# Supplementary material for: Key steps in unconventional secretion of fibroblast growth factor 2 reconstituted with purified components
Source: eLife. 2017 Jul 19;6:e28985. doi: 10.7554/eLife.28985 (PMC5601999; doi:10.7554/eLife.28985)
Supplement: Figure 1—source data 1. — This source file provides HSQC for all NMR titration experiments, of which examples are shown in Figure 1. DOI: http://dx.doi.org/10.7554/eLife.28985.003 [file elife-28985-fig1-data1.xlsx]

## Sheet: Fig.1-HSQC
Figure 1
I(1,4,5)P3 titration										heparin disaccharide titration										I(1,4,5)P3 titration with pre-bound heparin disaccharide										heparin disaccharide titration with pre-bound I(1,4,5)P3
	start point of titration [80 µM FGF2-C77/95S]				end point of titration [80 µM FGF2-C77/95S + 900 µM IP3]						start point of titration [80 µM FGF2-C77/95S]				end point of titration [80 µM FGF2-C77/95S + 900 µM heparin]						start point of titration [80 µM FGF2-C77/95S + 900 µM heparin]				end point of titration [80 µM FGF2-C77/95S + 900 µM heparin + 450 µM IP3*]						start point of titration [80 µM FGF2-C77/95S + 900 µM IP3]				end point of titration [80 µM FGF2-C77/95S + 900 µM IP3 + 900 µM heparin]							Overview
Residue	d 1H	d 15N	Line Width [ppm]		d 1H	d 15N	Line Width [ppm]	Dd [ppm]		Residue	d 1H	d 15N	Line Width [ppm]		d 1H	d 15N	Line Width [ppm]	Dd [ppm]		Residue	d 1H	d 15N	Line Width [ppm]		d 1H	d 15N	Line Width [ppm]	Dd [ppm]		Residue	d 1H	d 15N	Line Width [ppm]		d 1H	d 15N	Line Width [ppm]	Dd [ppm]
8LeuH	8.46258	129.072	0.036609		8.46079	129.079	0.03516	0.00206619		8LeuH	8.46258	129.072	0.036609		8.46971	129.086	0.03696	0.00742149		8LeuH	8.46971	129.086	0.03696		8.47363	129.1	0.0348802	0.00444848		8LeuH	8.46079	129.079	0.03516		8.4635	129.12	0.0345119	0.00671512
10AlaH	8.47167	126.861	0.0483538		8.46997	126.874	0.0491758	0.00255212		10AlaH	8.47167	126.861	0.0483538		8.47529	126.839	0.0503118	0.00487423		10AlaH	8.47529	126.839	0.0503118		8.48058	126.872	0.0341266	0.00721919		10AlaH	8.46997	126.874	0.0491758		8.4742	126.951	0.0462844	0.0123495
14AspH	8.49901	123.648	0.0358028		8.4959	123.642	0.0377222	0.0032615		14AspH	8.49901	123.648	0.0358028		8.50233	123.673	0.0351491	0.00500399		14AspH	8.50233	123.673	0.0351491		8.51099	123.706	0.0351579	0.0099445		14AspH	8.4959	123.642	0.0377222		8.49854	123.664	0.0441021	0.00429198
15GlyH	8.57145	112.189	0.0542219		n.d.	n.d.	n.d.	n.d		15GlyH	8.57145	112.189	0.0542219		8.57896	112.055	0.0655809	0.0214586		15GlyH	8.57896	112.055	0.0655809		n.d.	n.d.	n.d	n.d		15GlyH	n.d.	n.d.	n.d.		n.d.	n.d.	n.d.	n.d
17SerH	8.53749	116.167	0.0702554		n.d.	n.d.	n.d.	n.d		17SerH	8.53749	116.167	0.0702554		n.d.	n.d.	n.d.	n.d		17SerH	n.d.	n.d.	n.d.		n.d.	n.d.	n.d	n.d		17SerH	n.d.	n.d.	n.d.		n.d.	n.d.	n.d.	n.d
18GlyH	8.67106	113.558	0.0553862		n.d.	n.d.	n.d.	n.d		18GlyH	8.67106	113.558	0.0553862		n.d.	n.d.	n.d.	n.d		18GlyH	n.d.	n.d.	n.d.		n.d.	n.d.	n.d	n.d		18GlyH	n.d.	n.d.	n.d.		n.d.	n.d.	n.d.	n.d
19AlaH	8.13365	125.847	0.0410623		8.13587	125.84	0.0394168	0.00243689		19AlaH	8.13365	125.847	0.0410623		8.14522	125.869	0.0423259	0.0120306		19AlaH	8.14522	125.869	0.0423259		8.15086	125.931	0.0355684	0.010833		19AlaH	8.13587	125.84	0.0394168		8.13639	125.891	0.0405201	0.00760181
26LysH	8.21893	123.47	0.0509342		n.d.	n.d.	n.d.	n.d		26LysH	8.21893	123.47	0.0509342		n.d.	n.d.	n.d.	n.d		26LysH	n.d.	n.d.	n.d.		n.d.	n.d.	n.d	n.d		26LysH	n.d.	n.d.	n.d.		n.d.	n.d.	n.d.	n.d
29LysH	9.60397	122.378	0.0418425		9.58814	122.327	0.0455131	0.0175562		29LysH	9.60397	122.378	0.0418425		9.6039	122.414	0.0490426	0.00539295		29LysH	9.6039	122.414	0.0490426		9.61068	122.516	0.0379062	0.0168131		29LysH	9.58814	122.327	0.0455131		9.57741	122.425	0.0397994	0.0181753
30ArgH	9.06977	120.005	0.0433485		9.06439	119.945	0.0433307	0.0104983		30ArgH	9.06977	120.005	0.0433485		9.07805	120.055	0.0436062	0.0111336		30ArgH	9.07805	120.055	0.0436062		9.08372	119.968	0.042922	0.0142107		30ArgH	9.06439	119.945	0.0433307		9.06355	120.06	0.0386558	0.017245
31LeuH	10.56	127.774	0.0403748		10.5812	127.817	0.0387306	0.0222078		31LeuH	10.56	127.774	0.0403748		10.5767	127.887	0.0384999	0.0238167		31LeuH	10.5767	127.887	0.0384999		10.5963	127.917	0.0459644	0.0200784		31LeuH	10.5812	127.817	0.0387306		10.5997	127.922	0.0826686	0.0242635
32TyrH	8.88479	129.576	0.0405394		n.d.	n.d.	n.d.	n.d		32TyrH	8.88479	129.576	0.0405394		8.88015	129.616	0.0402807	0.00760739		32TyrH	8.88015	129.616	0.0402807		n.d.	n.d.	n.d	n.d		32TyrH	n.d.	n.d.	n.d.		n.d.	n.d.	n.d.	n.d
33CysH	9.58493	132.966	0.0396798		9.63048	133.174	0.039887	0.0552457		33CysH	9.58493	132.966	0.0396798		9.59036	133.057	0.0384883	0.0147685		33CysH	9.59036	133.057	0.0384883		9.63234	133.259	0.0401622	0.0517236		33CysH	9.63048	133.174	0.039887		9.62758	133.143	0.0425128	0.00550057
34LysH	8.61917	131.515	0.0387569		8.61867	131.51	0.0390295	0.000819665		34LysH	8.61917	131.515	0.0387569		8.62973	131.554	0.03809	0.0121116		34LysH	8.62973	131.554	0.03809		8.63692	131.564	0.0371556	0.00733753		34LysH	8.61867	131.51	0.0390295		8.60745	131.509	0.0438072	0.0112227
35AsnH	7.93622	120.705	0.0428704		7.94875	121.821	0.0404852	0.167952		35AsnH	7.93622	120.705	0.0428704		7.93415	120.586	0.0463309	0.0179741		35AsnH	7.93415	120.586	0.0463309		7.95737	121.495	0.0391711	0.138391		35AsnH	7.94875	121.821	0.0404852		7.94984	121.846	0.0395199	0.00390088
36GlyH	7.91915	111.266	0.0399889		7.87118	110.57	0.0372785	0.11484		36GlyH	7.91915	111.266	0.0399889		7.94426	111.461	0.0358948	0.0385348		36GlyH	7.94426	111.461	0.0358948		7.89573	110.79	0.0342198	0.111788		36GlyH	7.87118	110.57	0.0372785		7.88466	110.723	0.0400497	0.0265527
37GlyH	7.2953	111.067	0.0378219		7.30539	111.298	0.0389326	0.036059		37GlyH	7.2953	111.067	0.0378219		7.29227	111.006	0.041391	0.00966		37GlyH	7.29227	111.006	0.041391		7.31235	111.132	0.0399485	0.027512		37GlyH	7.30539	111.298	0.0389326		7.30131	111.287	0.0387844	0.0043816
38PheH	6.09931	115.888	0.037684		6.07108	115.847	0.0364464	0.0289008		38PheH	6.09931	115.888	0.037684		6.1007	115.877	0.037574	0.0021701		38PheH	6.1007	115.877	0.037574		6.08904	115.845	0.035558	0.0126139		38PheH	6.07108	115.847	0.0364464		6.07908	115.864	0.03855	0.00838977
39PheH	9.5982	123.509	0.0417753		9.594	123.516	0.0542872	0.00433109		39PheH	9.5982	123.509	0.0417753		9.59058	123.37	0.0403894	0.0221509		39PheH	9.59058	123.37	0.0403894		9.60312	123.426	0.0359009	0.0150485		39PheH	9.594	123.516	0.0542872		9.59867	123.474	0.0659396	0.00780361
40LeuH	8.47947	125.847	0.0420348		8.47866	125.828	0.0370544	0.00297009		40LeuH	8.47947	125.847	0.0420348		8.48528	125.846	0.0371477	0.0058126		40LeuH	8.48528	125.846	0.0371477		8.49254	125.875	0.034669	0.00845499		40LeuH	8.47866	125.828	0.0370544		8.48238	125.865	0.0380899	0.00674882
41ArgH	9.8561	131.66	0.0391454		9.89108	131.589	0.0361211	0.0365449		41ArgH	9.8561	131.66	0.0391454		9.86543	131.631	0.0386932	0.0102961		41ArgH	9.86543	131.631	0.0386932		9.90038	131.686	0.0438284	0.0359009		41ArgH	9.89108	131.589	0.0361211		9.89111	131.668	0.0381526	0.0117075
46GlyH	8.25569	110.329	0.0406413		8.25482	110.366	0.0384266	0.00551407		46GlyH	8.25569	110.329	0.0406413		8.25303	110.338	0.0396007	0.00293758		46GlyH	8.25303	110.338	0.0396007		8.26595	110.288	0.040486	0.014877		46GlyH	8.25482	110.366	0.0384266		8.24799	110.371	0.0361967	0.00687057
49AspH	9.31533	131.84	0.0357107		9.30052	131.654	0.0362126	0.0316123		49AspH	9.31533	131.84	0.0357107		9.32457	131.786	0.0339985	0.0123631		49AspH	9.32457	131.786	0.0339985		9.32346	131.78	0.0391128	0.00141496		49AspH	9.30052	131.654	0.0362126		9.30427	131.625	0.0448957	0.00577057
50GlyH	8.37772	106.394	0.0398676		8.27397	106.653	0.039658	0.11078		50GlyH	8.37772	106.394	0.0398676		8.3839	106.402	0.0404442	0.00629715		50GlyH	8.3839	106.402	0.0404442		8.31446	106.536	0.0426632	0.072281		50GlyH	8.27397	106.653	0.039658		8.28754	106.756	0.0360165	0.0205881
51ValH	9.10137	118.199	0.0386408		9.10359	118.275	0.0393156	0.0116951		51ValH	9.10137	118.199	0.0386408		9.11017	118.208	0.0387528	0.00891391		51ValH	9.11017	118.208	0.0387528		9.11112	118.221	0.0412788	0.00215428		51ValH	9.10359	118.275	0.0393156		9.1067	118.318	0.0383156	0.00710393
52ArgH	9.49336	127.45	0.0483653		9.52873	127.599	0.0388767	0.0417893		52ArgH	9.49336	127.45	0.0483653		9.50701	127.558	0.0474323	0.0211279		52ArgH	9.50701	127.558	0.0474323		n.d.	n.d.	n.d	n.d		52ArgH	9.52873	127.599	0.0388767		9.53439	127.738	0.0493271	0.0217045
53GluH	7.32549	122.14	0.0376895		7.31222	122.083	0.0353316	0.0157656		53GluH	7.32549	122.14	0.0376895		7.31215	122.206	0.0373591	0.0166176		53GluH	7.31215	122.206	0.0373591		7.31884	122.157	0.0383178	0.00996206		53GluH	7.31222	122.083	0.0353316		7.32481	122.099	0.0358062	0.0128139
54LysH	8.64593	127.519	0.0421295		8.65801	127.604	0.0396987	0.0175127		54LysH	8.64593	127.519	0.0421295		8.65596	127.606	0.0380341	0.0164484		54LysH	8.65596	127.606	0.0380341		8.67095	127.687	0.0359636	0.0192429		54LysH	8.65801	127.604	0.0396987		8.66933	127.588	0.0516235	0.0115664
55SerH	8.35385	114.923	0.0367408		8.36563	114.876	0.0406376	0.0137146		55SerH	8.35385	114.923	0.0367408		8.37378	114.899	0.0436713	0.0202318		55SerH	8.37378	114.899	0.0436713		8.38231	114.856	0.0407498	0.0107059		55SerH	8.36563	114.876	0.0406376		8.34294	114.792	0.0468151	0.0259523
56AspH	7.25928	128.64	0.0369084		7.2666	128.671	0.0359908	0.00865683		56AspH	7.25928	128.64	0.0369084		7.27215	128.672	0.0373048	0.013746		56AspH	7.27215	128.672	0.0373048		7.27792	128.668	0.0377342	0.00579356		56AspH	7.2666	128.671	0.0359908		7.26842	128.753	0.0373112	0.0124799
58HisH	9.6467	121.601	0.0586952		9.66036	121.739	0.0472654	0.0248736		58HisH	9.6467	121.601	0.0586952		9.67263	121.694	0.0546629	0.0294728		58HisH	9.67263	121.694	0.0546629		9.66932	121.635	0.0474303	0.0094656		58HisH	9.66036	121.739	0.0472654		9.65747	121.653	0.0390711	0.0132681
59IleH	6.98667	110.285	0.0482814		6.98167	110.325	0.0435002	0.00779413		59IleH	6.98667	110.285	0.0482814		6.99682	110.302	0.0413757	0.010451		59IleH	6.99682	110.302	0.0413757		7.00267	110.196	0.0427147	0.0169505		59IleH	6.98167	110.325	0.0435002		6.99849	110.326	0.0494621	0.0168206
60LysH	6.80757	122.839	0.0390186		6.81043	122.837	0.0413644	0.00287461		60LysH	6.80757	122.839	0.0390186		6.81455	122.838	0.0399763	0.00698277		60LysH	6.81455	122.838	0.0399763		6.8192	122.862	0.042917	0.00590649		60LysH	6.81043	122.837	0.0413644		6.81898	122.911	0.0381209	0.0139993
61LeuH	9.94438	132.32	0.0402134		9.94313	132.257	0.0372611	0.00960965		61LeuH	9.94438	132.32	0.0402134		9.95613	132.302	0.0445619	0.0120522		61LeuH	9.95613	132.302	0.0445619		9.96251	132.406	0.0471566	0.0168653		61LeuH	9.94313	132.257	0.0372611		9.9473	132.26	0.039322	0.00419155
62GlnH	9.64686	123.019	0.0411158		9.64022	122.887	0.030378	0.0208297		62GlnH	9.64686	123.019	0.0411158		9.65403	123.014	0.0365109	0.00721214		62GlnH	9.65403	123.014	0.0365109		9.65805	122.991	0.0413827	0.0052547		62GlnH	9.64022	122.887	0.030378		9.63683	122.997	0.0377393	0.0167506
63LeuH	9.32512	134.972	0.0403683		9.33077	134.868	0.0416695	0.016634		63LeuH	9.32512	134.972	0.0403683		9.33315	134.932	0.0417744	0.0100294		63LeuH	9.33315	134.932	0.0417744		9.34171	134.991	0.0440738	0.0122705		63LeuH	9.33077	134.868	0.0416695		9.33607	134.959	0.0399383	0.0146163
65AlaH	8.70638	131.393	0.0384106		n.d.	n.d.	n.d.	n.d		65AlaH	8.70638	131.393	0.0384106		8.71999	131.351	0.0394167	0.0149936		65AlaH	8.71999	131.351	0.0394167		n.d.	n.d.	n.d	n.d		65AlaH	n.d.	n.d.	n.d.		n.d.	n.d.	n.d.	n.d
66GluH	8.68567	129.677	0.0418176		8.69152	129.69	0.0420441	0.00612955		66GluH	8.68567	129.677	0.0418176		8.69326	129.808	0.0482465	0.0209488		66GluH	8.69326	129.808	0.0482465		8.70343	129.851	0.0393526	0.0120333		66GluH	8.69152	129.69	0.0420441		8.68642	129.8	0.0442631	0.0173648
67GluH	8.76746	122.183	0.0366755		8.77671	122.227	0.0354824	0.0114052		67GluH	8.76746	122.183	0.0366755		8.77624	122.161	0.035636	0.0093361		67GluH	8.77624	122.161	0.035636		8.78756	122.235	0.0384591	0.0157797		67GluH	8.77671	122.227	0.0354824		8.79991	122.395	0.0334545	0.0342642
70ValH	8.5503	124.636	0.0439136		8.56024	124.692	0.0370238	0.0129975		70ValH	8.5503	124.636	0.0439136		8.56126	124.658	0.0412508	0.0114327		70ValH	8.56126	124.658	0.0412508		8.57347	124.721	0.0398295	0.0154609		70ValH	8.56024	124.692	0.0370238		8.56153	124.818	0.0379718	0.0188512
71ValH	9.9468	122.411	0.0412229		9.93726	122.333	0.0571264	0.0151861		71ValH	9.9468	122.411	0.0412229		9.94993	122.519	0.0361148	0.0165084		71ValH	9.94993	122.519	0.0361148		9.95057	122.482	0.0400031	0.00559274		71ValH	9.93726	122.333	0.0571264		9.9374	122.45	0.0462572	0.0175416
73IleH	10.7043	125.457	0.0401061		10.6976	125.436	0.0401163	0.00740814		73IleH	10.7043	125.457	0.0401061		10.7167	125.482	0.0385759	0.0128855		73IleH	10.7167	125.482	0.0385759		10.7191	125.508	0.0457494	0.00460908		73IleH	10.6976	125.436	0.0401163		10.7058	125.68	0.0356286	0.0374671
74LysH	8.99956	130.348	0.0431568		9.01101	130.226	0.0393622	0.0216683		74LysH	8.99956	130.348	0.0431568		9.00709	130.328	0.0496964	0.0081314		74LysH	9.00709	130.328	0.0496964		9.02441	130.325	0.0473725	0.0173262		74LysH	9.01101	130.226	0.0393622		9.01234	130.329	0.0453266	0.0155206
75GlyH	9.41626	116.885	0.0394011		9.41374	116.866	0.0380005	0.00381445		75GlyH	9.41626	116.885	0.0394011		9.42315	116.895	0.0379044	0.00707447		75GlyH	9.42315	116.895	0.0379044		9.42985	116.83	0.0454014	0.0119144		75GlyH	9.41374	116.866	0.0380005		9.41418	116.929	0.0370322	0.00946024
76ValH	8.13658	130.928	0.0386819		8.12991	130.901	0.0375305	0.00781969		76ValH	8.13658	130.928	0.0386819		8.14733	130.926	0.0416618	0.0107573		76ValH	8.14733	130.926	0.0416618		8.14814	130.968	0.0433653	0.00636525		76ValH	8.12991	130.901	0.0375305		8.13267	130.992	0.0416688	0.0139748
77SerH	9.6539	118.933	0.0389153		9.65212	118.947	0.0368554	0.00284432		77SerH	9.6539	118.933	0.0389153		9.65962	118.962	0.0415729	0.00726497		77SerH	9.65962	118.962	0.0415729		9.67226	118.952	0.042205	0.012744		77SerH	9.65212	118.947	0.0368554		9.65307	118.899	0.0472487	0.00733082
80ArgH	6.90146	115.052	0.0582039		6.89937	115.07	0.0408749	0.00345009		80ArgH	6.90146	115.052	0.0582039		6.90496	115.07	0.0380119	0.00443695		80ArgH	6.90496	115.07	0.0380119		6.91081	115.063	0.0525246	0.0059609		80ArgH	6.89937	115.07	0.0408749		6.89972	115.155	0.0381635	0.0126333
81TyrH	9.71992	123.203	0.0386745		9.73075	123.211	0.0387226	0.0108837		81TyrH	9.71992	123.203	0.0386745		9.73282	123.232	0.0370301	0.0135744		81TyrH	9.73282	123.232	0.0370301		9.74295	123.246	0.0430435	0.0103675		81TyrH	9.73075	123.211	0.0387226		9.74518	123.259	0.0368771	0.0161805
82LeuH	9.32579	126.963	0.0390995		9.32852	127.152	0.0380102	0.0284573		82LeuH	9.32579	126.963	0.0390995		9.33315	127.018	0.0363437	0.0109677		82LeuH	9.33315	127.018	0.0363437		9.34297	127.081	0.0379571	0.0136733		82LeuH	9.32852	127.152	0.0380102		9.33231	127.113	0.0359226	0.00701074
83AlaH	9.27382	130.257	0.0363701		9.26523	130.231	0.034585	0.00946576		83AlaH	9.27382	130.257	0.0363701		9.28758	130.313	0.0360111	0.0160777		83AlaH	9.28758	130.313	0.0360111		9.2878	130.218	0.0337294	0.0142712		83AlaH	9.26523	130.231	0.034585		9.2951	130.283	0.0558233	0.0308671
84MetH	7.89171	122.021	0.0370556		7.89005	122.011	0.0363665	0.00224135		84MetH	7.89171	122.021	0.0370556		7.8865	121.98	0.0406438	0.00798149		84MetH	7.8865	121.98	0.0406438		7.89855	122.017	0.0385493	0.0132554		84MetH	7.89005	122.011	0.0363665		7.88622	122.04	0.0358577	0.00588071
85LysH	8.67219	124.646	0.0419582		8.65403	124.775	0.0432167	0.0266202		85LysH	8.67219	124.646	0.0419582		8.68545	124.795	0.0382437	0.026105		85LysH	8.68545	124.795	0.0382437		8.67428	124.785	0.0377124	0.0112834		85LysH	8.65403	124.775	0.0432167		8.65812	124.85	0.0507353	0.0119042
86GluH	8.08141	119.267	0.0400279		8.06915	119.184	0.0787419	0.0175513		86GluH	8.08141	119.267	0.0400279		8.08793	119.182	0.0372952	0.0143564		86GluH	8.08793	119.182	0.0372952		8.08441	119.235	0.040958	0.00862589		86GluH	8.06915	119.184	0.0787419		8.07051	119.246	0.0529001	0.00944493
88GlyH	8.78839	111.753	0.042212		8.77519	111.905	0.0382973	0.0263506		88GlyH	8.78839	111.753	0.042212		8.79638	111.779	0.0396583	0.00885902		88GlyH	8.79638	111.779	0.0396583		8.79286	111.815	0.0440222	0.00650387		88GlyH	8.77519	111.905	0.0382973		8.78035	111.909	0.0363108	0.00519322
89ArgH	7.68782	121.563	0.0390156		7.65737	121.358	0.036921	0.0432563		89ArgH	7.68782	121.563	0.0390156		7.68644	121.467	0.0372752	0.0144719		89ArgH	7.68644	121.467	0.0372752		7.67529	121.397	0.0380986	0.0152583		89ArgH	7.65737	121.358	0.036921		7.66272	121.454	0.0374167	0.0153617
92AlaH	8.98458	125.702	0.0446205		8.9795	125.679	0.0373607	0.0061492		92AlaH	8.98458	125.702	0.0446205		8.99925	125.743	0.044381	0.015918		92AlaH	8.99925	125.743	0.044381		8.99941	125.742	0.0390441	0.000278539		92AlaH	8.9795	125.679	0.0373607		8.98121	125.694	0.0411664	0.00282248
93SerH	10.0079	124.35	0.035788		9.99642	124.261	0.0615069	0.0175694		93SerH	10.0079	124.35	0.035788		10.0082	124.404	0.0374554	0.00809001		93SerH	10.0082	124.404	0.0374554		10.0172	124.365	0.0382213	0.0106694		93SerH	9.99642	124.261	0.0615069		9.9962	124.408	0.0669095	0.0220001
95SerH	7.89352	113.397	0.0419387		7.92806	113.504	0.0356818	0.0380397		95SerH	7.89352	113.397	0.0419387		7.91303	113.461	0.0440348	0.0216952		95SerH	7.91303	113.461	0.0440348		7.92838	113.428	0.0379008	0.016116		95SerH	7.92806	113.504	0.0356818		7.95446	113.821	0.0532508	0.0543793
96ValH	8.5985	126.17	0.0380736		8.5882	125.893	0.0310496	0.0428324		96ValH	8.5985	126.17	0.0380736		8.59708	126.131	0.036489	0.00605049		96ValH	8.59708	126.131	0.036489		8.5985	125.898	0.0340006	0.0349983		96ValH	8.5882	125.893	0.0310496		8.582	125.806	0.0396847	0.0144479
97ThrH	7.50638	122.476	0.038613		7.50958	122.491	0.0377777	0.00390925		97ThrH	7.50638	122.476	0.038613		7.51822	122.523	0.0390631	0.0137754		97ThrH	7.51822	122.523	0.0390631		7.5227	122.502	0.042329	0.00543888		97ThrH	7.50958	122.491	0.0377777		7.51504	122.527	0.0354131	0.0076656
98AspH	9.01254	120.407	0.0419918		9.0025	120.399	0.0461482	0.0101088		98AspH	9.01254	120.407	0.0419918		9.01563	120.377	0.0502221	0.00543159		98AspH	9.01563	120.377	0.0502221		9.01595	120.422	0.0440698	0.00664821		98AspH	9.0025	120.399	0.0461482		9.00466	120.376	0.056129	0.00412648
99GluH	7.97257	122.132	0.0416838		7.97829	122.211	0.0321853	0.0131164		99GluH	7.97257	122.132	0.0416838		7.98047	122.142	0.0350664	0.00804339		99GluH	7.98047	122.142	0.0350664		7.99146	122.168	0.03271	0.011661		99GluH	7.97829	122.211	0.0321853		7.97989	122.259	0.0330334	0.00743715
100CysH	7.93483	118.529	0.0385701		7.91338	118.533	0.0374187	0.0214575		100CysH	7.93483	118.529	0.0385701		7.92846	118.619	0.0498933	0.0149084		100CysH	7.92846	118.619	0.0498933		7.92567	118.521	0.0353284	0.0149388		100CysH	7.91338	118.533	0.0374187		7.91617	118.567	0.0359394	0.00582248
101PheH	6.66796	118.14	0.0380833		6.64795	118.092	0.0565935	0.0212573		101PheH	6.66796	118.14	0.0380833		6.67248	118.136	0.0375923	0.00454654		101PheH	6.67248	118.136	0.0375923		6.66218	118.113	0.0870434	0.0108754		101PheH	6.64795	118.092	0.0565935		6.65006	118.144	0.0583645	0.00807311
102PheH	9.63263	124.016	0.0537554		9.61901	123.981	0.0384468	0.014593		102PheH	9.63263	124.016	0.0537554		9.63546	124.047	0.0415036	0.0054961		102PheH	9.63546	124.047	0.0415036		9.6409	124.061	0.0449945	0.0058115		102PheH	9.61901	123.981	0.0384468		9.62065	124.023	0.0412119	0.0064969
103PheH	10.4806	125.053	0.039885		10.4509	125.055	0.0384898	0.0296516		103PheH	10.4806	125.053	0.039885		10.4856	125.023	0.0403974	0.00681196		103PheH	10.4856	125.023	0.0403974		10.4763	125.03	0.0430561	0.00943892		103PheH	10.4509	125.055	0.0384898		10.4618	125.058	0.0401229	0.0108499
104GluH	8.89796	132.008	0.040185		8.89436	131.996	0.0391936	0.0039913		104GluH	8.89796	132.008	0.040185		8.91204	131.995	0.0377106	0.0142125		104GluH	8.91204	131.995	0.0377106		8.91613	132.087	0.0437768	0.0144537		104GluH	8.89436	131.996	0.0391936		8.90096	132.012	0.0512333	0.00700656
105ArgH	8.74208	132.633	0.0388709		8.76877	132.718	0.038525	0.0295972		105ArgH	8.74208	132.633	0.0388709		8.76211	132.674	0.0371234	0.0209907		105ArgH	8.76211	132.674	0.0371234		8.78003	132.772	0.0395786	0.0230925		105ArgH	8.76877	132.718	0.038525		8.76863	132.773	0.0381386	0.00831868
106LeuH	8.54734	130.114	0.0380329		8.53634	130.094	0.0371158	0.0113884		106LeuH	8.54734	130.114	0.0380329		8.54884	130.102	0.0379893	0.00230071		106LeuH	8.54884	130.102	0.0379893		8.55092	130.182	0.0404677	0.0121257		106LeuH	8.53634	130.094	0.0371158		8.53542	130.133	0.0380836	0.00583153
107GluH	9.62301	131.313	0.0422162		9.60625	131.221	0.045283	0.0216675		107GluH	9.62301	131.313	0.0422162		9.61974	131.212	0.0416009	0.0155209		107GluH	9.61974	131.212	0.0416009		9.62822	131.307	0.0467255	0.016621		107GluH	9.60625	131.221	0.045283		9.61222	131.247	0.0441691	0.00714578
108SerH	8.57652	115.998	0.0556947		n.d.	n.d.	n.d.	n.d		108SerH	8.57652	115.998	0.0556947		8.50582	115.047	0.0398432	0.159174		108SerH	8.50582	115.047	0.0398432		n.d.	n.d.	n.d	n.d		108SerH	n.d.	n.d.	n.d.		n.d.	n.d.	n.d.	n.d
110AsnH	8.62889	111.369	0.0469283		8.61151	111.431	0.0447257	0.0197608		110AsnH	8.62889	111.369	0.0469283		8.6245	111.471	0.0432119	0.0159246		110AsnH	8.6245	111.471	0.0432119		8.62761	111.384	0.0486602	0.0133265		110AsnH	8.61151	111.431	0.0447257		8.60513	111.581	0.0408912	0.023325
111TyrH	8.0127	120.871	0.0490703		8.02197	120.984	0.0379174	0.0192851		111TyrH	8.0127	120.871	0.0490703		8.01167	120.864	0.0546334	0.00151097		111TyrH	8.01167	120.864	0.0546334		8.04072	121.012	0.0427306	0.0365278		111TyrH	8.02197	120.984	0.0379174		8.02856	120.996	0.0484852	0.00684219
113ThrH	8.94978	109.965	0.0406153		8.9432	109.825	0.0388658	0.0219838		113ThrH	8.94978	109.965	0.0406153		8.95511	109.987	0.0380125	0.00623439		113ThrH	8.95511	109.987	0.0380125		8.9572	109.833	0.0435294	0.0231944		113ThrH	8.9432	109.825	0.0388658		8.94319	109.86	0.0375186	0.00523651
114TyrH	10.8477	122.808	0.0416426		10.898	122.895	0.0379941	0.0519601		114TyrH	10.8477	122.808	0.0416426		10.8712	122.88	0.0383311	0.0257912		114TyrH	10.8712	122.88	0.0383311		10.9054	122.857	0.049356	0.0344583		114TyrH	10.898	122.895	0.0379941		10.8972	122.858	0.0389238	0.00568012
115ArgH	8.96745	129.584	0.0425632		8.9766	129.218	0.0382086	0.055644		115ArgH	8.96745	129.584	0.0425632		8.98488	129.546	0.0387526	0.0183397		115ArgH	8.98488	129.546	0.0387526		8.99212	129.474	0.0372275	0.0130471		115ArgH	8.9766	129.218	0.0382086		8.98408	129.277	0.0717387	0.0115259
116SerH	9.04956	123.712	0.0364777		9.01349	123.484	0.0383622	0.0496348		116SerH	9.04956	123.712	0.0364777		9.04973	123.695	0.0363574	0.00254518		116SerH	9.04973	123.695	0.0363574		9.0401	123.581	0.0399887	0.0196199		116SerH	9.01349	123.484	0.0383622		9.01539	123.497	0.0439315	0.00272904
118LysH	7.77035	121.624	0.0393995		7.76757	121.627	0.0382447	0.00281912		118LysH	7.77035	121.624	0.0393995		7.77966	121.628	0.0375964	0.00933336		118LysH	7.77966	121.628	0.0375964		7.78248	121.643	0.0391557	0.00357695		118LysH	7.76757	121.627	0.0382447		7.77494	121.696	0.0381072	0.0127279
119TyrH	8.21832	126.026	0.0426		8.22258	125.971	0.0418722	0.0093463		119TyrH	8.21832	126.026	0.0426		8.23299	126.045	0.0457808	0.0149526		119TyrH	8.23299	126.045	0.0457808		8.23679	126.017	0.0409441	0.00570296		119TyrH	8.22258	125.971	0.0418722		8.22479	126.007	0.0399903	0.00584445
120ThrH	6.84529	106.817	0.0396513		6.87795	106.937	0.0385596	0.0372997		120ThrH	6.84529	106.817	0.0396513		6.8318	106.678	0.0356692	0.024797		120ThrH	6.8318	106.678	0.0356692		6.88163	106.838	0.0392821	0.0552864		120ThrH	6.87795	106.937	0.0385596		6.88509	107.019	0.0401642	0.0142585
124ValH	8.90057	125.031	0.0464752		8.9319	125.149	0.044978	0.0360004		124ValH	8.90057	125.031	0.0464752		8.91025	125.03	0.0487778	0.00968003		124ValH	8.91025	125.03	0.0487778		8.94183	125.118	0.0373911	0.0341885		124ValH	8.9319	125.149	0.044978		8.93181	125.201	0.0442522	0.00780502
125AlaH	9.01717	131.924	0.0519146		9.02215	132.266	0.0402679	0.0514844		125AlaH	9.01717	131.924	0.0519146		9.03594	132.018	0.0388402	0.0234472		125AlaH	9.03594	132.018	0.0388402		9.03749	132.296	0.042622	0.0416973		125AlaH	9.02215	132.266	0.0402679		9.02063	132.263	0.045866	0.00158779
126LeuH	8.03336	119.465	0.0712393		8.07227	119.826	0.082286	0.0666945		126LeuH	8.03336	119.465	0.0712393		8.02503	119.636	0.0463762	0.0270957		126LeuH	8.02503	119.636	0.0463762		8.06812	119.786	0.0402153	0.0486079		126LeuH	8.07227	119.826	0.082286		8.07037	120.013	0.0935036	0.0281008
127LysH	8.83451	119.624	0.0402379		8.84078	120.486	0.03914	0.129461		127LysH	8.83451	119.624	0.0402379		8.82322	119.618	0.0367791	0.011322		127LysH	8.82322	119.618	0.0367791		8.85051	120.26	0.0368566	0.100125		127LysH	8.84078	120.486	0.03914		8.84588	120.451	0.041204	0.00724758
129ThrH	6.9382	107.217	0.0475312		6.94908	107.357	0.0329577	0.0236005		129ThrH	6.9382	107.217	0.0475312		6.95752	107.207	0.0550711	0.0193753		129ThrH	6.95752	107.207	0.0550711		6.95564	107.254	0.0392117	0.00722682		129ThrH	6.94908	107.357	0.0329577		6.95041	107.39	0.0412907	0.00518208
130Gly	7.771	115.284	26.1195		8.087	116.266	27.306	0.359991		130Gly	7.771	115.284	26.1195		7.81	115.363	0.0379571	0.0407606		130Gly	7.81	115.363	0.0379571		8.024	116.013	0.0378771	0.235164		130Gly	8.087	116.266	27.306		8.096	116.313	0.0507229	0.0114325
131GlnH	6.74279	118.1	0.0397844		6.68744	117.969	0.0573905	0.058728		131GlnH	6.74279	118.1	0.0397844		6.74034	118.098	0.0374869	0.00248156		131GlnH	6.74034	118.098	0.0374869		6.711	117.992	0.0855876	0.033357		131GlnH	6.68744	117.969	0.0573905		6.69701	117.996	0.0591204	0.0103455
132TyrH	8.71379	120.698	0.0375671		8.95099	121.258	0.0458026	0.251636		132TyrH	8.71379	120.698	0.0375671		8.71624	120.715	0.0367918	0.0035384		132TyrH	8.71624	120.715	0.0367918		n.d.	n.d.	n.d	n.d		132TyrH	8.95099	121.258	0.0458026		8.95375	121.279	0.0580158	0.00417232
133LysH	8.34914	125.794	0.0365759		8.39206	126.829	0.0390353	0.161007		133LysH	8.34914	125.794	0.0365759		8.34157	125.813	0.0390029	0.00806208		133LysH	8.34157	125.813	0.0390029		8.39396	126.624	0.040431	0.132544		133LysH	8.39206	126.829	0.0390353		8.39599	126.816	0.0427073	0.00439052
134LeuH	8.81215	130.482	0.0392092		8.89968	129.806	0.0417679	0.133958		134LeuH	8.81215	130.482	0.0392092		8.79805	130.149	0.0376284	0.0518485		134LeuH	8.79805	130.149	0.0376284		8.88427	130.091	0.0362026	0.086653		134LeuH	8.89968	129.806	0.0417679		8.90167	129.88	0.0475773	0.0112888
135GlyH	9.97293	113.138	0.0413422		9.93442	112.773	0.0387649	0.0669163		135GlyH	9.97293	113.138	0.0413422		9.97571	113.011	0.0451913	0.0192844		135GlyH	9.97571	113.011	0.0451913		9.95818	112.801	0.041884	0.035951		135GlyH	9.93442	112.773	0.0387649		9.93806	112.889	0.0404768	0.017759
136SerH	6.55422	113.41	0.0396586		6.57442	113.138	0.037774	0.0454985		136SerH	6.55422	113.41	0.0396586		6.55457	113.246	0.0402746	0.0244855		136SerH	6.55457	113.246	0.0402746		6.5757	113.135	0.0389539	0.0269686		136SerH	6.57442	113.138	0.037774		6.56844	113.181	0.0371613	0.00885961
137LysH	7.94562	122.982	0.0436605		7.93351	122.766	0.0345676	0.0346468		137LysH	7.94562	122.982	0.0436605		7.94621	122.949	0.0686409	0.00504015		137LysH	7.94621	122.949	0.0686409		7.94737	122.774	0.0350602	0.0262696		137LysH	7.93351	122.766	0.0345676		7.92898	122.804	0.0342342	0.0073669
142GlnH	6.9392	120.415	0.0395436		6.97907	120.841	0.0387259	0.0752749		142GlnH	6.9392	120.415	0.0395436		6.94189	120.449	0.0377422	0.00576727		142GlnH	6.94189	120.449	0.0377422		6.97895	120.739	0.0406055	0.0571234		142GlnH	6.97907	120.841	0.0387259		6.98214	120.843	0.0385046	0.00309017
144AlaH	7.89418	117.21	0.0358		n.d.	n.d.	n.d.	n.d		144AlaH	7.89418	117.21	0.0358		7.86406	117.178	0.0362139	0.0305058		144AlaH	7.86406	117.178	0.0362139		n.d.	n.d.	n.d	n.d		144AlaH	n.d.	n.d.	n.d.		n.d.	n.d.	n.d.	n.d
145IleH	6.46457	104.409	0.0381028		6.36497	103.912	0.0396059	0.124472		145IleH	6.46457	104.409	0.0381028		6.42299	104.275	0.038319	0.0462089		145IleH	6.42299	104.275	0.038319		6.38884	103.91	0.0388979	0.0645401		145IleH	6.36497	103.912	0.0396059		6.36599	104.011	0.0403427	0.0149598
146LeuH	7.18117	124.763	0.0389001		7.27303	124.939	0.0351025	0.0955829		146LeuH	7.18117	124.763	0.0389001		7.19431	124.839	0.037321	0.0173989		146LeuH	7.19431	124.839	0.037321		7.26275	124.952	0.04007	0.0704908		146LeuH	7.27303	124.939	0.0351025		7.27569	124.962	0.0373013	0.00428782
147PheH	10.0401	123.962	0.0394873		10.0168	123.85	0.0448548	0.0287203		147PheH	10.0401	123.962	0.0394873		10.0403	123.871	0.0376267	0.0136965		147PheH	10.0403	123.871	0.0376267		10.0358	123.824	0.0400311	0.00823095		147PheH	10.0168	123.85	0.0448548		10.0152	123.851	0.0447496	0.00152373
148LeuH	10.4676	131.452	0.0389776		10.4986	131.568	0.0389214	0.0355224		148LeuH	10.4676	131.452	0.0389776		10.504	131.382	0.0389115	0.0378834		148LeuH	10.504	131.382	0.0389115		10.5137	131.623	0.0431099	0.0374001		148LeuH	10.4986	131.568	0.0389214		10.4949	131.558	0.0352478	0.00402693
150MetH	9.6398	127.532	0.0474765		9.6593	127.641	0.0380206	0.0254793		150MetH	9.6398	127.532	0.0474765		9.66173	127.626	0.0377326	0.0260855		150MetH	9.66173	127.626	0.0377326		9.67348	127.679	0.0426689	0.0142129		150MetH	9.6593	127.641	0.0380206		9.66162	127.747	0.0428192	0.0161099
152AlaH	8.7287	130.148	0.0406321		n.d.	n.d.	n.d.	n.d		152AlaH	8.7287	130.148	0.0406321		n.d.	n.d.	n.d.	n.d		152AlaH	n.d.	n.d.	n.d.		n.d.	n.d.	n.d	n.d		152AlaH	n.d.	n.d.	n.d.		n.d.	n.d.	n.d.	n.d
154SerH	8.01313	124.64	0.0364138		8.03496	124.698	0.0386534	0.0235159		154SerH	8.01313	124.64	0.0364138		8.03872	124.677	0.038291	0.0261805		154SerH	8.03872	124.677	0.038291		8.04402	124.698	0.0334651	0.00612971		154SerH	8.03496	124.698	0.0386534		8.06239	124.677	0.047022	0.0276256
																				* Since replacement of heparin by IP3 was completed at low IP3 concentration (no further change in signal chemical shifts with increasing concentration of the titrant), IP3 titration was stopped at 450 µM.
