# Supplementary material for: Key steps in unconventional secretion of fibroblast growth factor 2 reconstituted with purified components
Source: eLife. 2017 Jul 19;6:e28985. doi: 10.7554/eLife.28985 (PMC5601999; doi:10.7554/eLife.28985)
Supplement: Figure 2—source data 1. — This source file provides raw and normalized data, and calculations of mean values with standard deviations that are plotted in Figure 2, panels B and D. DOI: http://dx.doi.org/10.7554/eLife.28985.005 [file elife-28985-fig2-data1.xlsx]

## Sheet: Fig. 2
	Figure 2
	Long-chain Heparin			raw data						normalized to PIP2+0µM Heprin
	Pellet	Heparin conc. (µM)	Liposomes	Exp1	Exp2	Exp3	mean (n=3)	SD (n=3)		Exp1	Exp2	Exp3	mean (n=3)	SD (n=3)
	FGF2 signal	0	PM	76065	67625	37278	60322.7	20398.6		3.61731	2.8374	2.39114	2.94862	0.620608
		0	PIP2	2102804	2383347	1559007	2.01505e+06	419117		104.355	118.277	77.3681	100	20.7993
		2.5	PIP2	1785819	1974096	1581251	1.78039e+06	196479		84.9256	82.8287	101.427	89.727	10.1864
		5	PIP2	1340591	1060377	822455	1.07447e+06	259356		63.7525	44.4911	52.7551	53.6662	9.663
		12.5	PIP2	507437	331693	309170	382767	108553		24.1314	13.9171	19.8312	19.2933	5.12837
		25	PIP2	383285	222905	156546	254245	116573		18.2273	9.3526	10.0414	12.5404	4.93702
		50	PIP2	289372	140934	111950	180752	95177.4		13.7612	5.91328	7.18085	8.95179	4.21305
		100	PIP2	316056	101055	105151	174087	122966		15.0302	4.24005	6.74474	8.67167	5.64728
		175	PIP2	191845	114677	98236	134919	49979.7		9.12329	4.81159	6.30119	6.74536	2.1899
		250	PIP2	186746	117738	77080	127188	55440.4		8.88081	4.94003	4.94417	6.255	2.27402
	Long-chain Heparin			raw data						normalized to PM+0µM Heparin
	Supernatant	Heparin conc. (µM)	Liposomes	Exp1	Exp2	Exp3	mean (n=3)	SD (n=3)		Exp1	Exp2	Exp3	mean (n=3)	SD (n=3)
	FGF2 signal	0	PM	2145963	2040640	1459384	1.882e+06	369762		114.026	108.43	77.5445	100	19.6473
		0	PIP2	840058	920477	840114	866883	46413.8		39.146	45.1073	57.5663	47.2732	9.39925
		2.5	PIP2	1106715	1199323	1065712	1.12392e+06	68446.3		51.572	58.7719	73.0248	61.1229	10.9179
		5	PIP2	1490178	1596095	1216378	1434217	195946		69.441	78.2154	83.3487	77.0017	7.03286
		12.5	PIP2	1697679	1772528	1599816	1.69001e+06	86611.2		79.1104	86.8614	109.623	91.8648	15.8596
		25	PIP2	1749369	1795269	1645037	1.72989e+06	76986.6		81.5191	87.9758	112.721	94.0721	16.4702
		50	PIP2	1792917	1890092	1622327	1.76845e+06	135550		83.5484	92.6225	111.165	95.7787	14.0763
		100	PIP2	1698904	1728476	1605119	1.6775e+06	64403.8		79.1674	84.7026	109.986	91.2854	16.43
		175	PIP2	1699333	1674840	1508715	1.62763e+06	103708		79.1874	82.0743	103.38	88.214	13.2135
		250	PIP2	1673389	1598035	1383709	1551711	150293		77.9785	78.3105	94.8146	83.7012	9.62593
	Disacharide Heparin			raw data						normalized to PIP2+0µM Heprin
	Pellet	Heparin conc. (µM)	Liposomes	Exp1	Exp2	Exp3	mean (n=3)	SD (n=3)		Exp1	Exp2	Exp3	mean (n=3)	SD (n=3)
	FGF2 signal	0	PM	53683	43649	39497	45609.7	7293.41		2.05964	2.23332	2.51476	2.26924	0.229677
		0	PIP2	2606425	1954441	1570605	2.04382e+06	523663		127.527	95.6267	76.8464	100	25.6217
		2.5	PIP2	2768408	1859467	1637692	2.08852e+06	599149		106.215	95.1406	104.271	101.876	5.91305
		5	PIP2	2758220	1654291	1751462	2.05466e+06	611237		105.824	84.6427	111.515	100.661	14.1608
		12.5	PIP2	2684203	1555814	1659453	1966490	623714		102.984	79.604	105.657	96.0817	14.3325
		25	PIP2	2520255	1685100	1646879	1.95074e+06	493581		96.6939	86.219	104.856	95.9231	9.34254
		50	PIP2	2778887	1613968	1647413	2.01342e+06	663122		106.617	82.5795	104.89	98.0289	13.4074
		100	PIP2	2582508	1601355	1586064	1923309	570934		99.0824	81.9342	100.984	94.0003	10.4927
		175	PIP2	2311306	1474786	1574026	1786706	457019		88.6772	75.4582	100.218	88.1178	12.3893
		250	PIP2	2340422	1482364	1606627	1.8098e+06	463710		89.7943	75.8459	102.294	89.3113	13.2304
	Disacharide Heparin			raw data						normalized to PM+0µM Heparin
	Supernatant	Heparin conc. (µM)	Liposomes	Exp1	Exp2	Exp3	mean (n=3)	SD (n=3)		Exp1	Exp2	Exp3	mean (n=3)	SD (n=3)
	FGF2 signal	0	PM	2235856	1993372	2269947	2.16639e+06	150806		103.206	92.0135	104.78	100	6.96115
		0	PIP2	1002344	957826	1209071	1.05641e+06	134066		44.8304	48.0505	53.2643	48.7151	4.25601
		2.5	PIP2	1169692	989086	1327206	1.16199e+06	169191		52.3152	49.6187	58.4686	53.4675	4.53606
		5	PIP2	1152446	1065910	1227933	1148763	81074.3		51.5438	53.4727	54.0952	53.0373	1.33027
		12.5	PIP2	1240024	1066263	1284243	1.19684e+06	115227		55.4608	53.4904	56.5759	55.1757	1.56238
		25	PIP2	1176153	973011	1260492	1136552	147775		52.6041	48.8123	55.5296	52.3153	3.36793
		50	PIP2	1111044	987616	1224869	1107843	118659		49.6921	49.545	53.9602	51.0658	2.50776
		100	PIP2	1321117	1127850	1233055	1.22734e+06	96760.1		59.0877	56.58	54.3209	56.6629	2.38452
		175	PIP2	1222221	1128190	1257551	1202654	66863.4		54.6646	56.5971	55.4	55.5539	0.975393
		250	PIP2	1153900	1285900	1230524	1.22344e+06	66284.4		51.6089	64.5088	54.2094	56.7757	6.82212
