# Supplementary material for: Key steps in unconventional secretion of fibroblast growth factor 2 reconstituted with purified components
Source: eLife. 2017 Jul 19;6:e28985. doi: 10.7554/eLife.28985 (PMC5601999; doi:10.7554/eLife.28985)
Supplement: Figure 6—source data 1. — This source file provides raw and normalized data of SDS-PAGE and Coomassie analysis (Li-COR Odyssey infrared imaging system) with calculations of mean values with standard deviations that are plotted in Figure 6B. Furthermore, corrected fluorescent units of individual experiments (each experiment represents the mean of a duplicate) plus calculations of mean values with standard deviations of FACS-based experiments that are shown in Figure 6C are given. DOI: http://dx.doi.org/10.7554/eLife.28985.010 [file elife-28985-fig6-data1.xlsx]

## Sheet: Fig. 6B
Figure 6B
Sample		raw data			bound*5/(bound*5+unbound*20)*100
FGF2-Y81pCMF-GFP		Exp.1	Exp.2	Exp.3	Exp.1	Exp.2	Exp.3	Mean (n=3)	SD (n=3)
-WT	Bound	3922768	2390299	2163701	98.8553	96.3133	97.9619	97.7102	1.28955
-WT	Unbound	11356	22874	11254	1.1447	3.68669	2.03811
-C77A,C95A	Bound	3788461	2247156	2011160	99.1	93.0248	97.9193	96.6814	3.22124
-C77A,C95A	Unbound	8601	42124	10684	0.899953	6.97518	2.08073
-K127Q,R128Q,K133Q	Bound	677938	14589	10017	15.0201	0.351883	0.288966	5.22031	8.48691
-K127Q,R128Q,K133Q	Unbound	958902	1032847	864120	84.9799	99.6481	99.711
-K127Q,R128Q	Bound	3285575	3239601	2537773	91.2842	89.0183	93.4822	91.2615	2.23203
-K127Q,R128Q	Unbound	78427	99913	44235	8.71585	10.9817	6.51782
IL-1β_GFP	Bound	678339	36544	3104	14.1347	0.969016	0.0819348	5.06188	7.86979
IL-1β_GFP	Unbound	1030192	933676	946319	85.8653	99.031	99.9181
GFP	Bound	729209	6639	71601	24.6024	0.249893	2.44935	9.10055	13.47
GFP	Unbound	558691	662524	712915	75.3976	99.7501	97.5506
B	Bound	20% of sample loaded
UB	Unbound	5% of sample loaded
Figure 6C
corrected fluorescent units
FGF2-Y81pCMF-GFP-	PM+2PIP2						PM
one Exp. = mean of duplicate	Exp.1	Exp.2	Exp.3	Exp.4	Mean (n=4)	SD (n=4)	Exp.1	Exp.2	Exp.3	Exp.4	Mean (n=4)	SD (n=4)
WT	150.82	203.19	231.49	164.65	187.537	36.7371	1.48	1.7	1.4	1.9	1.62	0.225684
C77/95A	58.46	67.65	101.78	61.67	72.39	19.96	2.01	1.39	1.09	1.83	1.58	0.417772
K127Q, R128Q	2.6	2.37	2.73	2.13	2.4575	0.264244	1.36	1.33	1.2	2.19	1.52	0.452032
K127Q,R128Q,K133Q	3.24	2.61	3.31	2.4	2.89	0.453652	1.86	1.4	1.56	1.86	1.67	0.22891
IL-1β-GFP	3.1	3.04	4.84	2.33	3.3275	1.06725	2.8	2.2	0.86	2.04	1.975	0.812137
GFP	3.21	2.75	4.2	2.11	3.0675	0.879484	2.86	2.04	1.21	1.95	2.015	0.675006
normalized data	PM+2PIP2						PM
% of FGF2-Y81pCMF-GFP-WT	Exp.1	Exp.2	Exp.3	Exp.4	Mean (n=4)	SD (n=4)	Exp.1	Exp.2	Exp.3	Exp.4	Mean (n=4)	SD (n=4)
WT	80.4212	108.346	123.437	87.7958	100	19.5892	0.981302	0.836655	0.604778	1.15396	0.894175	0.23248
C77/95A	38.7614	33.294	43.9673	37.4552	38.3695	4.40025	1.33271	0.684089	0.470863	1.11145	0.899779	0.392738
K127Q, R128Q	1.72391	1.1664	1.17932	1.29365	1.34082	0.261718	0.901737	0.65456	0.518381	1.33009	0.851193	0.356525
K127Q,R128Q,K133Q	2.14826	1.28451	1.42987	1.45764	1.58007	0.386325	1.23326	0.68901	0.673895	1.12967	0.931458	0.291828
IL-1β-GFP	2.05543	1.49614	2.0908	1.41512	1.76437	0.358328	1.85652	1.08273	0.371506	1.23899	1.13744	0.6102
GFP	2.12836	1.35341	1.81433	1.28151	1.6444	0.399777	1.8963	1.00399	0.522701	1.18433	1.15183	0.569489
