# Supplementary material for: Key steps in unconventional secretion of fibroblast growth factor 2 reconstituted with purified components
Source: eLife. 2017 Jul 19;6:e28985. doi: 10.7554/eLife.28985 (PMC5601999; doi:10.7554/eLife.28985)
Supplement: Figure 9—source data 1. — This source file provides additional information on each sample including number of experiments performed, number of GUVs analyzed in each single experiment, original counts and percentage of GUVs positive for the small tracer or FGF2 translocation, respectively, as well as calculations of mean values with standard deviations plotted in Figure 9. DOI: http://dx.doi.org/10.7554/eLife.28985.014 [file elife-28985-fig9-data1.xlsx]

## Sheet: Fig. 9
Figure 9
Sample								positive for	positive for	% of GUVs positive for			Chart Fig.9	Alexa tracer			Translocation
FGF2-Y81pCMF-GFP	long-chain Heparin	PIP2	Cholesterol	heparin disaccharide	Ni-NTA		GUVs counted	Alexa tracer	Translocation	Alexa tracer	Translocation			Mean	SD	n	Mean	SD	n
-WT	-	+	+	-	-	Exp.1	88	28	3	31.8182	3.40909		PIP2 NO H +WT	32.779	10.872	15	1.487	1.24	15
						Exp.2	29	6	0	20.6897	0		PIP2+H+WT	29.631	10.964	17	23.12	7.259	17
						Exp.3	46	27	1	58.6957	2.17391		PIP2+DS+WT	41.704	12.425	5	4.743	2.671	5
						Exp.4	119	50	3	42.0168	2.52101		PIP2 noCholesterol+H+WT	16.685	5.735	6	6.357	3.007	6
						Exp.5	85	30	0	35.2941	0		noPIP2+H+WT	1.533	1.328	3	0	0	3
						Exp.6	95	34	1	35.7895	1.05263		Ni WT +H	10	6.482	3	0.667	0.611	3
						Exp.7	104	35	1	33.6538	0.961538		C77/95A+H	11.3	9.832	3	10.1	8.788	3
						Exp.8	59	12	0	20.339	0		K127Q/R128Q/K133Q +H	15.567	0.802	3	0	0	3
						Exp.9	56	16	1	28.5714	1.78571		K127Q/R128Q +H	26.367	0.666	3	1.567	0.058	3
						Exp.10	73	20	1	27.3973	1.36986		IL-1β-GFP +H	3.1	2.207	3	0	0	3
						Exp.11	89	35	1	39.3258	1.1236		GFP +H	1.375	0.386	4	0	0	4
						Exp.12	64	15	2	23.4375	3.125
						Exp.13	57	20	2	35.0877	3.50877
						Exp.14	25	4	0	16	0
						Exp.15	85	37	1	43.5294	1.17647
						Mean				32.7764	1.48051
						SD				10.8701	1.24345
						n				15	15
-WT	+	+	+	-	-	Exp.1	26	6	6	23.0769	23.0769
						Exp.2	30	11	10	36.6667	33.3333
						Exp.3	49	26	15	53.0612	30.6122
						Exp.4	101	53	42	52.4752	41.5842
						Exp.5	90	31	25	34.4444	27.7778
						Exp.6	96	38	26	39.5833	27.0833
						Exp.7	65	14	13	21.5385	20
						Exp.8	39	9	6	23.0769	15.3846
						Exp.9	83	15	15	18.0723	18.0723
						Exp.10	63	20	14	31.746	22.2222
						Exp.11	37	6	5	16.2162	13.5135
						Exp.12	49	15	10	30.6122	20.4082
						Exp.13	38	10	8	26.3158	21.0526
						Exp.14	51	10	8	19.6078	15.6863
						Exp.15	52	14	13	26.9231	25
						Exp.16	120	34	26	28.3333	21.6667
						Exp.17	91	19	15	20.8791	16.4835
						Mean				29.5664	23.1152
						SD				10.9257	7.26074
						n				17	17
-WT	-	+	+	+	-	Exp.1	125	51	8	40.8	6.4
						Exp.2	101	56	6	55.4455	5.94059
						Exp.3	51	15	3	29.4118	5.88235
						Exp.4	91	27	5	29.6703	5.49451
						Exp.5	47	25	0	53.1915	0
						Mean				41.7038	4.74349
						SD				12.425	2.67109
						n				5	5
-WT	+	+	-	-	-	Exp.1	61	14	6	22.9508	9.83607
						Exp.2	54	11	2	20.3704	3.7037
						Exp.3	66	8	3	12.1212	4.54545
						Exp.4	74	13	6	17.5676	8.10811
						Exp.5	77	15	7	19.4805	9.09091
						Exp.6	105	8	3	7.61905	2.85714
						Mean				16.6849	6.3569
						SD				5.73508	3.00717
						n				6	6
-WT	+	-	+	-	-	Exp.1	86	2	0	2.32558	0
						Exp.2	104	0	0	0	0
						Exp.3	88	2	0	2.27273	0
						Mean				1.53277	0
						SD				1.32768	0
						n				3	3
-WT	+	-	+	-	+	Exp.1	91	4	0	4.3956	0
						Exp.2	129	11	1	8.52713	0.775194
						Exp.3	82	14	1	17.0732	1.21951
						Mean				9.99864	0.664902
						SD				6.46561	0.617192
						n				3	3
-C77/95A	+	+	+	-	-	Exp.1	22	0	0	0	0
						Exp.2	25	4	4	16	16
						Exp.3	84	15	12	17.8571	14.2857
						Mean				11.2857	10.0952
						SD				9.81773	8.78465
						n				3	3
-K127Q,R128Q,K133Q	+	+	+	-	-	Exp.1	27	4	0	14.8148	0
						Exp.2	55	9	0	16.3636	0
						Exp.3	103	16	0	15.534	0
						Mean				15.5708	0
						SD				0.775067	0
						n				3	3
-K127Q,R128Q	+	+	+	-	-	Exp.1	135	36	2	26.6667	1.48148
						Exp.2	125	32	2	25.6	1.6
						Exp.3	127	34	2	26.7717	1.5748
						Mean				26.3461	1.55209
						SD				0.648276	0.0624372
						n				3	3
IL-1β-GFP	+	+	+	-	-	Exp.1	104	3	0	2.88462	0
						Exp.2	102	1	0	0.980392	0
						Exp.3	56	3	0	5.35714	0
						Mean				3.07405	0
						SD				2.19452	0
						n				3	3
GFP	+	+	+	-	-	Exp.1	72	1	0	1.38889	0
						Exp.2	108	2	0	1.85185	0
						Exp.3	85	1	0	1.17647	0
						Exp.4	104	1	0	0.961538	0
						Mean				1.34469	0
						SD				0.380469	0
						n				4	4
