# Supplementary material for: Key steps in unconventional secretion of fibroblast growth factor 2 reconstituted with purified components
Source: eLife. 2017 Jul 19;6:e28985. doi: 10.7554/eLife.28985 (PMC5601999; doi:10.7554/eLife.28985)
Supplement: Figure 11—source data 1. — This source file provides peak intensities that were used to determine the number of monomers per cluster and the brightness of the StarRed monomer control (see ‘Material and methods’ for detail). In addition, original data of FRAP experiments mentioned in the text to Figure 11 are shown. DOI: http://dx.doi.org/10.7554/eLife.28985.017 [file elife-28985-fig11-data1.xlsx]

## Sheet: Fig. 11
Figure 11
FGF2-Y81pCMF-HALO-StarRed				FGF2-Y81pCMF-C7795A-HALO-StarRed				Monomer control		FRAP
Peak Intensity	Monomers per Cluster	Sample		Peak Intensity	Monomers per Cluster	Sample		mEGFP-HALO-StarRed		time [s]	Normalizes Fl. Recovery
154.809	8.60047	1		53.223	2.95684	1		Brightness [kHz]		0.206	0.261778
129.001	7.16674	1		29.6796	1.64887	1		32.8269		0.412	0.29066
165.57	9.19832	1		33.853	1.88072	2		25.2184		0.618	0.345965
197.973	10.9985	1		39.7877	2.21043	2		7.77899		0.824	0.403113
66.0873	3.67152	1		63.6251	3.53473	3		18.0418		1.03	0.466407
70.5076	3.91709	1		30.2379	1.67988	4		60.4015		1.236	0.526014
109.131	6.06283	1		37.9526	2.10848	4		15.2175		1.442	0.535846
105.203	5.84463	1		68.1338	3.78521	5		29.9008		1.648	0.522941
168.461	9.35894	1		37.3274	2.07374	5		45.1931		1.854	0.549365
138.136	7.67422	1		28.9551	1.60862	5		31.7866		2.06	0.585006
174.69	9.705	1		25.4158	1.41199	5		14.0296		2.266	0.607128
133.319	7.40663	1		43.0395	2.39108	5		22.1614		2.472	0.616346
530.928	29.496	1		45.843	2.54683	5		14.5885		2.678	0.621876
89.8367	4.99093	1		32.9829	1.83238	5		24.4417		2.884	0.592995
201.757	11.2087	1		40.1352	2.22973	6		29.436		3.09	0.671651
99.1812	5.51007	1		53.7527	2.98626	6		20.1421		3.296	0.729414
155.431	8.63504	1		47.8027	2.65571	7		23.6676		3.502	0.658132
249.327	13.8515	1		40.8951	2.27195	7		25.3813		3.708	0.762597
62.8581	3.49212	1		38.8768	2.15982	7		44.2397		3.914	0.747849
193.922	10.7734	1		52.2926	2.90515	7		14.6025		4.12	0.717124
513.252	28.514	1		41.1526	2.28625	7		10.9592		4.326	0.736174
124.084	6.89356	1		60.4638	3.3591	7		55.0905		4.532	0.723269
83.9321	4.6629	1		31.4824	1.74902	8		30.1408		4.738	0.734945
98.7437	5.48576	1		55.4426	3.08014	9		20.5753		4.944	0.785334
87.0438	4.83577	1		45.8529	2.54739	9		22.1205		5.15	0.74109
117.181	6.51004	1						64.8983		5.356	0.806841
96.254	5.34745	1						25.8133		5.562	0.723269
201.968	11.2204	1						18.311		5.768	0.794551
91.4158	5.07866	1						15.0123		5.974	0.822819
38.502	2.139	1						28.9487		6.18	0.801311
142.244	7.90246	1						18.6788		6.386	0.816059
188.069	10.4483	1						14.6474		6.592	0.840639
73.3512	4.07507	1						29.6342		6.798	0.811757
145.445	8.08029	1						24.864		7.004	0.869521
93.2618	5.18121	1						32.3024		7.21	0.796395
121.684	6.76022	1						20.3987		7.416	0.889185
31.0337	1.7241	1						22.2619		7.622	0.842483
114.685	6.37137	1						12.1442		7.828	0.852929
62.4094	3.46719	1						13.3665		8.034	0.79578
55.7887	3.09937	1						28.8003		8.24	0.865219
152.373	8.46519	1						13.1206		8.446	0.90086
93.0772	5.17095	1						32.6096		8.652	0.915608
124.407	6.9115	1						34.4066		8.858	0.892872
220.385	12.2436	1						23.4352		9.064	0.844941
155.68	8.64888	1						13.7363		9.27	0.849242
135.244	7.51355	1						26.0826		9.476	0.893486
164.991	9.16615	1						18.8593		9.682	0.857231
59.6269	3.3126	1						27.9931		9.888	0.87628
419.14	23.2855	1						8.62019		10.094	0.948177
45.5115	2.52842	1						21.8253		10.3	0.873822
137.34	7.63002	1						41.4464		10.506	0.866448
78.1301	4.34056	1						22.1051		10.712	0.921139
59.5055	3.30586	1						22.2648		10.918	0.905162
69.944	3.88578	1						29.4741		11.124	0.881811
260.139	14.4521	1						25.784		11.33	0.935272
666.149	37.0083	1						21.9838		11.536	0.973986
72.0583	4.00324	1						23.5213		11.742	0.927898
127.769	7.09827	1						28.1166		11.948	0.941417
64.2409	3.56894	1						16.7707		12.154	0.935272
34.0985	1.89436	1						20.1891		12.36	0.897173
56.719	3.15105	1						19.7374		12.566	0.889799
309.472	17.1929	1						17.1353		12.772	0.917452
468.636	26.0353	1						21.6599		12.978	0.910078
310.811	17.2673	1						30.0876		13.184	0.987505
99.4949	5.5275	1						35.3749		13.39	0.89533
498.302	27.6834	1						12.367		13.596	0.916837
57.3696	3.1872	1						9.97916		13.802	0.965383
290.843	16.158	1						16.9511		14.008	0.941417
64.3811	3.57673	1						28.3402		14.214	0.921753
177.048	9.83598	1						16.6201		14.42	0.910078
111.98	6.2211	1						26.3418		14.626	0.905776
40.8084	2.26713	1						18.4784		14.832	0.918066
158.287	8.79373	1						19.334		15.038	0.91315
79.2845	4.40469	1						35.0224		15.244	0.88857
195.824	10.8791	1						28.0714		15.45	0.92544
118.202	6.56677	1						11.2923		15.656	0.866448
30.1886	1.67714	1						7.97122		15.862	0.879967
30.9363	1.71868	1						17.8443		16.068	0.911921
196.819	10.9344	1						29.6812		16.274	0.917452
196.254	10.903	1						31.7245		16.48	0.943261
66.7648	3.70916	1						19.6758		16.686	0.96907
256.385	14.2436	1						23.9228		16.892	0.967227
109.401	6.07782	1						18.0794		17.098	0.875051
83.4028	4.63349	1						21.2485		17.304	0.918681
352.429	19.5794	1						23.5272		17.51	0.929127
135.596	7.53311	1						22.4722		17.716	0.918066
46.7823	2.59902	1						5.40759		17.922	0.889185
43.9579	2.44211	1						44.7014		18.128	0.928513
162.451	9.02506	1						17.1051		18.334	0.916223
79.9244	4.44025	1						15.2499		18.54	0.975215
68.8107	3.82282	1						21.869		18.746	0.93773
56.4561	3.13645	1						23.5056		18.952	0.926669
125.244	6.95801	1						41.248		19.158	0.929742
50.6048	2.81138	1						14.5093		19.364	0.989963
33.2328	1.84626	1						44.9614		19.57	0.964154
49.4842	2.74912	1						8.42516		19.776	0.965383
179.287	9.96042	1						12.3251		19.982	0.983204
77.6502	4.3139	1						24.0998		20.188	0.949406
103.259	5.73664	1						28.9319		20.394	0.94449
198.318	11.0177	1						37.3732		20.6	1.03236
54.4617	3.02565	1						15.5567
344.32	19.1289	1						12.2839
216.495	12.0275	1						18.1999
33.0255	1.83475	1						26.9352
140.059	7.78104	1						11.3673
169.094	9.39409	1						27.9726
195.159	10.8422	1						16.9709
190.659	10.5922	1						20.9539
210.555	11.6975	1						24.0758
259.471	14.4151	1						31.7553
268.354	4.4923	1						18.1955
216.792	12.044	1						23.9618
185.883	10.3268	1						12.915
120.385	6.68803	1						19.9292
58.8848	3.27138	1						17.3988
72.4574	4.02541	1						11.0539
743.375	41.2986	1						22.9368
150.374	8.35409	1						9.154
107.581	5.97675	1						9.86557
54.7094	3.03941	1						61.5602
97.2794	5.40441	1						17.3282
113.307	6.29486	1						19.8646
352.688	19.5938	1						35.6477
54.7318	3.04066	1						25.2122
160.693	8.92737	1						26.4923
85.6582	4.75879	1						19.0215
357.552	19.864	1						19.1193
200.791	11.155	1						17.6425
51.9426	2.8857	1						26.3053
63.7607	3.54226	1						24.0404
98.3598	5.46443	1						14.1576
109.504	6.08357	1						18.1086
627.062	34.8368	1						13.8781
197.293	10.9607	1						21.3621
203.993	11.3329	1						31.8923
158.261	8.79227	1						31.8664
103.464	5.74798	1						34.5017
102.099	5.67218	1						28.5916
51.1624	2.84236	1						32.6837
354.499	19.6944	1						39.9523
31.8974	1.77208	1						29.5088
152.199	8.45552	1						16.4591
62.0209	3.44561	1						15.6285
140.685	7.81583	1						22.7655
143.878	7.99322	1						19.0218
109.337	6.07428	1						31.4904
192.572	10.6984	1						36.6879
98.7212	5.48451	1						13.2745
95.1775	5.28764	1						15.7192
147.244	8.18023	1						32.0425
52.631	2.92394	1						30.1216
274.667	15.2593	1						23.7371
167.519	9.30661	1						32.147
96.757	5.37539	1						23.0398
109.332	6.07397	1						19.4152
288.597	16.0331	1						26.9459
109.939	6.10774	1						14.3799
139.249	7.73604	1						40.0367
551.584	30.6436	1						23.1705
90.0769	5.00427	1						29.6389
42.043	2.33572	1						21.4329
258.624	14.368	1						24.5657
60.1953	3.34418	1						28.7429
430.28	23.9044	1						21.5078
137.908	7.66154	1						18.3155
252.526	14.0292	1						30.8204
141.539	7.86326	1						32.3172
122.815	6.82306	1						11.868
289.921	16.1067	1						19.4564
236.392	13.1329	1						25.7618
299.496	16.6387	1						17.9521
138.062	7.67011	1						55.0968
98.5838	5.47688	1						35.1066
77.4247	4.30137	1						16.5179
86.8866	4.82703	1						7.4825
197.252	10.9584	1						23.9909
313.265	17.4036	1						24.2071
36.9995	2.05553	1						31.7612
115.77	6.43165	1						14.3476
91.0727	5.0596	1						14.9662
258.333	14.3518	1						46.4786
219.331	12.185	1						17.2483
119.386	2.39255	1						41.7008
165.57	9.19832	1						28.608
98.405	5.46694	1						21.4175
120.469	6.6927	1						9.54199
93.1282	5.17379	1						36.3206
107.985	5.99916	1						20.644
142.235	7.90196	1						17.779
269.236	14.9576	1						15.018
36.8063	2.04479	1						47.2325
236.112	13.1174	1						41.3593
99.5129	5.52849	1						30.2751
357.705	19.8725	1						34.6527
313.657	17.4254	1						28.838
38.0893	0.536118	1						19.1369
191.961	10.6645	1						21.8485
106.068	5.89266	1						36.6567
234.398	13.0221	1						20.8627
74.3626	4.13126	1						18.5446
159.184	8.84357	1						24.6601
160.57	8.92055	1						14.4281
83.2509	4.62505	1						28.2292
87.9935	4.88853	1						23.52
66.7362	3.70756	1						12.958
133.382	7.41014	2						48.7009
82.7043	4.59468	2						4.25552
26.2782	1.4599	2						22.7643
134.093	7.44958	2						23.0272
142.195	7.89971	2						11.893
169.004	9.38911	2						27.9657
38.1284	2.11825	2						19.1339
168.675	9.37082	2						23.9878
91.5637	5.08687	2						67.0666
68.1197	3.78443	2						27.0751
134.579	7.47663	2						23.518
195.53	10.8628	2						31.6858
126.729	7.0405	2						10.6009
25.3436	0.361562	2						19.708
45.8029	2.5446	2						23.7197
118.534	6.5852	2						13.3777
86.185	4.78806	2						17.3813
114.393	6.35517	2						47.2211
143.99	7.99946	2						18.3348
106.597	5.92203	2						31.2445
143.44	7.96891	2						60.8879
116.299	6.46106	2						32.3251
50.3983	2.79991	2						42.3016
87.5581	4.86434	2						26.8094
94.7693	5.26496	2						15.4091
177.284	9.84911	2						23.2379
254.122	14.1179	2						26.8803
157.226	8.73475	2						13.0481
57.0682	3.17046	2						24.7935
29.3506	1.63059	2						25.4802
56.5445	3.14136	2						25.1387
17.5585	0.975472	2						19.2421
70.0275	3.89041	2						12.8762
296.215	16.4564	2						23.1735
59.4613	1.50119	2						11.4268
53.5571	2.97539	2						11.8457
226.906	12.6059	2						23.933
223.773	12.4318	2						24.2722
107.526	5.97367	2						35.3017
79.742	4.43011	2						27.4965
88.2405	4.90225	2						23.2419
123.166	6.84255	2						24.0598
102.758	5.70877	2						21.3676
214.825	11.9347	2						20.2953
150.808	8.37821	2						25.5532
95.3619	5.29788	2						13.9455
157.909	8.77272	2						23.1378
68.2858	3.79365	2						30.1306
100.763	5.59793	2						24.4134
90.6817	5.03787	2						30.9762
63.542	3.53011	2						23.2045
36.3263	2.01813	2						27.6628
80.7307	1.40688	2						28.9925
341.21	18.9561	2						23.751
116.549	6.47496	2						36.474
67.2894	3.7383	2						11.5876
144.827	8.04594	2						18.6782
53.7346	2.98526	2						11.4411
223.767	12.4315	2						30.6413
220.188	12.2327	2						11.7138
79.5641	4.42023	2						15.8587
141.577	7.86541	2						41.0969
1167.78	64.8764	2						15.0599
170.804	9.48909	2						9.71507
149.822	8.32346	2						15.2918
108.571	6.0317	2						14.4323
117.183	6.51019	2						48.0013
92.5687	5.14271	2						25.8359
104.376	5.79867	2						48.3493
232.073	12.893	2						28.8639
454.808	25.2671	2						15.4506
97.6004	5.42225	2						40.7109
2394.03	133.001	2						29.7215
103.211	5.73395	2						26.7254
63.9659	3.55366	2						29.4514
183.423	10.1902	2						16.012
91.6661	5.09256	2						20.2819
86.6927	4.81626	2						15.5742
139.926	7.77366	2						16.5472
148.346	8.24145	2						22.8893
772.253	42.903	2						18.1398
99.0696	2.26076	2						20.739
52.5542	2.91968	2						31.4431
164.826	9.15698	2						19.0634
335.138	18.6188	2						19.6045
353.185	19.6214	2						27.5435
510.887	28.3826	2						43.1728
130.08	7.22666	2						22.2729
35.3781	1.96545	2						18.8958
162.78	9.04331	2						36.051
124.222	6.9012	2						21.4573
111.25	6.18054	2						17.7445
151.392	8.41068	2						18.3466
60.9775	3.38764	2						31.4625
25.1035	1.39464	2						25.3785
51.1577	2.8421	2						19.0923
113.156	6.28643	2						8.55347
254.135	14.1186	2						22.9759
208.474	11.5819	2						39.7666
61.6304	1.10022	2						18.7636
46.9107	2.60615	2						22.9778
63.683	3.53795	2						34.212
236.747	13.1526	2						26.2131
88.8537	4.93632	2						9.69362
342.235	19.013	2						65.7501
117.766	6.54254	2						18.3647
44.6248	2.47916	2						28.5328
429.573	23.8652	2						19.3003
260.265	14.4591	2						30.9673
109.852	6.10289	2						26.2449
92.7182	5.15101	2						26.9992
65.4852	3.63807	2						18.1779
118.016	6.55646	2						21.3601
130.239	7.2355	2						10.9843
183.086	10.1714	2						25.8619
81.9241	4.55134	2						13.3841
21.4597	1.1922	2						19.047
81.8647	4.54804	2						12.8903
125.96	6.99777	2						23.5929
117.15	6.50835	2						19.8687
188.255	10.4586	2						18.1386
41.9348	2.32971	2						24.0636
177.482	9.86011	2						14.0368
62.6141	3.47856	2						18.973
178.44	9.91334	2						26.312
175.833	9.76853	2						20.7554
73.7653	4.09807	2						18.7755
85.2289	4.73494	2						16.8543
108.974	6.05412	2						25.5694
45.3915	2.52175	2						16.3227
142.354	7.90856	2						20.0933
63.2219	3.51233	2						23.1639
50.4469	2.80261	2						9.11106
117.834	6.54631	2						38.1286
193.932	10.774	2						30.5839
118.992	6.61068	2						21.0245
86.8713	4.82618	2						32.7069
357.462	19.859	2						17.2118
35.9076	1.99486	2						16.9332
99.4787	5.52659	2						20.5843
98.257	5.45872	2						32.3442
90.2293	5.01274	2						23.0225
98.6369	5.47983	2						19.3555
101.796	5.65535	2						11.7736
626.771	34.8206	2						23.8863
120.68	6.70447	2						17.221
236.205	13.1225	2						16.7253
87.8269	4.87927	2						26.9386
91.1091	5.06161	2						13.6594
210.289	11.6827	2						12.6463
154.817	8.60094	2						19.422
108.11	6.00612	2						15.7551
115.486	6.41589	2						15.1126
385.461	21.4145	2						45.9149
135.311	7.51729	2						24.8536
115.916	6.43975	2						13.6494
77.4829	4.30461	2						23.9173
151.889	8.43828	2						22.6558
233.613	12.9785	2						10.8275
120.772	6.70958	2						61.5035
82.2645	4.57025	2						29.3739
127.662	7.09236	2						13.8917
82.7378	4.59655	2						16.2366
95.6572	5.31429	2						37.3316
82.8819	4.60455	2						22.9373
195.664	10.8702	2						5.78192
48.1039	2.67244	2						21.9845
99.2094	5.51163	2						23.9393
56.6837	3.14909	2						22.2215
107.27	5.95945	2						22.7836
107.18	5.95447	2						30.3042
160.496	8.91642	2						16.3881
68.8707	3.82615	2						9.97386
77.1706	4.28725	2						23.3893
90.056	5.00311	2						22.2181
92.8145	5.15636	3						25.1059
257.762	14.3201	3						22.4804
85.8792	4.77106	3						29.1906
128.722	7.15121	3						22.2084
131.474	7.3041	3						18.5316
77.3699	4.29833	3						43.8925
73.6237	4.09021	3						13.7664
87.9393	4.88552	3						12.0257
71.3274	3.96263	3						18.1365
63.5979	3.53322	3						39.7046
87.6675	4.87042	3						19.1433
38.9918	2.16621	3						31.8262
189.921	10.5512	3						12.6092
50.6151	2.81195	3						23.3425
42.3594	2.3533	3						8.85368
94.3435	5.24131	3						31.1916
26.329	1.46272	3						17.9883
96.6257	5.3681	3						25.1917
97.2796	5.40442	3						28.4324
83.9077	4.66154	3						19.0746
50.1292	2.78495	3						9.47808
112.001	6.22229	3						28.1948
154.097	8.56092	3						23.8721
55.123	3.06239	3						29.868
68.7597	3.81999	3						19.9048
83.7999	4.65555	3						22.9407
123.32	6.8511	3						23.2545
793.418	44.0788	3						14.9588
136.952	7.60842	3						29.4056
103.718	5.76213	3						26.1363
240.984	13.388	3						28.2247
82.5834	4.58796	3						22.9261
175.665	9.75917	3						20.9709
350.236	19.4575	3						14.2475
168.125	9.34026	3						30.6607
208.863	11.6035	3						14.6599
75.4377	4.19098	3						28.2952
71.7401	3.98556	3						21.311
209.353	11.6307	3						20.2392
72.5231	4.02906	3						21.6852
224.231	12.4573	3						32.8039
128.64	7.14668	3						18.2838
407.213	22.623	3						17.2442
62.1564	3.45313	3						11.7306
732.969	40.7205	3						28.4367
178.567	9.92037	3						28.016
52.8988	1.44218	3						22.7087
107.466	5.97035	3						16.0678
282.096	15.672	3						25.5381
93.4194	5.18997	3						68.892
61.6218	3.42344	3						24.9964
112.016	6.22313	3						32.5367
38.6722	2.14846	3						44.3661
39.9186	2.2177	3						18.106
165.372	9.18736	3						61.8902
176.263	9.79239	3						10.7706
41.1642	2.2869	3						26.5841
51.104	2.83911	3						12.0954
102.107	5.6726	3						47.9216
37.9417	2.10787	3						12.1102
80.3957	4.46643	3						11.8824
149.598	8.311	3						18.4488
131.05	7.28054	3						69.0794
129.279	7.18218	3						27.7692
117.783	6.5435	3						23.6379
204.185	11.3436	3						21.9731
112.568	6.25377	3						11.5746
105.631	5.86841	3						22.8259
56.4733	3.13741	3						20.3554
364.826	20.2681	3						6.62594
178.403	9.91128	3						35.7334
46.9963	2.6109	3						12.6036
41.4197	2.30109	3						28.6896
104.875	5.82641	3						20.4304
108.333	6.01851	3						27.9889
496.609	27.5894	3						12.8046
99.7221	5.54012	3						19.8986
126.439	7.02438	3						12.8758
21.0641	1.17023	3						27.8381
287.752	15.9862	3						21.025
130.26	7.23669	3						18.423
139.884	7.77131	3						20.6835
197.167	10.9537	3						35.4371
150.422	8.35677	3						26.0506
94.5199	5.2511	3						17.9442
54.6191	3.0344	3						20.4021
53.6296	2.97942	3						25.1121
186.982	10.3879	3						26.4457
282.382	15.6879	3						26.9896
320.912	17.8284	3						28.525
75.8406	4.21336	3						14.7246
118.844	6.60245	3						38.5407
92.2439	1.76766	3						9.17782
166.681	9.26006	3						29.3688
57.3254	3.18475	3						26.2862
70.4005	3.91114	3						22.8893
132.067	7.33705	3						27.7249
291.885	16.2158	3						68.7258
66.326	3.68478	3						33.2684
179.453	9.96961	3						9.16663
108.263	6.01463	3						27.6403
130.209	7.23384	3						43.0925
195.33	10.8517	3						23.4515
90.2045	5.01136	3						16.3037
130.075	7.22638	3						25.31
49.2071	2.73373	3						25.2936
55.1051	3.0614	3						31.0671
309.114	17.173	3						35.7447
194.963	10.8313	3						15.7595
121.686	6.76036	3						7.89844
58.4761	3.24867	3						17.05
287.088	15.9493	3						12.3336
178.332	9.90733	3						20.9997
58.9262	3.27368	3						15.7867
56.2759	3.12644	3						18.2867
153.634	8.53524	3						19.1831
151.325	8.40694	3						7.71076
78.7363	4.37424	3						12.5166
124.358	6.90878	3						12.5476
42.6818	2.37121	3						35.3427
610.901	33.939	3						11.8887
303.366	16.8537	3						27.4219
385.972	21.4429	3						32.2998
166.636	9.25755	3						9.4359
58.2537	3.23631	3						19.968
41.1523	2.28624	3						23.4992
179.891	9.99395	3						12.3929
343.974	19.1096	3						14.4241
280.327	15.5737	3						9.13339
126.612	7.03399	3						37.9047
55.0171	3.0565	3						26.5722
74.415	4.13416	3						16.9203
69.5328	3.86294	3						18.6154
39.8433	2.21351	3						23.8919
196.594	10.9219	3						27.4811
131.448	7.30266	3						16.4822
166.531	9.25174	3						17.7829
120.585	6.69919	3						23.413
60.3516	3.35287	3						18.198
118.18	6.56557	3						30.7648
358.126	19.8959	3						24.6945
111.188	6.17709	3						20.9377
86.2731	4.79295	3						20.0962
68.7771	3.82095	3						31.5285
39.6068	2.20038	3						13.0446
54.2189	3.01216	3						8.60585
43.3264	2.40702	3						35.3128
117.383	6.5213	3						18.3018
285.322	15.8512	3						26.8547
64.0799	3.55999	3						33.7518
145.213	8.06739	3						23.2244
155.635	8.64642	3						21.758
130.873	7.27074	3						19.8937
182.512	10.1396	3						25.4802
59.3274	3.29597	3						14.6774
126.474	7.02635	3						24.1329
161.95	8.9972	3						47.9549
171.739	9.54105	3						22.3429
60.0139	3.33411	3						30.1907
357.619	19.8677	3						21.5403
73.0328	4.05738	3						7.95732
114.774	6.37632	3						16.1034
90.2074	1.98043	3						21.6788
99.7451	5.5414	3						4.96346
88.3371	4.90762	3						43.6493
121.801	6.76674	3						20.9687
146.392	8.13286	3						50.4206
83.2796	4.62664	3						20.6373
105.743	5.87459	3						34.4418
144.825	8.04585	3						19.3954
82.0196	4.55665	3						25.4289
384.234	21.3463	3						14.1972
96.9083	5.38379	3						14.02
75.8086	4.21159	3						32.8964
41.9863	2.33257	3						20.4759
318.233	17.6796	3						33.5241
95.6094	5.31163	3						13.7923
37.4698	2.08165	4						14.1881
113.784	6.32135	4						14.3245
96.6987	5.37215	4						11.9477
43.3126	2.40626	4						22.5304
49.9973	2.77763	4						27.8269
143.333	7.96292	4						42.3585
123.938	6.88544	4						37.6476
137.439	7.63552	4						58.2721
174.159	9.6755	4						8.67091
145.057	8.05873	4						26.2838
37.1487	2.06382	4						12.5722
48.6624	2.70347	4						13.7496
104.362	5.79788	4						29.4491
81.8392	4.54662	4						17.4503
34.5337	1.91854	4						19.0108
100.183	5.5657	4						14.9713
102.653	5.70294	4						18.6528
79.4578	4.41432	4						13.4531
30.0059	1.667	4						63.5562
65.1772	3.62096	4						16.6164
96.8752	5.38196	4						21.2463
128.947	7.16375	4						17.6721
95.7985	5.32214	4						19.2351
183.566	10.1981	4						23.6377
108.981	6.05449	4						22.1
54.4406	3.02448	4						26.9904
256.457	14.2476	4						36.1794
108.811	6.04505	4						54.7988
189.23	10.5128	4						30.3196
70.9536	3.94187	4						8.51773
140.488	2.71058	4						35.3071
87.2856	4.8492	4						9.27444
85.2631	4.73684	4						25.2537
94.8998	5.27221	4						25.6476
21.7211	0.53723	4						17.9067
73.9492	4.10829	4						21.0068
170.985	9.49917	4						17.7842
69.1193	3.83996	4						17.7919
51.3076	2.85042	4						19.44
54.8534	3.04741	4						10.6741
42.9136	2.38409	4						19.142
41.7596	2.31998	4						15.1423
109.967	6.10929	4						19.1135
135.782	7.54347	4						14.8255
121.873	6.77071	4						11.4623
108.327	6.01817	4						15.6658
40.9542	2.27524	4						35.9025
56.9515	1.46006	4						45.2832
56.1339	3.11855	4						22.676
120.012	6.66732	4						17.1199
97.9443	5.44135	4						22.4721
88.4219	4.91233	4						17.1226
64.2411	3.56895	4						20.9369
108.57	6.03167	4						21.4609
110.619	6.14548	4						8.05063
35.2063	1.95591	4						18.4987
326.348	18.1304	4						16.3855
359.657	19.981	4						26.555
73.3856	4.07698	4						19.5415
72.5764	4.03202	4						21.3084
92.9297	5.16276	4						25.4459
106.475	5.91528	4						13.9685
590.933	32.8296	4						19.9213
114.856	6.38088	4						13.3012
219.863	12.2146	4						8.08041
84.3306	4.68503	4						23.2622
131.43	7.30169	4						20.2354
66.4389	3.69105	4						22.6713
80.9665	4.49814	4						48.8074
187.781	10.4323	4						13.2032
130.791	7.26619	4						23.2839
139.043	7.72459	4						57.0158
92.1281	5.11823	4						12.2425
90.5524	5.03069	4						20.0655
55.9272	3.10707	4						27.5187
120.445	6.69139	4						42.969
63.7224	3.54013	4						20.1761
62.1395	3.4522	4						13.6802
54.0589	0.920607	4						27.7564
350.232	19.4573	4						15.6166
66.315	3.68417	4						13.491
58.0953	3.22752	4						34.1208
103.011	5.72285	4						24.5547
120.284	6.68243	4						19.4738
35.1991	1.95551	4						22.7552
68.5496	3.80831	4						19.9493
53.2826	2.96014	4						19.9481
76.9844	1.32023	4						38.7372
125.624	6.9791	4						25.0045
63.8291	3.54606	4						34.4899
23.7018	1.31677	4						21.1702
55.5681	3.08712	4						20.2576
19.1541	0.329271	4						24.9115
62.6064	3.47814	4						16.9288
90.7663	5.04257	4						18.1123
187.131	10.3962	4						13.2784
206.546	11.4748	4						25.0529
53.3666	2.96481	4						13.2754
95.4241	5.30134	4						20.5251
454.858	25.2699	4						17.2468
176.005	9.77807	4						21.9759
147.463	8.19238	4						20.4319
127.781	7.09896	4						11.3692
296.048	16.4471	4						4.70801
54.3754	3.02086	4						29.3263
89.6371	4.97984	4						9.052
349.56	19.42	4						14.8375
234.652	13.0362	4						33.7494
166.898	9.27211	4						26.3563
49.6041	2.75579	4						13.5544
82.3911	4.57728	4						27.0612
226.556	12.5864	4						60.0782
55.3987	3.07771	4						19.1792
125.515	6.97308	4						21.8863
241.995	13.4442	4						36.04
100.813	5.60072	4						15.5936
99.5264	5.52924	4						8.5491
106.481	5.91561	4						24.4528
146.125	8.11805	4						19.8366
251.481	13.9712	4						13.5437
134.236	7.45755	4						15.1014
100.757	5.59759	4						26.4977
53.2692	2.9594	4						22.1918
95.5242	5.3069	4						38.4008
66.6474	3.70263	4						21.9154
46.512	2.584	4						23.6691
113.13	6.28498	4						28.0901
57.1667	3.17593	4						13.937
27.2035	1.51131	4						13.2772
101.612	5.6451	4						28.639
281.667	15.6482	4						22.4892
46.2301	2.56834	4						29.6437
182.102	10.1168	4						15.6905
33.7482	1.8749	4						9.85185
192.716	10.7065	4						32.2286
64.5954	3.58864	4						14.9496
28.8111	1.60062	4						26.7149
65.8373	3.65763	4						17.6722
99.2636	5.51464	4						23.7883
410.207	22.7893	4						19.1826
44.8348	2.49082	4						17.6579
44.039	2.44661	4						9.21347
112.514	6.25075	4						26.4233
67.9001	3.77223	4						28.2821
56.9281	3.16267	4						18.5339
413.078	22.9488	4						39.9304
45.7647	2.54248	4						11.8637
67.3342	3.74079	4						8.45355
87.3269	4.8515	4						14.9821
186.839	10.38	4						27.5362
89.4973	4.97207	4						9.55946
103.359	5.74217	4						24.9885
229.724	12.7625	4						14.3366
61.5711	3.42062	4						21.8744
148.265	8.23692	4						27.7566
130.414	7.24523	4						22.9976
63.8703	3.54835	4						17.7836
149.904	8.32802	4						19.0537
66.4011	3.68895	4						19.3203
39.8287	2.2127	4						23.7068
108.716	6.03978	4						21.1149
153.028	8.50153	4						25.4511
58.9892	3.27718	4						33.0845
60.02	3.33444	4						18.8603
49.9078	2.77266	4						15.5685
50.6391	2.81328	4						8.72422
30.4961	1.69423	4						27.7995
91.6588	5.09215	4						27.555
55.5187	3.08437	4						18.2716
93.7074	5.20597	4						12.0065
40.1394	2.22997	4						13.5618
141.883	2.30747	4						32.5946
159.422	8.85679	4						31.703
86.5736	4.80964	4						27.0132
35.4517	1.96954	4						23.8623
111.626	6.20143	4						23.2315
61.6203	3.42335	4						15.9294
45.3628	2.52015	4						46.5311
163.493	9.08296	5						15.7355
52.0888	2.89382	5						10.8227
49.1492	2.73051	5						36.9844
52.5752	2.92085	5						13.5398
181.98	10.11	5						7.1967
395.838	21.991	5						17.8665
38.6129	2.14516	5						24.5863
145.201	8.06671	5						10.1728
43.885	2.43805	5						39.6326
36.6165	2.03425	5						15.489
124.815	6.93419	5						22.6966
120.704	6.70577	5						22.1789
55.2993	3.07218	5						9.07777
182.509	10.1394	5						42.5138
100.39	5.57724	5						10.7761
61.7419	3.4301	5						29.3315
374.43	20.8017	5						10.2322
39.1193	2.1733	5						13.8714
26.9989	1.49994	5						21.0155
92.8412	5.15784	5						35.0736
72.5635	4.03131	5						15.4623
47.5566	2.64203	5						16.1807
296.942	16.4968	5						18.6116
83.605	4.64472	5						47.8067
49.5611	2.7534	5						21.6307
65.8443	1.26376	5						13.8883
68.1651	3.78695	5						7.43899
125.289	6.96053	5						19.2055
205.057	11.392	5						17.4414
121.968	6.77597	5						29.4611
50.5254	2.80696	5						25.0861
146.528	8.14046	5						22.7467
225.532	12.5296	5						16.8538
160.827	8.93483	5						12.0445
316.24	17.5689	5						38.5453
63.9054	3.5503	5						54.6796
80.7624	4.4868	5						13.0199
221.413	12.3007	5						19.4803
156.585	8.69916	5						8.86216
352.971	19.6095	5						22.0874
92.2324	5.12402	5						29.7019
58.1446	3.23025	5						32.3002
59.4369	3.30205	5						30.5724
56.9245	3.16247	5						15.6625
124.492	6.91623	5						11.6721
42.8735	2.38186	5						11.6104
54.2681	3.01489	5						18.9931
40.9548	2.27527	5						24.717
42.4761	2.35978	5						15.9171
235.919	13.1066	5						40.0237
125.323	6.96239	5						13.59
122.511	6.80615	5						18.209
112.925	6.2736	5						15.8244
99.8463	5.54702	5						23.6534
42.0909	2.33838	5						30.8567
94.5447	5.25248	5						42.7338
138.32	7.68444	5						27.306
224.189	12.455	5						17.6597
269.733	14.9852	5						29.3904
39.7416	0.677179	5						28.2743
65.4029	3.6335	5						14.0153
233.221	12.9567	5						16.7626
162.972	9.05402	5						30.7521
135.204	7.51135	5						6.38654
76.0373	4.22429	5						19.886
76.1269	4.22927	5						17.0145
84.938	4.71878	5						19.26
102.982	5.72122	5						31.412
61.3769	3.40983	5						24.118
48.7461	2.70812	5						16.798
168.727	9.37372	5						35.7159
35.4502	1.96946	5						11.2797
139.902	7.77233	5						17.1509
150.009	8.33385	5						28.0079
46.7696	2.59831	5						36.587
74.7045	4.15025	5						9.83483
52.2247	2.90137	5						16.0181
112.812	6.26733	5						18.4592
101.621	5.64562	5						32.9416
66.9219	3.71788	5						21.3427
70.0857	3.89365	5						50.2062
130.263	7.23683	5						18.4739
86.9144	4.82858	5						16.5344
57.3077	3.18376	5						11.0328
98.9077	5.49487	5						33.0897
113.992	6.3329	5						18.677
41.0533	2.28074	5						9.78219
44.0128	2.44516	5						22.0695
226.093	12.5607	5						20.7855
99.8823	5.54902	5						10.3529
99.182	5.51011	5						29.9423
53.3358	2.9631	5						18.2057
381.265	21.1814	5						10.9133
114.029	6.33496	5						20.5513
102.789	5.7105	5						22.2805
221.824	12.3236	5						29.0259
63.7654	3.54252	5
264.11	14.6728	5
40.9237	2.27354	5
44.1921	2.45512	5
246.755	13.7086	5
227.578	12.6432	5
151.989	8.44383	5
2163.8	120.211	5
47.4086	2.63381	5
35.6943	1.98301	5
112.377	6.24315	5
72.5662	4.03145	5
50.6885	2.81603	5
93.9957	5.22198	5
94.9384	5.27436	5
112.855	6.26971	5
96.0471	5.33595	5
45.2172	2.51207	5
218.734	12.1519	5
192.7	10.7056	5
98.1104	5.45058	5
261.577	14.5321	5
43.9034	2.43908	5
50.4089	2.80049	5
112.338	6.24099	5
305.479	16.9711	5
148.33	8.24055	5
97.8836	5.43798	5
128.287	7.12705	5
101.216	5.62311	5
131.139	7.28552	5
127.986	2.35912	5
56.1839	3.12133	5
130.192	7.23291	5
44.4516	2.46953	5
61.0073	3.3893	5
36.2237	2.01243	5
65.9394	3.6633	5
113.984	6.33246	5
131.515	7.30637	5
279.321	15.5178	5
45.5344	2.52969	5
38.4189	2.13438	5
241.865	13.437	5
257.657	14.3143	5
232.609	12.9227	5
81.4299	4.52388	5
35.1188	1.95104	5
39.582	2.199	5
36.2523	2.01402	5
67.609	3.75606	5
462.626	25.7015	5
89.1924	4.95513	5
45.0213	2.50118	5
63.4339	3.52411	5
154.498	8.58322	5
38.0531	2.11406	5
228.851	12.7139	5
40.1247	2.22915	5
32.7462	1.81924	5
89.0462	4.94701	5
64.1775	3.56542	5
58.2167	3.23426	5
298.593	16.5885	5
144.498	8.02767	5
65.7374	3.65208	5
38.0085	2.11158	5
260.755	14.4864	5
61.5382	1.36935	5
67.0681	3.726	5
104.487	5.80484	5
71.0823	3.94902	5
109.393	6.07737	5
56.4125	3.13403	5
63.4084	3.52269	5
78.3654	4.35363	5
138.495	7.69415	5
43.9098	2.43943	5
301.268	16.7371	5
197.933	10.9963	5
164.526	9.14034	5
73.2321	4.06845	5
37.899	2.1055	5
185.252	10.2918	5
75.9082	4.21712	6
159.481	8.86004	6
133.265	7.40359	6
102.756	5.70866	6
89.7392	4.98551	6
41.1346	2.28526	6
42.03	2.335	6
143.638	7.97991	6
119.8	6.65554	6
51.8528	2.88071	6
135.682	7.5379	6
165.931	9.21836	6
30.0129	1.66738	6
171.961	9.55341	6
43.4253	2.41252	6
81.66	4.53666	6
106.539	5.91882	6
34.1757	1.89865	6
278.206	15.4559	6
90.2766	5.01537	6
213.556	11.8642	6
234.305	13.0169	6
59.6528	3.31404	6
142.974	7.94299	6
75.6846	4.2047	6
171.509	9.5283	6
263.181	14.6212	6
51.024	2.83467	6
44.94	2.49667	6
89.7839	4.98799	6
64.825	3.60139	6
155.557	8.64208	6
96.1305	5.34059	6
90.7019	5.039	6
118.892	6.60513	6
136.063	7.55906	6
281.713	15.6507	6
109.683	6.09351	6
48.9719	2.72066	6
394.595	21.9219	6
28.4927	1.58293	6
96.9869	5.38816	6
191.293	10.6274	6
243.497	13.5276	6
166.84	9.26891	6
52.3773	2.90985	6
50.1139	2.7841	6
66.4328	3.69071	6
38.7974	2.15541	6
90.7096	5.03942	6
176.887	9.82705	6
70.4575	3.91431	6
75.4158	4.18977	6
54.1727	3.0096	6
603.591	33.5328	6
69.9921	3.88845	6
88.6586	4.92548	6
40.6666	2.25925	6
41.1479	2.28599	6
77.4494	4.30274	6
30.4598	1.69221	6
31.6799	1.75999	6
83.8323	4.65735	6
165.974	9.22076	6
40.6743	2.25969	6
275.455	15.3031	6
70.569	3.9205	6
52.7264	2.92924	6
93.5107	5.19504	6
28.2429	1.56905	6
83.8158	4.65643	6
315.215	17.512	6
90.9397	5.0522	6
144.523	8.02907	6
56.9938	3.16632	6
98.3234	5.46241	6
74.0805	4.11558	6
80.7474	4.48597	6
111.862	6.21456	6
42.8855	2.38253	6
81.233	4.51295	6
82.9996	4.61109	6
37.2501	2.06945	6
45.0301	2.50167	6
45.5032	2.52796	6
165.679	9.20439	6
52.5382	2.91879	6
33.6341	1.86856	6
404.073	22.4485	6
156.972	8.72068	6
45.4768	2.52649	6
75.764	4.20911	6
62.2453	3.45807	6
270.071	15.004	6
86.3792	4.79884	6
88.5228	4.91793	6
75.4807	4.19337	6
109.664	6.09246	6
311.134	17.2852	6
43.1231	2.39573	6
95.2762	5.29312	6
114.35	6.35278	6
269.675	14.9819	6
124.297	6.90539	6
33.4948	1.86082	6
36.7284	2.04047	6
79.5998	4.42221	6
307.772	17.0984	6
28.0758	1.55977	6
74.4733	4.13741	6
76.3024	4.23902	6
60.3184	3.35102	6
40.372	2.24289	6
139.99	7.77724	6
86.4798	4.80443	6
167.32	9.29556	6
140.083	7.78239	6
46.3309	2.57394	6
59.482	3.30455	6
130.141	7.23003	6
44.8565	2.49203	6
145.616	8.08976	6
191.192	10.6218	6
124.185	6.89918	6
46.4711	2.58173	6
52.9025	2.93903	6
214.906	11.9392	6
66.9826	3.72126	6
84.8921	4.71623	6
27.6966	1.5387	6
222.606	12.367	6
65.5936	3.64409	6
71.7409	3.98561	6
45.0578	2.50321	6
106.701	5.92785	6
240.987	13.3882	6
577.587	32.0882	6
152.446	8.46925	6
419.71	23.3172	6
70.3735	3.90964	6
124.63	6.92388	6
132.129	7.34051	6
108.398	6.02212	6
288.054	16.003	6
254.137	14.1187	6
27.0449	1.50249	6
44.0354	2.44641	6
152.779	8.48771	6
101.993	5.66628	6
78.0232	4.33462	6
408.987	22.7215	6
28.9772	1.60984	6
138.972	7.72068	6
190.215	10.5675	6
29.7616	1.65342	6
121.759	6.76441	6
435.745	24.208	6
54.9887	3.05493	6
131.902	7.32789	6
140.025	7.77916	6
45.1972	2.51096	6
49.9608	2.7756	6
40.3532	2.24185	6
74.3423	4.13013	6
115.944	6.44131	6
39.1006	0.663901	6
169.634	9.42412	6
60.8784	3.38213	6
112.754	6.2641	6
92.9743	5.16524	6
44.8242	2.49023	6
46.9391	2.60773	6
57.7566	3.2087	6
268.81	14.9339	6
66.9416	3.71898	6
