# Supplementary material for: Key steps in unconventional secretion of fibroblast growth factor 2 reconstituted with purified components
Source: eLife. 2017 Jul 19;6:e28985. doi: 10.7554/eLife.28985 (PMC5601999; doi:10.7554/eLife.28985)
Supplement: Figure 12—source data 1. — This source file provides extensive information of each individual GUV analyzed by Z-scan FCS including pore formation state, particle number, brightness of a cluster, oligomeric state, two independent determinations of surface protein concentration, diffusion times, and diffusion coefficients. Furthermore, reference measurements of monomer units (see ‘Material and methods’ for details) as well as calculations of mean values with standard deviations that are plotted in Figure 12 are given. DOI: http://dx.doi.org/10.7554/eLife.28985.019 [file elife-28985-fig12-data1.xlsx]

## Sheet: Fig. 12
Figure 12				Surface protein conc [nmol/m2] range
				0-0.4	>0.4	0-2.4
HisFGF2-Y81pCMF-WT-GFP	without memrane pores	%of GUVs in class		90	10	100
		Oligomeric State	Average	5.22252	14.1156	6.11183
			SD	2.85955	0.698091	3.83771
		Diffusion coefficient [µm2/s]	Average	2.76034	1.99927	2.68423
			SD	0.49585	0.622323	0.548699
		Surface protein concentration	Average	0.0931889	0.874006	0.171271
			SD	0.0676143	0.41924	0.270154
	with memrane pores	%of GUVs in class		43.3333	56.6667	100
		Oligomeric State	Average	5.23522	9.22533	7.49629
			SD	3.49759	2.95744	3.73255
		Diffusion coefficient [µm2/s]	Average	2.50898	1.72756	2.06618
			SD	0.804821	0.398599	0.714701
		Surface protein concentration	Average	0.234822	1.08069	0.714146
			SD	0.108017	0.599565	0.620412
HisFGF2-Y81pCMF-C77/95A-GFP	without memrane pores	%of GUVs in class		88.8889	11.1111	100
		Oligomeric State	Average	1.09085	1.82038	1.17191
			SD	0.461651	-	0.495596
		Diffusion coefficient [µm2/s]	Average	4.96884	3.83044	4.84235
			SD	1.03926	-	1.04357
		Surface protein concentration	Average	0.184668	0.664337	0.237964
			SD	0.103321	-	0.18683
	0-0.4	>0.4
	GUVs: PM+2%PIP2
	GUV	Pore Formation State	*Particle number	Brightness of a cluster	Oligomeric state	**Suface protein conc. I	Suface protein conc. II	Diffusion time	Diffusion coeficient	Diffusion coeficient
	Number			[counts/s]		[AU]	[nmol/m2]	[s]	[m2 /s]	[µm2 /s]
HisFGF2-Y81pCMF-WT-GFP	1	non-leaky	0.6156	0.0802077	3.81941	0.0493738	0.0218314	0.0047541	2.99524e-12	2.99524
without membrane pores	2	non-leaky	1.2136	0.0669482	3.18801	0.0787987	0.0359237	0.0053354	2.6689e-12	2.6689
	3	non-leaky	0.9574	0.0869343	4.13973	0.0832319	0.0368004	0.004001	3.55902e-12	3.55902
	4	non-leaky	0.912	0.0769158	3.66266	0.0701472	0.0310154	0.0044834	3.17608e-12	3.17608
	5	non-leaky	0.7734	0.0521713	2.48435	0.0403505	0.0178403	0.0036991	3.84949e-12	3.84949
	6	non-leaky	0.685	0.0844476	4.02132	0.0578422	0.0255767	0.0049705	2.86483e-12	2.86483
	7	non-leaky	0.9228	0.0522611	2.48862	0.0482244	0.0213232	0.0044155	3.22492e-12	3.22492
	8	non-leaky	0.9483	0.166754	7.94067	0.158121	0.069918	0.006135	2.32105e-12	2.32105
	9	non-leaky	1.2477	0.0998561	4.75505	0.124585	0.0550874	0.0050047	2.84526e-12	2.84526
	10	non-leaky	1.0029	0.200294	9.5378	0.200874	0.0888163	0.0053956	2.63912e-12	2.63912
	11	non-leaky	1.1743	0.130847	6.23081	0.153657	0.0679376	0.0056633	2.51437e-12	2.51437
	12	non-leaky	1.8749	0.21305	10.1452	0.399442	0.176615	0.0065821	2.16339e-12	2.16339
	13	non-leaky	1.7396	0.108313	5.15775	0.188423	0.0833099	0.005101	2.79154e-12	2.79154
	14	non-leaky	1.4644	0.1625	7.73812	0.237971	0.105216	0.0058935	2.41616e-12	2.41616
	15	non-leaky	2.0888	0.0218778	1.0418	0.0456971	0.0202054	0.0036502	3.90106e-12	3.90106
	16	non-leaky	2.4052	0.0360805	1.71812	0.0867833	0.0383699	0.0041721	3.41307e-12	3.41307
	17	non-leaky	3.3014	0.115087	5.48031	0.379919	0.167992	0.0050945	2.7951e-12	2.7951
	18	non-leaky	2.4628	0.171617	8.17225	0.422654	0.186878	0.0063963	2.22623e-12	2.22623
	19	non-leaky	1.1245	0.127822	6.08677	0.143738	0.0635525	0.0051736	2.75237e-12	2.75237
	20	non-leaky	1.4272	0.0940582	4.47896	0.134244	0.0593539	0.0056917	2.50183e-12	2.50183
	21	non-leaky	9.2171	0.0323975	2.15983	0.298599	0.184842	0.0057314	2.4845e-12	2.4845
	22	non-leaky	2.4327	0.0532299	3.54866	0.129498	0.0801566	0.005698	2.49906e-12	2.49906
	23	non-leaky	3.0098	0.0502317	3.34878	0.151189	0.093586	0.0048733	2.92197e-12	2.92197
	24	non-leaky	4.1569	0.0649192	4.32795	0.264025	0.167047	0.0060284	2.36209e-12	2.36209
	25	non-leaky	5.1399	0.0567261	3.78174	0.291566	0.180482	0.0060247	2.36354e-12	2.36354
	26	non-leaky	1.968	0.269786	12.8469	0.530949	0.234753	0.0069453	2.05026e-12	2.05026
	27	non-leaky	2.4947	0.182834	8.70638	0.456121	0.201671	0.0063894	2.22864e-12	2.22864
	28	non-leaky	3.286	0.299525	14.2631	0.984228	0.43518	0.0052619	2.70618e-12	2.70618
	29	non-leaky	7.3899	0.200333	13.3555	1.48051	0.916401	0.0092824	1.53405e-12	1.53405
	30	non-leaky	9.2901	0.220922	14.7281	2.05232	1.27044	0.0081019	1.75757e-12	1.75757
HisFGF2-Y81pCMF-WT-GFP	1	leaky	0.9844	0.152004	7.23827	0.149628	0.0661596	0.0054859	2.59568e-12	2.59568
with membrane pores	2	leaky	3.2714	0.0133688	0.636612	0.043734	0.0193373	0.0029211	4.87476e-12	4.87476
	3	leaky	1.7089	0.180231	8.58241	0.308	0.13618	0.0075659	1.88208e-12	1.88208
	4	leaky	10.1116	0.0313545	2.0903	0.317044	0.196253	0.0047087	3.02411e-12	3.02411
	5	leaky	3.639	0.193136	9.19694	0.702822	0.310751	0.0065357	2.17875e-12	2.17875
	6	leaky	1.7568	0.271164	12.9126	0.622015	0.210631	0.0083327	1.70889e-12	1.70889
	7	leaky	8.0594	0.0473319	3.15546	0.381468	0.23613	0.0062349	2.28386e-12	2.28386
	8	leaky	6.0706	0.103744	6.91628	0.629772	0.389844	0.0066501	2.14127e-12	2.14127
	9	leaky	7.2675	0.0603865	4.02577	0.438859	0.271657	0.0066553	2.1396e-12	2.1396
	10	leaky	6.3409	0.0695163	4.63442	0.440804	0.272855	0.006766	2.10459e-12	2.10459
	11	leaky	11.1202	0.0505856	3.37238	0.56253	0.348205	0.0063392	2.24628e-12	2.24628
	12	leaky	12.8272	0.0367939	2.45293	0.471955	0.292148	0.0057528	2.47526e-12	2.47526
	13	leaky	11.4586	0.0426534	2.84356	0.488763	0.302538	0.0048081	2.9616e-12	2.9616
	14	leaky	6.3613	0.151995	7.23786	0.966919	0.427507	0.0056503	2.52016e-12	2.52016
	15	leaky	8.4004	0.15902	7.57239	1.33584	0.590635	0.0075764	1.87947e-12	1.87947
	16	leaky	6.0875	0.166511	7.9291	1.01366	0.448177	0.0061203	2.32663e-12	2.32663
	17	leaky	7.2075	0.214452	10.212	1.5575	0.683411	0.009216	1.5451e-12	1.5451
	18	leaky	6.7298	0.213281	10.1562	1.43532	0.634632	0.0109951	1.29509e-12	1.29509
	19	leaky	6.7062	0.221561	10.5505	1.44125	0.656957	0.0055986	2.54343e-12	2.54343
	20	leaky	12.7995	0.0864113	5.76075	1.10601	0.684635	0.0084463	1.6859e-12	1.6859
	21	leaky	16.496	0.0937817	6.25211	1.54706	0.957617	0.0082129	1.73381e-12	1.73381
	22	leaky	12.5819	0.160601	7.64769	2.02058	0.893435	0.0126683	1.12404e-12	1.12404
	23	leaky	14.2636	0.263863	17.5909	3.7635	2.32972	0.0093852	1.51725e-12	1.51725
	24	leaky	11.5433	0.162182	10.8121	2.86577	1.15885	0.0092122	1.54574e-12	1.54574
	25	leaky	12.4182	0.141729	9.44863	1.76007	1.08947	0.0097939	1.45393e-12	1.45393
	26	leaky	12.8936	0.131569	8.77129	1.69647	1.05008	0.0077237	1.84363e-12	1.84363
	27	leaky	15.5754	0.10885	7.25666	1.69541	1.04945	0.0090231	1.57813e-12	1.57813
	28	leaky	12.0306	0.206344	13.7563	2.48244	1.53665	0.0092615	1.53751e-12	1.53751
	29	leaky	38.8498	0.0973943	6.49295	3.78377	2.34217	0.008152	1.74677e-12	1.74677
	30	leaky	21.0999	0.140748	9.38317	2.96973	1.8383	0.0095441	1.49198e-12	1.49198
HisFGF2-Y81pCMF-77/95-GFP	1	non-leaky	9.2015	0.0181703	0.86525	0.167194	0.0739242	0.0027088	5.25681e-12	5.25681
without membrane pores	2	non-leaky	8.9349	0.0191738	0.913038	0.17131	0.0757469	0.0025152	5.66144e-12	5.66144
	3	non-leaky	7.1138	0.0226925	1.08059	0.16143	0.0713757	0.0024402	5.83544e-12	5.83544
	4	non-leaky	49.145	0.00799248	0.380594	0.392786	0.173671	0.0049359	2.88491e-12	2.88491
	5	non-leaky	22.1478	0.0245638	1.16971	0.544036	0.240544	0.0023187	6.14122e-12	6.14122
	6	non-leaky	22.4219	0.0348421	1.65915	0.781221	0.345417	0.0029284	4.8626e-12	4.8626
	7	non-leaky	13.7697	0.0380064	1.80983	0.523356	0.231392	0.0029364	4.84936e-12	4.84936
	8	non-leaky	33.6646	0.0178218	0.848656	0.599938	0.265272	0.0033435	4.25891e-12	4.25891
	9	non-leaky	39.3044	0.0382279	1.82038	1.4578	0.664337	0.0037175	3.83044e-12	3.83044
* number of diffusing species in the focal plane
** determined by fluorescence intensity measurements
			Brightness of monomer unit
			GUVs: PM+2%Ni
				Particle number	Diffusion time	Brightness	Avarage of Brightness
					[s]	[counts/s]	[counts/s]
			1	3.1384	1.1134	0.0217777	0.0209524
			2	5.0008	1.2766	0.0203305
			3	3.6335	1.136	0.0218028
			4	5.927	1.2107	0.0208511
			5	3.63	1.2	0.02
			after change of microscope setting
				Particle number	Diffusion time	Brightness	Avarage of Brightness
					[s]	[counts/s]	[counts/s]
			1	23.4653	1.7955	0.0128175	0.015076
			2	29.4108	2.3917	0.0172631
			3	23.5521	1.9549	0.0139666
			4	35.4424	2.5351	0.0162364
			5	14.4783	2.5202	0.0149457
			6	21.4756	2.2904	0.0152269
