# Supplementary material for: Key steps in unconventional secretion of fibroblast growth factor 2 reconstituted with purified components
Source: eLife journal article supplement (doi:10.7554/elife.28985), 2017-07-19
Supplement: supp [file elife_poa_e28985_Steringer_Source_Data_File.xlsx]

## Sheet: Fig.1-HSQC
I(1,4,5)P3 titration										heparin disaccharide titration										I(1,4,5)P3 titration with pre-bound heparin disaccharide										heparin disaccharide titration with pre-bound I(1,4,5)P3
	start point of titration [80 µM FGF2-C77/95S]				end point of titration [80 µM FGF2-C77/95S + 900 µM IP3]						start point of titration [80 µM FGF2-C77/95S]				end point of titration [80 µM FGF2-C77/95S + 900 µM heparin]						start point of titration [80 µM FGF2-C77/95S + 900 µM heparin]				end point of titration [80 µM FGF2-C77/95S + 900 µM heparin + 450 µM IP3*]						start point of titration [80 µM FGF2-C77/95S + 900 µM IP3]				end point of titration [80 µM FGF2-C77/95S + 900 µM IP3 + 900 µM heparin]
Residue	d 1H	d 15N	Line Width [ppm]		d 1H	d 15N	Line Width [ppm]	Dd [ppm]		Residue	d 1H	d 15N	Line Width [ppm]		d 1H	d 15N	Line Width [ppm]	Dd [ppm]		Residue	d 1H	d 15N	Line Width [ppm]		d 1H	d 15N	Line Width [ppm]	Dd [ppm]		Residue	d 1H	d 15N	Line Width [ppm]		d 1H	d 15N	Line Width [ppm]	Dd [ppm]
8LeuH	8.46258	129.072	0.036609		8.46079	129.079	0.03516	0.00206619		8LeuH	8.46258	129.072	0.036609		8.46971	129.086	0.03696	0.00742149		8LeuH	8.46971	129.086	0.03696		8.47363	129.1	0.0348802	0.00444848		8LeuH	8.46079	129.079	0.03516		8.4635	129.12	0.0345119	0.00671512
10AlaH	8.47167	126.861	0.0483538		8.46997	126.874	0.0491758	0.00255212		10AlaH	8.47167	126.861	0.0483538		8.47529	126.839	0.0503118	0.00487423		10AlaH	8.47529	126.839	0.0503118		8.48058	126.872	0.0341266	0.00721919		10AlaH	8.46997	126.874	0.0491758		8.4742	126.951	0.0462844	0.0123495
14AspH	8.49901	123.648	0.0358028		8.4959	123.642	0.0377222	0.0032615		14AspH	8.49901	123.648	0.0358028		8.50233	123.673	0.0351491	0.00500399		14AspH	8.50233	123.673	0.0351491		8.51099	123.706	0.0351579	0.0099445		14AspH	8.4959	123.642	0.0377222		8.49854	123.664	0.0441021	0.00429198
15GlyH	8.57145	112.189	0.0542219		n.d.	n.d.	n.d.	n.d		15GlyH	8.57145	112.189	0.0542219		8.57896	112.055	0.0655809	0.0214586		15GlyH	8.57896	112.055	0.0655809		n.d.	n.d.	n.d	n.d		15GlyH	n.d.	n.d.	n.d.		n.d.	n.d.	n.d.	n.d
17SerH	8.53749	116.167	0.0702554		n.d.	n.d.	n.d.	n.d		17SerH	8.53749	116.167	0.0702554		n.d.	n.d.	n.d.	n.d		17SerH	n.d.	n.d.	n.d.		n.d.	n.d.	n.d	n.d		17SerH	n.d.	n.d.	n.d.		n.d.	n.d.	n.d.	n.d
18GlyH	8.67106	113.558	0.0553862		n.d.	n.d.	n.d.	n.d		18GlyH	8.67106	113.558	0.0553862		n.d.	n.d.	n.d.	n.d		18GlyH	n.d.	n.d.	n.d.		n.d.	n.d.	n.d	n.d		18GlyH	n.d.	n.d.	n.d.		n.d.	n.d.	n.d.	n.d
19AlaH	8.13365	125.847	0.0410623		8.13587	125.84	0.0394168	0.00243689		19AlaH	8.13365	125.847	0.0410623		8.14522	125.869	0.0423259	0.0120306		19AlaH	8.14522	125.869	0.0423259		8.15086	125.931	0.0355684	0.010833		19AlaH	8.13587	125.84	0.0394168		8.13639	125.891	0.0405201	0.00760181
26LysH	8.21893	123.47	0.0509342		n.d.	n.d.	n.d.	n.d		26LysH	8.21893	123.47	0.0509342		n.d.	n.d.	n.d.	n.d		26LysH	n.d.	n.d.	n.d.		n.d.	n.d.	n.d	n.d		26LysH	n.d.	n.d.	n.d.		n.d.	n.d.	n.d.	n.d
29LysH	9.60397	122.378	0.0418425		9.58814	122.327	0.0455131	0.0175562		29LysH	9.60397	122.378	0.0418425		9.6039	122.414	0.0490426	0.00539295		29LysH	9.6039	122.414	0.0490426		9.61068	122.516	0.0379062	0.0168131		29LysH	9.58814	122.327	0.0455131		9.57741	122.425	0.0397994	0.0181753
30ArgH	9.06977	120.005	0.0433485		9.06439	119.945	0.0433307	0.0104983		30ArgH	9.06977	120.005	0.0433485		9.07805	120.055	0.0436062	0.0111336		30ArgH	9.07805	120.055	0.0436062		9.08372	119.968	0.042922	0.0142107		30ArgH	9.06439	119.945	0.0433307		9.06355	120.06	0.0386558	0.017245
31LeuH	10.56	127.774	0.0403748		10.5812	127.817	0.0387306	0.0222078		31LeuH	10.56	127.774	0.0403748		10.5767	127.887	0.0384999	0.0238167		31LeuH	10.5767	127.887	0.0384999		10.5963	127.917	0.0459644	0.0200784		31LeuH	10.5812	127.817	0.0387306		10.5997	127.922	0.0826686	0.0242635
32TyrH	8.88479	129.576	0.0405394		n.d.	n.d.	n.d.	n.d		32TyrH	8.88479	129.576	0.0405394		8.88015	129.616	0.0402807	0.00760739		32TyrH	8.88015	129.616	0.0402807		n.d.	n.d.	n.d	n.d		32TyrH	n.d.	n.d.	n.d.		n.d.	n.d.	n.d.	n.d
33CysH	9.58493	132.966	0.0396798		9.63048	133.174	0.039887	0.0552457		33CysH	9.58493	132.966	0.0396798		9.59036	133.057	0.0384883	0.0147685		33CysH	9.59036	133.057	0.0384883		9.63234	133.259	0.0401622	0.0517236		33CysH	9.63048	133.174	0.039887		9.62758	133.143	0.0425128	0.00550057
34LysH	8.61917	131.515	0.0387569		8.61867	131.51	0.0390295	0.000819665		34LysH	8.61917	131.515	0.0387569		8.62973	131.554	0.03809	0.0121116		34LysH	8.62973	131.554	0.03809		8.63692	131.564	0.0371556	0.00733753		34LysH	8.61867	131.51	0.0390295		8.60745	131.509	0.0438072	0.0112227
35AsnH	7.93622	120.705	0.0428704		7.94875	121.821	0.0404852	0.167952		35AsnH	7.93622	120.705	0.0428704		7.93415	120.586	0.0463309	0.0179741		35AsnH	7.93415	120.586	0.0463309		7.95737	121.495	0.0391711	0.138391		35AsnH	7.94875	121.821	0.0404852		7.94984	121.846	0.0395199	0.00390088
36GlyH	7.91915	111.266	0.0399889		7.87118	110.57	0.0372785	0.11484		36GlyH	7.91915	111.266	0.0399889		7.94426	111.461	0.0358948	0.0385348		36GlyH	7.94426	111.461	0.0358948		7.89573	110.79	0.0342198	0.111788		36GlyH	7.87118	110.57	0.0372785		7.88466	110.723	0.0400497	0.0265527
37GlyH	7.2953	111.067	0.0378219		7.30539	111.298	0.0389326	0.036059		37GlyH	7.2953	111.067	0.0378219		7.29227	111.006	0.041391	0.00966		37GlyH	7.29227	111.006	0.041391		7.31235	111.132	0.0399485	0.027512		37GlyH	7.30539	111.298	0.0389326		7.30131	111.287	0.0387844	0.0043816
38PheH	6.09931	115.888	0.037684		6.07108	115.847	0.0364464	0.0289008		38PheH	6.09931	115.888	0.037684		6.1007	115.877	0.037574	0.0021701		38PheH	6.1007	115.877	0.037574		6.08904	115.845	0.035558	0.0126139		38PheH	6.07108	115.847	0.0364464		6.07908	115.864	0.03855	0.00838977
39PheH	9.5982	123.509	0.0417753		9.594	123.516	0.0542872	0.00433109		39PheH	9.5982	123.509	0.0417753		9.59058	123.37	0.0403894	0.0221509		39PheH	9.59058	123.37	0.0403894		9.60312	123.426	0.0359009	0.0150485		39PheH	9.594	123.516	0.0542872		9.59867	123.474	0.0659396	0.00780361
40LeuH	8.47947	125.847	0.0420348		8.47866	125.828	0.0370544	0.00297009		40LeuH	8.47947	125.847	0.0420348		8.48528	125.846	0.0371477	0.0058126		40LeuH	8.48528	125.846	0.0371477		8.49254	125.875	0.034669	0.00845499		40LeuH	8.47866	125.828	0.0370544		8.48238	125.865	0.0380899	0.00674882
41ArgH	9.8561	131.66	0.0391454		9.89108	131.589	0.0361211	0.0365449		41ArgH	9.8561	131.66	0.0391454		9.86543	131.631	0.0386932	0.0102961		41ArgH	9.86543	131.631	0.0386932		9.90038	131.686	0.0438284	0.0359009		41ArgH	9.89108	131.589	0.0361211		9.89111	131.668	0.0381526	0.0117075
46GlyH	8.25569	110.329	0.0406413		8.25482	110.366	0.0384266	0.00551407		46GlyH	8.25569	110.329	0.0406413		8.25303	110.338	0.0396007	0.00293758		46GlyH	8.25303	110.338	0.0396007		8.26595	110.288	0.040486	0.014877		46GlyH	8.25482	110.366	0.0384266		8.24799	110.371	0.0361967	0.00687057
49AspH	9.31533	131.84	0.0357107		9.30052	131.654	0.0362126	0.0316123		49AspH	9.31533	131.84	0.0357107		9.32457	131.786	0.0339985	0.0123631		49AspH	9.32457	131.786	0.0339985		9.32346	131.78	0.0391128	0.00141496		49AspH	9.30052	131.654	0.0362126		9.30427	131.625	0.0448957	0.00577057
50GlyH	8.37772	106.394	0.0398676		8.27397	106.653	0.039658	0.11078		50GlyH	8.37772	106.394	0.0398676		8.3839	106.402	0.0404442	0.00629715		50GlyH	8.3839	106.402	0.0404442		8.31446	106.536	0.0426632	0.072281		50GlyH	8.27397	106.653	0.039658		8.28754	106.756	0.0360165	0.0205881
51ValH	9.10137	118.199	0.0386408		9.10359	118.275	0.0393156	0.0116951		51ValH	9.10137	118.199	0.0386408		9.11017	118.208	0.0387528	0.00891391		51ValH	9.11017	118.208	0.0387528		9.11112	118.221	0.0412788	0.00215428		51ValH	9.10359	118.275	0.0393156		9.1067	118.318	0.0383156	0.00710393
52ArgH	9.49336	127.45	0.0483653		9.52873	127.599	0.0388767	0.0417893		52ArgH	9.49336	127.45	0.0483653		9.50701	127.558	0.0474323	0.0211279		52ArgH	9.50701	127.558	0.0474323		n.d.	n.d.	n.d	n.d		52ArgH	9.52873	127.599	0.0388767		9.53439	127.738	0.0493271	0.0217045
53GluH	7.32549	122.14	0.0376895		7.31222	122.083	0.0353316	0.0157656		53GluH	7.32549	122.14	0.0376895		7.31215	122.206	0.0373591	0.0166176		53GluH	7.31215	122.206	0.0373591		7.31884	122.157	0.0383178	0.00996206		53GluH	7.31222	122.083	0.0353316		7.32481	122.099	0.0358062	0.0128139
54LysH	8.64593	127.519	0.0421295		8.65801	127.604	0.0396987	0.0175127		54LysH	8.64593	127.519	0.0421295		8.65596	127.606	0.0380341	0.0164484		54LysH	8.65596	127.606	0.0380341		8.67095	127.687	0.0359636	0.0192429		54LysH	8.65801	127.604	0.0396987		8.66933	127.588	0.0516235	0.0115664
55SerH	8.35385	114.923	0.0367408		8.36563	114.876	0.0406376	0.0137146		55SerH	8.35385	114.923	0.0367408		8.37378	114.899	0.0436713	0.0202318		55SerH	8.37378	114.899	0.0436713		8.38231	114.856	0.0407498	0.0107059		55SerH	8.36563	114.876	0.0406376		8.34294	114.792	0.0468151	0.0259523
56AspH	7.25928	128.64	0.0369084		7.2666	128.671	0.0359908	0.00865683		56AspH	7.25928	128.64	0.0369084		7.27215	128.672	0.0373048	0.013746		56AspH	7.27215	128.672	0.0373048		7.27792	128.668	0.0377342	0.00579356		56AspH	7.2666	128.671	0.0359908		7.26842	128.753	0.0373112	0.0124799
58HisH	9.6467	121.601	0.0586952		9.66036	121.739	0.0472654	0.0248736		58HisH	9.6467	121.601	0.0586952		9.67263	121.694	0.0546629	0.0294728		58HisH	9.67263	121.694	0.0546629		9.66932	121.635	0.0474303	0.0094656		58HisH	9.66036	121.739	0.0472654		9.65747	121.653	0.0390711	0.0132681
59IleH	6.98667	110.285	0.0482814		6.98167	110.325	0.0435002	0.00779413		59IleH	6.98667	110.285	0.0482814		6.99682	110.302	0.0413757	0.010451		59IleH	6.99682	110.302	0.0413757		7.00267	110.196	0.0427147	0.0169505		59IleH	6.98167	110.325	0.0435002		6.99849	110.326	0.0494621	0.0168206
60LysH	6.80757	122.839	0.0390186		6.81043	122.837	0.0413644	0.00287461		60LysH	6.80757	122.839	0.0390186		6.81455	122.838	0.0399763	0.00698277		60LysH	6.81455	122.838	0.0399763		6.8192	122.862	0.042917	0.00590649		60LysH	6.81043	122.837	0.0413644		6.81898	122.911	0.0381209	0.0139993
61LeuH	9.94438	132.32	0.0402134		9.94313	132.257	0.0372611	0.00960965		61LeuH	9.94438	132.32	0.0402134		9.95613	132.302	0.0445619	0.0120522		61LeuH	9.95613	132.302	0.0445619		9.96251	132.406	0.0471566	0.0168653		61LeuH	9.94313	132.257	0.0372611		9.9473	132.26	0.039322	0.00419155
62GlnH	9.64686	123.019	0.0411158		9.64022	122.887	0.030378	0.0208297		62GlnH	9.64686	123.019	0.0411158		9.65403	123.014	0.0365109	0.00721214		62GlnH	9.65403	123.014	0.0365109		9.65805	122.991	0.0413827	0.0052547		62GlnH	9.64022	122.887	0.030378		9.63683	122.997	0.0377393	0.0167506
63LeuH	9.32512	134.972	0.0403683		9.33077	134.868	0.0416695	0.016634		63LeuH	9.32512	134.972	0.0403683		9.33315	134.932	0.0417744	0.0100294		63LeuH	9.33315	134.932	0.0417744		9.34171	134.991	0.0440738	0.0122705		63LeuH	9.33077	134.868	0.0416695		9.33607	134.959	0.0399383	0.0146163
65AlaH	8.70638	131.393	0.0384106		n.d.	n.d.	n.d.	n.d		65AlaH	8.70638	131.393	0.0384106		8.71999	131.351	0.0394167	0.0149936		65AlaH	8.71999	131.351	0.0394167		n.d.	n.d.	n.d	n.d		65AlaH	n.d.	n.d.	n.d.		n.d.	n.d.	n.d.	n.d
66GluH	8.68567	129.677	0.0418176		8.69152	129.69	0.0420441	0.00612955		66GluH	8.68567	129.677	0.0418176		8.69326	129.808	0.0482465	0.0209488		66GluH	8.69326	129.808	0.0482465		8.70343	129.851	0.0393526	0.0120333		66GluH	8.69152	129.69	0.0420441		8.68642	129.8	0.0442631	0.0173648
67GluH	8.76746	122.183	0.0366755		8.77671	122.227	0.0354824	0.0114052		67GluH	8.76746	122.183	0.0366755		8.77624	122.161	0.035636	0.0093361		67GluH	8.77624	122.161	0.035636		8.78756	122.235	0.0384591	0.0157797		67GluH	8.77671	122.227	0.0354824		8.79991	122.395	0.0334545	0.0342642
70ValH	8.5503	124.636	0.0439136		8.56024	124.692	0.0370238	0.0129975		70ValH	8.5503	124.636	0.0439136		8.56126	124.658	0.0412508	0.0114327		70ValH	8.56126	124.658	0.0412508		8.57347	124.721	0.0398295	0.0154609		70ValH	8.56024	124.692	0.0370238		8.56153	124.818	0.0379718	0.0188512
71ValH	9.9468	122.411	0.0412229		9.93726	122.333	0.0571264	0.0151861		71ValH	9.9468	122.411	0.0412229		9.94993	122.519	0.0361148	0.0165084		71ValH	9.94993	122.519	0.0361148		9.95057	122.482	0.0400031	0.00559274		71ValH	9.93726	122.333	0.0571264		9.9374	122.45	0.0462572	0.0175416
73IleH	10.7043	125.457	0.0401061		10.6976	125.436	0.0401163	0.00740814		73IleH	10.7043	125.457	0.0401061		10.7167	125.482	0.0385759	0.0128855		73IleH	10.7167	125.482	0.0385759		10.7191	125.508	0.0457494	0.00460908		73IleH	10.6976	125.436	0.0401163		10.7058	125.68	0.0356286	0.0374671
74LysH	8.99956	130.348	0.0431568		9.01101	130.226	0.0393622	0.0216683		74LysH	8.99956	130.348	0.0431568		9.00709	130.328	0.0496964	0.0081314		74LysH	9.00709	130.328	0.0496964		9.02441	130.325	0.0473725	0.0173262		74LysH	9.01101	130.226	0.0393622		9.01234	130.329	0.0453266	0.0155206
75GlyH	9.41626	116.885	0.0394011		9.41374	116.866	0.0380005	0.00381445		75GlyH	9.41626	116.885	0.0394011		9.42315	116.895	0.0379044	0.00707447		75GlyH	9.42315	116.895	0.0379044		9.42985	116.83	0.0454014	0.0119144		75GlyH	9.41374	116.866	0.0380005		9.41418	116.929	0.0370322	0.00946024
76ValH	8.13658	130.928	0.0386819		8.12991	130.901	0.0375305	0.00781969		76ValH	8.13658	130.928	0.0386819		8.14733	130.926	0.0416618	0.0107573		76ValH	8.14733	130.926	0.0416618		8.14814	130.968	0.0433653	0.00636525		76ValH	8.12991	130.901	0.0375305		8.13267	130.992	0.0416688	0.0139748
77SerH	9.6539	118.933	0.0389153		9.65212	118.947	0.0368554	0.00284432		77SerH	9.6539	118.933	0.0389153		9.65962	118.962	0.0415729	0.00726497		77SerH	9.65962	118.962	0.0415729		9.67226	118.952	0.042205	0.012744		77SerH	9.65212	118.947	0.0368554		9.65307	118.899	0.0472487	0.00733082
80ArgH	6.90146	115.052	0.0582039		6.89937	115.07	0.0408749	0.00345009		80ArgH	6.90146	115.052	0.0582039		6.90496	115.07	0.0380119	0.00443695		80ArgH	6.90496	115.07	0.0380119		6.91081	115.063	0.0525246	0.0059609		80ArgH	6.89937	115.07	0.0408749		6.89972	115.155	0.0381635	0.0126333
81TyrH	9.71992	123.203	0.0386745		9.73075	123.211	0.0387226	0.0108837		81TyrH	9.71992	123.203	0.0386745		9.73282	123.232	0.0370301	0.0135744		81TyrH	9.73282	123.232	0.0370301		9.74295	123.246	0.0430435	0.0103675		81TyrH	9.73075	123.211	0.0387226		9.74518	123.259	0.0368771	0.0161805
82LeuH	9.32579	126.963	0.0390995		9.32852	127.152	0.0380102	0.0284573		82LeuH	9.32579	126.963	0.0390995		9.33315	127.018	0.0363437	0.0109677		82LeuH	9.33315	127.018	0.0363437		9.34297	127.081	0.0379571	0.0136733		82LeuH	9.32852	127.152	0.0380102		9.33231	127.113	0.0359226	0.00701074
83AlaH	9.27382	130.257	0.0363701		9.26523	130.231	0.034585	0.00946576		83AlaH	9.27382	130.257	0.0363701		9.28758	130.313	0.0360111	0.0160777		83AlaH	9.28758	130.313	0.0360111		9.2878	130.218	0.0337294	0.0142712		83AlaH	9.26523	130.231	0.034585		9.2951	130.283	0.0558233	0.0308671
84MetH	7.89171	122.021	0.0370556		7.89005	122.011	0.0363665	0.00224135		84MetH	7.89171	122.021	0.0370556		7.8865	121.98	0.0406438	0.00798149		84MetH	7.8865	121.98	0.0406438		7.89855	122.017	0.0385493	0.0132554		84MetH	7.89005	122.011	0.0363665		7.88622	122.04	0.0358577	0.00588071
85LysH	8.67219	124.646	0.0419582		8.65403	124.775	0.0432167	0.0266202		85LysH	8.67219	124.646	0.0419582		8.68545	124.795	0.0382437	0.026105		85LysH	8.68545	124.795	0.0382437		8.67428	124.785	0.0377124	0.0112834		85LysH	8.65403	124.775	0.0432167		8.65812	124.85	0.0507353	0.0119042
86GluH	8.08141	119.267	0.0400279		8.06915	119.184	0.0787419	0.0175513		86GluH	8.08141	119.267	0.0400279		8.08793	119.182	0.0372952	0.0143564		86GluH	8.08793	119.182	0.0372952		8.08441	119.235	0.040958	0.00862589		86GluH	8.06915	119.184	0.0787419		8.07051	119.246	0.0529001	0.00944493
88GlyH	8.78839	111.753	0.042212		8.77519	111.905	0.0382973	0.0263506		88GlyH	8.78839	111.753	0.042212		8.79638	111.779	0.0396583	0.00885902		88GlyH	8.79638	111.779	0.0396583		8.79286	111.815	0.0440222	0.00650387		88GlyH	8.77519	111.905	0.0382973		8.78035	111.909	0.0363108	0.00519322
89ArgH	7.68782	121.563	0.0390156		7.65737	121.358	0.036921	0.0432563		89ArgH	7.68782	121.563	0.0390156		7.68644	121.467	0.0372752	0.0144719		89ArgH	7.68644	121.467	0.0372752		7.67529	121.397	0.0380986	0.0152583		89ArgH	7.65737	121.358	0.036921		7.66272	121.454	0.0374167	0.0153617
92AlaH	8.98458	125.702	0.0446205		8.9795	125.679	0.0373607	0.0061492		92AlaH	8.98458	125.702	0.0446205		8.99925	125.743	0.044381	0.015918		92AlaH	8.99925	125.743	0.044381		8.99941	125.742	0.0390441	0.000278539		92AlaH	8.9795	125.679	0.0373607		8.98121	125.694	0.0411664	0.00282248
93SerH	10.0079	124.35	0.035788		9.99642	124.261	0.0615069	0.0175694		93SerH	10.0079	124.35	0.035788		10.0082	124.404	0.0374554	0.00809001		93SerH	10.0082	124.404	0.0374554		10.0172	124.365	0.0382213	0.0106694		93SerH	9.99642	124.261	0.0615069		9.9962	124.408	0.0669095	0.0220001
95SerH	7.89352	113.397	0.0419387		7.92806	113.504	0.0356818	0.0380397		95SerH	7.89352	113.397	0.0419387		7.91303	113.461	0.0440348	0.0216952		95SerH	7.91303	113.461	0.0440348		7.92838	113.428	0.0379008	0.016116		95SerH	7.92806	113.504	0.0356818		7.95446	113.821	0.0532508	0.0543793
96ValH	8.5985	126.17	0.0380736		8.5882	125.893	0.0310496	0.0428324		96ValH	8.5985	126.17	0.0380736		8.59708	126.131	0.036489	0.00605049		96ValH	8.59708	126.131	0.036489		8.5985	125.898	0.0340006	0.0349983		96ValH	8.5882	125.893	0.0310496		8.582	125.806	0.0396847	0.0144479
97ThrH	7.50638	122.476	0.038613		7.50958	122.491	0.0377777	0.00390925		97ThrH	7.50638	122.476	0.038613		7.51822	122.523	0.0390631	0.0137754		97ThrH	7.51822	122.523	0.0390631		7.5227	122.502	0.042329	0.00543888		97ThrH	7.50958	122.491	0.0377777		7.51504	122.527	0.0354131	0.0076656
98AspH	9.01254	120.407	0.0419918		9.0025	120.399	0.0461482	0.0101088		98AspH	9.01254	120.407	0.0419918		9.01563	120.377	0.0502221	0.00543159		98AspH	9.01563	120.377	0.0502221		9.01595	120.422	0.0440698	0.00664821		98AspH	9.0025	120.399	0.0461482		9.00466	120.376	0.056129	0.00412648
99GluH	7.97257	122.132	0.0416838		7.97829	122.211	0.0321853	0.0131164		99GluH	7.97257	122.132	0.0416838		7.98047	122.142	0.0350664	0.00804339		99GluH	7.98047	122.142	0.0350664		7.99146	122.168	0.03271	0.011661		99GluH	7.97829	122.211	0.0321853		7.97989	122.259	0.0330334	0.00743715
100CysH	7.93483	118.529	0.0385701		7.91338	118.533	0.0374187	0.0214575		100CysH	7.93483	118.529	0.0385701		7.92846	118.619	0.0498933	0.0149084		100CysH	7.92846	118.619	0.0498933		7.92567	118.521	0.0353284	0.0149388		100CysH	7.91338	118.533	0.0374187		7.91617	118.567	0.0359394	0.00582248
101PheH	6.66796	118.14	0.0380833		6.64795	118.092	0.0565935	0.0212573		101PheH	6.66796	118.14	0.0380833		6.67248	118.136	0.0375923	0.00454654		101PheH	6.67248	118.136	0.0375923		6.66218	118.113	0.0870434	0.0108754		101PheH	6.64795	118.092	0.0565935		6.65006	118.144	0.0583645	0.00807311
102PheH	9.63263	124.016	0.0537554		9.61901	123.981	0.0384468	0.014593		102PheH	9.63263	124.016	0.0537554		9.63546	124.047	0.0415036	0.0054961		102PheH	9.63546	124.047	0.0415036		9.6409	124.061	0.0449945	0.0058115		102PheH	9.61901	123.981	0.0384468		9.62065	124.023	0.0412119	0.0064969
103PheH	10.4806	125.053	0.039885		10.4509	125.055	0.0384898	0.0296516		103PheH	10.4806	125.053	0.039885		10.4856	125.023	0.0403974	0.00681196		103PheH	10.4856	125.023	0.0403974		10.4763	125.03	0.0430561	0.00943892		103PheH	10.4509	125.055	0.0384898		10.4618	125.058	0.0401229	0.0108499
104GluH	8.89796	132.008	0.040185		8.89436	131.996	0.0391936	0.0039913		104GluH	8.89796	132.008	0.040185		8.91204	131.995	0.0377106	0.0142125		104GluH	8.91204	131.995	0.0377106		8.91613	132.087	0.0437768	0.0144537		104GluH	8.89436	131.996	0.0391936		8.90096	132.012	0.0512333	0.00700656
105ArgH	8.74208	132.633	0.0388709		8.76877	132.718	0.038525	0.0295972		105ArgH	8.74208	132.633	0.0388709		8.76211	132.674	0.0371234	0.0209907		105ArgH	8.76211	132.674	0.0371234		8.78003	132.772	0.0395786	0.0230925		105ArgH	8.76877	132.718	0.038525		8.76863	132.773	0.0381386	0.00831868
106LeuH	8.54734	130.114	0.0380329		8.53634	130.094	0.0371158	0.0113884		106LeuH	8.54734	130.114	0.0380329		8.54884	130.102	0.0379893	0.00230071		106LeuH	8.54884	130.102	0.0379893		8.55092	130.182	0.0404677	0.0121257		106LeuH	8.53634	130.094	0.0371158		8.53542	130.133	0.0380836	0.00583153
107GluH	9.62301	131.313	0.0422162		9.60625	131.221	0.045283	0.0216675		107GluH	9.62301	131.313	0.0422162		9.61974	131.212	0.0416009	0.0155209		107GluH	9.61974	131.212	0.0416009		9.62822	131.307	0.0467255	0.016621		107GluH	9.60625	131.221	0.045283		9.61222	131.247	0.0441691	0.00714578
108SerH	8.57652	115.998	0.0556947		n.d.	n.d.	n.d.	n.d		108SerH	8.57652	115.998	0.0556947		8.50582	115.047	0.0398432	0.159174		108SerH	8.50582	115.047	0.0398432		n.d.	n.d.	n.d	n.d		108SerH	n.d.	n.d.	n.d.		n.d.	n.d.	n.d.	n.d
110AsnH	8.62889	111.369	0.0469283		8.61151	111.431	0.0447257	0.0197608		110AsnH	8.62889	111.369	0.0469283		8.6245	111.471	0.0432119	0.0159246		110AsnH	8.6245	111.471	0.0432119		8.62761	111.384	0.0486602	0.0133265		110AsnH	8.61151	111.431	0.0447257		8.60513	111.581	0.0408912	0.023325
111TyrH	8.0127	120.871	0.0490703		8.02197	120.984	0.0379174	0.0192851		111TyrH	8.0127	120.871	0.0490703		8.01167	120.864	0.0546334	0.00151097		111TyrH	8.01167	120.864	0.0546334		8.04072	121.012	0.0427306	0.0365278		111TyrH	8.02197	120.984	0.0379174		8.02856	120.996	0.0484852	0.00684219
113ThrH	8.94978	109.965	0.0406153		8.9432	109.825	0.0388658	0.0219838		113ThrH	8.94978	109.965	0.0406153		8.95511	109.987	0.0380125	0.00623439		113ThrH	8.95511	109.987	0.0380125		8.9572	109.833	0.0435294	0.0231944		113ThrH	8.9432	109.825	0.0388658		8.94319	109.86	0.0375186	0.00523651
114TyrH	10.8477	122.808	0.0416426		10.898	122.895	0.0379941	0.0519601		114TyrH	10.8477	122.808	0.0416426		10.8712	122.88	0.0383311	0.0257912		114TyrH	10.8712	122.88	0.0383311		10.9054	122.857	0.049356	0.0344583		114TyrH	10.898	122.895	0.0379941		10.8972	122.858	0.0389238	0.00568012
115ArgH	8.96745	129.584	0.0425632		8.9766	129.218	0.0382086	0.055644		115ArgH	8.96745	129.584	0.0425632		8.98488	129.546	0.0387526	0.0183397		115ArgH	8.98488	129.546	0.0387526		8.99212	129.474	0.0372275	0.0130471		115ArgH	8.9766	129.218	0.0382086		8.98408	129.277	0.0717387	0.0115259
116SerH	9.04956	123.712	0.0364777		9.01349	123.484	0.0383622	0.0496348		116SerH	9.04956	123.712	0.0364777		9.04973	123.695	0.0363574	0.00254518		116SerH	9.04973	123.695	0.0363574		9.0401	123.581	0.0399887	0.0196199		116SerH	9.01349	123.484	0.0383622		9.01539	123.497	0.0439315	0.00272904
118LysH	7.77035	121.624	0.0393995		7.76757	121.627	0.0382447	0.00281912		118LysH	7.77035	121.624	0.0393995		7.77966	121.628	0.0375964	0.00933336		118LysH	7.77966	121.628	0.0375964		7.78248	121.643	0.0391557	0.00357695		118LysH	7.76757	121.627	0.0382447		7.77494	121.696	0.0381072	0.0127279
119TyrH	8.21832	126.026	0.0426		8.22258	125.971	0.0418722	0.0093463		119TyrH	8.21832	126.026	0.0426		8.23299	126.045	0.0457808	0.0149526		119TyrH	8.23299	126.045	0.0457808		8.23679	126.017	0.0409441	0.00570296		119TyrH	8.22258	125.971	0.0418722		8.22479	126.007	0.0399903	0.00584445
120ThrH	6.84529	106.817	0.0396513		6.87795	106.937	0.0385596	0.0372997		120ThrH	6.84529	106.817	0.0396513		6.8318	106.678	0.0356692	0.024797		120ThrH	6.8318	106.678	0.0356692		6.88163	106.838	0.0392821	0.0552864		120ThrH	6.87795	106.937	0.0385596		6.88509	107.019	0.0401642	0.0142585
124ValH	8.90057	125.031	0.0464752		8.9319	125.149	0.044978	0.0360004		124ValH	8.90057	125.031	0.0464752		8.91025	125.03	0.0487778	0.00968003		124ValH	8.91025	125.03	0.0487778		8.94183	125.118	0.0373911	0.0341885		124ValH	8.9319	125.149	0.044978		8.93181	125.201	0.0442522	0.00780502
125AlaH	9.01717	131.924	0.0519146		9.02215	132.266	0.0402679	0.0514844		125AlaH	9.01717	131.924	0.0519146		9.03594	132.018	0.0388402	0.0234472		125AlaH	9.03594	132.018	0.0388402		9.03749	132.296	0.042622	0.0416973		125AlaH	9.02215	132.266	0.0402679		9.02063	132.263	0.045866	0.00158779
126LeuH	8.03336	119.465	0.0712393		8.07227	119.826	0.082286	0.0666945		126LeuH	8.03336	119.465	0.0712393		8.02503	119.636	0.0463762	0.0270957		126LeuH	8.02503	119.636	0.0463762		8.06812	119.786	0.0402153	0.0486079		126LeuH	8.07227	119.826	0.082286		8.07037	120.013	0.0935036	0.0281008
127LysH	8.83451	119.624	0.0402379		8.84078	120.486	0.03914	0.129461		127LysH	8.83451	119.624	0.0402379		8.82322	119.618	0.0367791	0.011322		127LysH	8.82322	119.618	0.0367791		8.85051	120.26	0.0368566	0.100125		127LysH	8.84078	120.486	0.03914		8.84588	120.451	0.041204	0.00724758
129ThrH	6.9382	107.217	0.0475312		6.94908	107.357	0.0329577	0.0236005		129ThrH	6.9382	107.217	0.0475312		6.95752	107.207	0.0550711	0.0193753		129ThrH	6.95752	107.207	0.0550711		6.95564	107.254	0.0392117	0.00722682		129ThrH	6.94908	107.357	0.0329577		6.95041	107.39	0.0412907	0.00518208
130Gly	7.771	115.284	26.1195		8.087	116.266	27.306	0.359991		130Gly	7.771	115.284	26.1195		7.81	115.363	0.0379571	0.0407606		130Gly	7.81	115.363	0.0379571		8.024	116.013	0.0378771	0.235164		130Gly	8.087	116.266	27.306		8.096	116.313	0.0507229	0.0114325
131GlnH	6.74279	118.1	0.0397844		6.68744	117.969	0.0573905	0.058728		131GlnH	6.74279	118.1	0.0397844		6.74034	118.098	0.0374869	0.00248156		131GlnH	6.74034	118.098	0.0374869		6.711	117.992	0.0855876	0.033357		131GlnH	6.68744	117.969	0.0573905		6.69701	117.996	0.0591204	0.0103455
132TyrH	8.71379	120.698	0.0375671		8.95099	121.258	0.0458026	0.251636		132TyrH	8.71379	120.698	0.0375671		8.71624	120.715	0.0367918	0.0035384		132TyrH	8.71624	120.715	0.0367918		n.d.	n.d.	n.d	n.d		132TyrH	8.95099	121.258	0.0458026		8.95375	121.279	0.0580158	0.00417232
133LysH	8.34914	125.794	0.0365759		8.39206	126.829	0.0390353	0.161007		133LysH	8.34914	125.794	0.0365759		8.34157	125.813	0.0390029	0.00806208		133LysH	8.34157	125.813	0.0390029		8.39396	126.624	0.040431	0.132544		133LysH	8.39206	126.829	0.0390353		8.39599	126.816	0.0427073	0.00439052
134LeuH	8.81215	130.482	0.0392092		8.89968	129.806	0.0417679	0.133958		134LeuH	8.81215	130.482	0.0392092		8.79805	130.149	0.0376284	0.0518485		134LeuH	8.79805	130.149	0.0376284		8.88427	130.091	0.0362026	0.086653		134LeuH	8.89968	129.806	0.0417679		8.90167	129.88	0.0475773	0.0112888
135GlyH	9.97293	113.138	0.0413422		9.93442	112.773	0.0387649	0.0669163		135GlyH	9.97293	113.138	0.0413422		9.97571	113.011	0.0451913	0.0192844		135GlyH	9.97571	113.011	0.0451913		9.95818	112.801	0.041884	0.035951		135GlyH	9.93442	112.773	0.0387649		9.93806	112.889	0.0404768	0.017759
136SerH	6.55422	113.41	0.0396586		6.57442	113.138	0.037774	0.0454985		136SerH	6.55422	113.41	0.0396586		6.55457	113.246	0.0402746	0.0244855		136SerH	6.55457	113.246	0.0402746		6.5757	113.135	0.0389539	0.0269686		136SerH	6.57442	113.138	0.037774		6.56844	113.181	0.0371613	0.00885961
137LysH	7.94562	122.982	0.0436605		7.93351	122.766	0.0345676	0.0346468		137LysH	7.94562	122.982	0.0436605		7.94621	122.949	0.0686409	0.00504015		137LysH	7.94621	122.949	0.0686409		7.94737	122.774	0.0350602	0.0262696		137LysH	7.93351	122.766	0.0345676		7.92898	122.804	0.0342342	0.0073669
142GlnH	6.9392	120.415	0.0395436		6.97907	120.841	0.0387259	0.0752749		142GlnH	6.9392	120.415	0.0395436		6.94189	120.449	0.0377422	0.00576727		142GlnH	6.94189	120.449	0.0377422		6.97895	120.739	0.0406055	0.0571234		142GlnH	6.97907	120.841	0.0387259		6.98214	120.843	0.0385046	0.00309017
144AlaH	7.89418	117.21	0.0358		n.d.	n.d.	n.d.	n.d		144AlaH	7.89418	117.21	0.0358		7.86406	117.178	0.0362139	0.0305058		144AlaH	7.86406	117.178	0.0362139		n.d.	n.d.	n.d	n.d		144AlaH	n.d.	n.d.	n.d.		n.d.	n.d.	n.d.	n.d
145IleH	6.46457	104.409	0.0381028		6.36497	103.912	0.0396059	0.124472		145IleH	6.46457	104.409	0.0381028		6.42299	104.275	0.038319	0.0462089		145IleH	6.42299	104.275	0.038319		6.38884	103.91	0.0388979	0.0645401		145IleH	6.36497	103.912	0.0396059		6.36599	104.011	0.0403427	0.0149598
146LeuH	7.18117	124.763	0.0389001		7.27303	124.939	0.0351025	0.0955829		146LeuH	7.18117	124.763	0.0389001		7.19431	124.839	0.037321	0.0173989		146LeuH	7.19431	124.839	0.037321		7.26275	124.952	0.04007	0.0704908		146LeuH	7.27303	124.939	0.0351025		7.27569	124.962	0.0373013	0.00428782
147PheH	10.0401	123.962	0.0394873		10.0168	123.85	0.0448548	0.0287203		147PheH	10.0401	123.962	0.0394873		10.0403	123.871	0.0376267	0.0136965		147PheH	10.0403	123.871	0.0376267		10.0358	123.824	0.0400311	0.00823095		147PheH	10.0168	123.85	0.0448548		10.0152	123.851	0.0447496	0.00152373
148LeuH	10.4676	131.452	0.0389776		10.4986	131.568	0.0389214	0.0355224		148LeuH	10.4676	131.452	0.0389776		10.504	131.382	0.0389115	0.0378834		148LeuH	10.504	131.382	0.0389115		10.5137	131.623	0.0431099	0.0374001		148LeuH	10.4986	131.568	0.0389214		10.4949	131.558	0.0352478	0.00402693
150MetH	9.6398	127.532	0.0474765		9.6593	127.641	0.0380206	0.0254793		150MetH	9.6398	127.532	0.0474765		9.66173	127.626	0.0377326	0.0260855		150MetH	9.66173	127.626	0.0377326		9.67348	127.679	0.0426689	0.0142129		150MetH	9.6593	127.641	0.0380206		9.66162	127.747	0.0428192	0.0161099
152AlaH	8.7287	130.148	0.0406321		n.d.	n.d.	n.d.	n.d		152AlaH	8.7287	130.148	0.0406321		n.d.	n.d.	n.d.	n.d		152AlaH	n.d.	n.d.	n.d.		n.d.	n.d.	n.d	n.d		152AlaH	n.d.	n.d.	n.d.		n.d.	n.d.	n.d.	n.d
154SerH	8.01313	124.64	0.0364138		8.03496	124.698	0.0386534	0.0235159		154SerH	8.01313	124.64	0.0364138		8.03872	124.677	0.038291	0.0261805		154SerH	8.03872	124.677	0.038291		8.04402	124.698	0.0334651	0.00612971		154SerH	8.03496	124.698	0.0386534		8.06239	124.677	0.047022	0.0276256
																				* Since replacement of heparin by IP3 was completed at low IP3 concentration (no further change in signal chemical shifts with increasing concentration of the titrant), IP3 titration was stopped at 450 µM.

## Sheet: Fig.2
	Long-chain Heparin			raw data						normalized to PIP2+0µM Heprin
	Pellet	Heparin conc. (µM)	Liposomes	Exp1	Exp2	Exp3	mean (n=3)	SD (n=3)		Exp1	Exp2	Exp3	mean (n=3)	SD (n=3)
	FGF2 signal	0	PM	76065	67625	37278	60322.7	20398.6		3.61731	2.8374	2.39114	2.94862	0.620608
		0	PIP2	2102804	2383347	1559007	2.01505e+06	419117		104.355	118.277	77.3681	100	20.7993
		2.5	PIP2	1785819	1974096	1581251	1.78039e+06	196479		84.9256	82.8287	101.427	89.727	10.1864
		5	PIP2	1340591	1060377	822455	1.07447e+06	259356		63.7525	44.4911	52.7551	53.6662	9.663
		12.5	PIP2	507437	331693	309170	382767	108553		24.1314	13.9171	19.8312	19.2933	5.12837
		25	PIP2	383285	222905	156546	254245	116573		18.2273	9.3526	10.0414	12.5404	4.93702
		50	PIP2	289372	140934	111950	180752	95177.4		13.7612	5.91328	7.18085	8.95179	4.21305
		100	PIP2	316056	101055	105151	174087	122966		15.0302	4.24005	6.74474	8.67167	5.64728
		175	PIP2	191845	114677	98236	134919	49979.7		9.12329	4.81159	6.30119	6.74536	2.1899
		250	PIP2	186746	117738	77080	127188	55440.4		8.88081	4.94003	4.94417	6.255	2.27402
	Long-chain Heparin			raw data						normalized to PM+0µM Heparin
	Supernatant	Heparin conc. (µM)	Liposomes	Exp1	Exp2	Exp3	mean (n=3)	SD (n=3)		Exp1	Exp2	Exp3	mean (n=3)	SD (n=3)
	FGF2 signal	0	PM	2145963	2040640	1459384	1.882e+06	369762		114.026	108.43	77.5445	100	19.6473
		0	PIP2	840058	920477	840114	866883	46413.8		39.146	45.1073	57.5663	47.2732	9.39925
		2.5	PIP2	1106715	1199323	1065712	1.12392e+06	68446.3		51.572	58.7719	73.0248	61.1229	10.9179
		5	PIP2	1490178	1596095	1216378	1434217	195946		69.441	78.2154	83.3487	77.0017	7.03286
		12.5	PIP2	1697679	1772528	1599816	1.69001e+06	86611.2		79.1104	86.8614	109.623	91.8648	15.8596
		25	PIP2	1749369	1795269	1645037	1.72989e+06	76986.6		81.5191	87.9758	112.721	94.0721	16.4702
		50	PIP2	1792917	1890092	1622327	1.76845e+06	135550		83.5484	92.6225	111.165	95.7787	14.0763
		100	PIP2	1698904	1728476	1605119	1.6775e+06	64403.8		79.1674	84.7026	109.986	91.2854	16.43
		175	PIP2	1699333	1674840	1508715	1.62763e+06	103708		79.1874	82.0743	103.38	88.214	13.2135
		250	PIP2	1673389	1598035	1383709	1551711	150293		77.9785	78.3105	94.8146	83.7012	9.62593
	Disacharide Heparin			raw data						normalized to PIP2+0µM Heprin
	Pellet	Heparin conc. (µM)	Liposomes	Exp1	Exp2	Exp3	mean (n=3)	SD (n=3)		Exp1	Exp2	Exp3	mean (n=3)	SD (n=3)
	FGF2 signal	0	PM	53683	43649	39497	45609.7	7293.41		2.05964	2.23332	2.51476	2.26924	0.229677
		0	PIP2	2606425	1954441	1570605	2.04382e+06	523663		127.527	95.6267	76.8464	100	25.6217
		2.5	PIP2	2768408	1859467	1637692	2.08852e+06	599149		106.215	95.1406	104.271	101.876	5.91305
		5	PIP2	2758220	1654291	1751462	2.05466e+06	611237		105.824	84.6427	111.515	100.661	14.1608
		12.5	PIP2	2684203	1555814	1659453	1966490	623714		102.984	79.604	105.657	96.0817	14.3325
		25	PIP2	2520255	1685100	1646879	1.95074e+06	493581		96.6939	86.219	104.856	95.9231	9.34254
		50	PIP2	2778887	1613968	1647413	2.01342e+06	663122		106.617	82.5795	104.89	98.0289	13.4074
		100	PIP2	2582508	1601355	1586064	1923309	570934		99.0824	81.9342	100.984	94.0003	10.4927
		175	PIP2	2311306	1474786	1574026	1786706	457019		88.6772	75.4582	100.218	88.1178	12.3893
		250	PIP2	2340422	1482364	1606627	1.8098e+06	463710		89.7943	75.8459	102.294	89.3113	13.2304
	Disacharide Heparin			raw data						normalized to PM+0µM Heparin
	Supernatant	Heparin conc. (µM)	Liposomes	Exp1	Exp2	Exp3	mean (n=3)	SD (n=3)		Exp1	Exp2	Exp3	mean (n=3)	SD (n=3)
	FGF2 signal	0	PM	2235856	1993372	2269947	2.16639e+06	150806		103.206	92.0135	104.78	100	6.96115
		0	PIP2	1002344	957826	1209071	1.05641e+06	134066		44.8304	48.0505	53.2643	48.7151	4.25601
		2.5	PIP2	1169692	989086	1327206	1.16199e+06	169191		52.3152	49.6187	58.4686	53.4675	4.53606
		5	PIP2	1152446	1065910	1227933	1148763	81074.3		51.5438	53.4727	54.0952	53.0373	1.33027
		12.5	PIP2	1240024	1066263	1284243	1.19684e+06	115227		55.4608	53.4904	56.5759	55.1757	1.56238
		25	PIP2	1176153	973011	1260492	1136552	147775		52.6041	48.8123	55.5296	52.3153	3.36793
		50	PIP2	1111044	987616	1224869	1107843	118659		49.6921	49.545	53.9602	51.0658	2.50776
		100	PIP2	1321117	1127850	1233055	1.22734e+06	96760.1		59.0877	56.58	54.3209	56.6629	2.38452
		175	PIP2	1222221	1128190	1257551	1202654	66863.4		54.6646	56.5971	55.4	55.5539	0.975393
		250	PIP2	1153900	1285900	1230524	1.22344e+06	66284.4		51.6089	64.5088	54.2094	56.7757	6.82212

## Sheet: Fig.6B
Sample		raw data			bound*5/(bound*5+unbound*20)*100
FGF2-Y81pCMF-GFP		Exp.1	Exp.2	Exp.3	Exp.1	Exp.2	Exp.3	Mean (n=3)	SD (n=3)
-WT	Bound	3922768	2390299	2163701	98.8553	96.3133	97.9619	97.7102	1.28955
-WT	Unbound	11356	22874	11254	1.1447	3.68669	2.03811
-C77A,C95A	Bound	3788461	2247156	2011160	99.1	93.0248	97.9193	96.6814	3.22124
-C77A,C95A	Unbound	8601	42124	10684	0.899953	6.97518	2.08073
-K127Q,R128Q,K133Q	Bound	677938	14589	10017	15.0201	0.351883	0.288966	5.22031	8.48691
-K127Q,R128Q,K133Q	Unbound	958902	1032847	864120	84.9799	99.6481	99.711
-K127Q,R128Q	Bound	3285575	3239601	2537773	91.2842	89.0183	93.4822	91.2615	2.23203
-K127Q,R128Q	Unbound	78427	99913	44235	8.71585	10.9817	6.51782
IL-1β_GFP	Bound	678339	36544	3104	14.1347	0.969016	0.0819348	5.06188	7.86979
IL-1β_GFP	Unbound	1030192	933676	946319	85.8653	99.031	99.9181
GFP	Bound	729209	6639	71601	24.6024	0.249893	2.44935	9.10055	13.47
GFP	Unbound	558691	662524	712915	75.3976	99.7501	97.5506
B	Bound	20% of sample loaded
UB	Unbound	5% of sample loaded

## Sheet: Fig.6C
corrected fluorescent units
FGF2-Y81pCMF-GFP-	PM+2PIP2						PM
one Exp. = mean of duplicate	Exp.1	Exp.2	Exp.3	Exp.4	Mean (n=4)	SD (n=4)	Exp.1	Exp.2	Exp.3	Exp.4	Mean (n=4)	SD (n=4)
WT	150.82	203.19	231.49	164.65	187.537	36.7371	1.48	1.7	1.4	1.9	1.62	0.225684
C77/95A	58.46	67.65	101.78	61.67	72.39	19.96	2.01	1.39	1.09	1.83	1.58	0.417772
K127Q, R128Q	2.6	2.37	2.73	2.13	2.4575	0.264244	1.36	1.33	1.2	2.19	1.52	0.452032
K127Q,R128Q,K133Q	3.24	2.61	3.31	2.4	2.89	0.453652	1.86	1.4	1.56	1.86	1.67	0.22891
IL-1β-GFP	3.1	3.04	4.84	2.33	3.3275	1.06725	2.8	2.2	0.86	2.04	1.975	0.812137
GFP	3.21	2.75	4.2	2.11	3.0675	0.879484	2.86	2.04	1.21	1.95	2.015	0.675006
normalized data	PM+2PIP2						PM
% of FGF2-Y81pCMF-GFP-WT	Exp.1	Exp.2	Exp.3	Exp.4	Mean (n=4)	SD (n=4)	Exp.1	Exp.2	Exp.3	Exp.4	Mean (n=4)	SD (n=4)
WT	80.4212	108.346	123.437	87.7958	100	19.5892	0.981302	0.836655	0.604778	1.15396	0.894175	0.23248
C77/95A	38.7614	33.294	43.9673	37.4552	38.3695	4.40025	1.33271	0.684089	0.470863	1.11145	0.899779	0.392738
K127Q, R128Q	1.72391	1.1664	1.17932	1.29365	1.34082	0.261718	0.901737	0.65456	0.518381	1.33009	0.851193	0.356525
K127Q,R128Q,K133Q	2.14826	1.28451	1.42987	1.45764	1.58007	0.386325	1.23326	0.68901	0.673895	1.12967	0.931458	0.291828
IL-1β-GFP	2.05543	1.49614	2.0908	1.41512	1.76437	0.358328	1.85652	1.08273	0.371506	1.23899	1.13744	0.6102
GFP	2.12836	1.35341	1.81433	1.28151	1.6444	0.399777	1.8963	1.00399	0.522701	1.18433	1.15183	0.569489

## Sheet: Fig.9
Sample								positive for	positive for	% of GUVs positive for
FGF2-Y81pCMF-GFP	long-chain Heparin	PIP2	Cholesterol	heparin disaccharide	Ni-NTA		GUVs counted	Alexa tracer	Translocation	Alexa tracer	Translocation		Chart Fig.9	Mean	SD	n	Mean	SD	n
-WT	-	+	+	-	-	Exp.1	88	28	3	31.8182	3.40909		PIP2 NO H +WT	32.779	10.872	15	1.487	1.24	15
						Exp.2	29	6	0	20.6897	0		PIP2+H+WT	29.631	10.964	17	23.12	7.259	17
						Exp.3	46	27	1	58.6957	2.17391		PIP2+DS+WT	41.704	12.425	5	4.743	2.671	5
						Exp.4	119	50	3	42.0168	2.52101		PIP2 noCholesterol+H+WT	16.685	5.735	6	6.357	3.007	6
						Exp.5	85	30	0	35.2941	0		noPIP2+H+WT	1.533	1.328	3	0	0	3
						Exp.6	95	34	1	35.7895	1.05263		Ni WT +H	10	6.482	3	0.667	0.611	3
						Exp.7	104	35	1	33.6538	0.961538		C77/95A+H	11.3	9.832	3	10.1	8.788	3
						Exp.8	59	12	0	20.339	0		K127Q/R128Q/K133Q +H	15.567	0.802	3	0	0	3
						Exp.9	56	16	1	28.5714	1.78571		K127Q/R128Q +H	26.367	0.666	3	1.567	0.058	3
						Exp.10	73	20	1	27.3973	1.36986		IL-1β-GFP +H	3.1	2.207	3	0	0	3
						Exp.11	89	35	1	39.3258	1.1236		GFP +H	1.375	0.386	4	0	0	4
						Exp.12	64	15	2	23.4375	3.125
						Exp.13	57	20	2	35.0877	3.50877
						Exp.14	25	4	0	16	0
						Exp.15	85	37	1	43.5294	1.17647
						Mean				32.7764	1.48051
						SD				10.8701	1.24345
						n				15	15
-WT	+	+	+	-	-	Exp.1	26	6	6	23.0769	23.0769
						Exp.2	30	11	10	36.6667	33.3333
						Exp.3	49	26	15	53.0612	30.6122
						Exp.4	101	53	42	52.4752	41.5842
						Exp.5	90	31	25	34.4444	27.7778
						Exp.6	96	38	26	39.5833	27.0833
						Exp.7	65	14	13	21.5385	20
						Exp.8	39	9	6	23.0769	15.3846
						Exp.9	83	15	15	18.0723	18.0723
						Exp.10	63	20	14	31.746	22.2222
						Exp.11	37	6	5	16.2162	13.5135
						Exp.12	49	15	10	30.6122	20.4082
						Exp.13	38	10	8	26.3158	21.0526
						Exp.14	51	10	8	19.6078	15.6863
						Exp.15	52	14	13	26.9231	25
						Exp.16	120	34	26	28.3333	21.6667
						Exp.17	91	19	15	20.8791	16.4835
						Mean				29.5664	23.1152
						SD				10.9257	7.26074
						n				17	17
-WT	-	+	+	+	-	Exp.1	125	51	8	40.8	6.4
						Exp.2	101	56	6	55.4455	5.94059
						Exp.3	51	15	3	29.4118	5.88235
						Exp.4	91	27	5	29.6703	5.49451
						Exp.5	47	25	0	53.1915	0
						Mean				41.7038	4.74349
						SD				12.425	2.67109
						n				5	5
-WT	+	+	-	-	-	Exp.1	61	14	6	22.9508	9.83607
						Exp.2	54	11	2	20.3704	3.7037
						Exp.3	66	8	3	12.1212	4.54545
						Exp.4	74	13	6	17.5676	8.10811
						Exp.5	77	15	7	19.4805	9.09091
						Exp.6	105	8	3	7.61905	2.85714
						Mean				16.6849	6.3569
						SD				5.73508	3.00717
						n				6	6
-WT	+	-	+	-	-	Exp.1	86	2	0	2.32558	0
						Exp.2	104	0	0	0	0
						Exp.3	88	2	0	2.27273	0
						Mean				1.53277	0
						SD				1.32768	0
						n				3	3
-WT	+	-	+	-	+	Exp.1	91	4	0	4.3956	0
						Exp.2	129	11	1	8.52713	0.775194
						Exp.3	82	14	1	17.0732	1.21951
						Mean				9.99864	0.664902
						SD				6.46561	0.617192
						n				3	3
-C77/95A	+	+	+	-	-	Exp.1	22	0	0	0	0
						Exp.2	25	4	4	16	16
						Exp.3	84	15	12	17.8571	14.2857
						Mean				11.2857	10.0952
						SD				9.81773	8.78465
						n				3	3
-K127Q,R128Q,K133Q	+	+	+	-	-	Exp.1	27	4	0	14.8148	0
						Exp.2	55	9	0	16.3636	0
						Exp.3	103	16	0	15.534	0
						Mean				15.5708	0
						SD				0.775067	0
						n				3	3
-K127Q,R128Q	+	+	+	-	-	Exp.1	135	36	2	26.6667	1.48148
						Exp.2	125	32	2	25.6	1.6
						Exp.3	127	34	2	26.7717	1.5748
						Mean				26.3461	1.55209
						SD				0.648276	0.0624372
						n				3	3
IL-1β-GFP	+	+	+	-	-	Exp.1	104	3	0	2.88462	0
						Exp.2	102	1	0	0.980392	0
						Exp.3	56	3	0	5.35714	0
						Mean				3.07405	0
						SD				2.19452	0
						n				3	3
GFP	+	+	+	-	-	Exp.1	72	1	0	1.38889	0
						Exp.2	108	2	0	1.85185	0
						Exp.3	85	1	0	1.17647	0
						Exp.4	104	1	0	0.961538	0
						Mean				1.34469	0
						SD				0.380469	0
						n				4	4

## Sheet: Fig.11
FGF2-Y81pCMF-HALO-StarRed				FGF2-Y81pCMF-C7795A-HALO-StarRed				Monomer control		FRAP
Peak Intensity	Monomers per Cluster	Sample		Peak Intensity	Monomers per Cluster	Sample		mEGFP-HALO-StarRed		time [s]	Normalizes Fl. Recovery
154.809	8.60047	1		53.223	2.95684	1		Brightness [kHz]		0.206	0.261778
129.001	7.16674	1		29.6796	1.64887	1		32.8269		0.412	0.29066
165.57	9.19832	1		33.853	1.88072	2		25.2184		0.618	0.345965
197.973	10.9985	1		39.7877	2.21043	2		7.77899		0.824	0.403113
66.0873	3.67152	1		63.6251	3.53473	3		18.0418		1.03	0.466407
70.5076	3.91709	1		30.2379	1.67988	4		60.4015		1.236	0.526014
109.131	6.06283	1		37.9526	2.10848	4		15.2175		1.442	0.535846
105.203	5.84463	1		68.1338	3.78521	5		29.9008		1.648	0.522941
168.461	9.35894	1		37.3274	2.07374	5		45.1931		1.854	0.549365
138.136	7.67422	1		28.9551	1.60862	5		31.7866		2.06	0.585006
174.69	9.705	1		25.4158	1.41199	5		14.0296		2.266	0.607128
133.319	7.40663	1		43.0395	2.39108	5		22.1614		2.472	0.616346
530.928	29.496	1		45.843	2.54683	5		14.5885		2.678	0.621876
89.8367	4.99093	1		32.9829	1.83238	5		24.4417		2.884	0.592995
201.757	11.2087	1		40.1352	2.22973	6		29.436		3.09	0.671651
99.1812	5.51007	1		53.7527	2.98626	6		20.1421		3.296	0.729414
155.431	8.63504	1		47.8027	2.65571	7		23.6676		3.502	0.658132
249.327	13.8515	1		40.8951	2.27195	7		25.3813		3.708	0.762597
62.8581	3.49212	1		38.8768	2.15982	7		44.2397		3.914	0.747849
193.922	10.7734	1		52.2926	2.90515	7		14.6025		4.12	0.717124
513.252	28.514	1		41.1526	2.28625	7		10.9592		4.326	0.736174
124.084	6.89356	1		60.4638	3.3591	7		55.0905		4.532	0.723269
83.9321	4.6629	1		31.4824	1.74902	8		30.1408		4.738	0.734945
98.7437	5.48576	1		55.4426	3.08014	9		20.5753		4.944	0.785334
87.0438	4.83577	1		45.8529	2.54739	9		22.1205		5.15	0.74109
117.181	6.51004	1						64.8983		5.356	0.806841
96.254	5.34745	1						25.8133		5.562	0.723269
201.968	11.2204	1						18.311		5.768	0.794551
91.4158	5.07866	1						15.0123		5.974	0.822819
38.502	2.139	1						28.9487		6.18	0.801311
142.244	7.90246	1						18.6788		6.386	0.816059
188.069	10.4483	1						14.6474		6.592	0.840639
73.3512	4.07507	1						29.6342		6.798	0.811757
145.445	8.08029	1						24.864		7.004	0.869521
93.2618	5.18121	1						32.3024		7.21	0.796395
121.684	6.76022	1						20.3987		7.416	0.889185
31.0337	1.7241	1						22.2619		7.622	0.842483
114.685	6.37137	1						12.1442		7.828	0.852929
62.4094	3.46719	1						13.3665		8.034	0.79578
55.7887	3.09937	1						28.8003		8.24	0.865219
152.373	8.46519	1						13.1206		8.446	0.90086
93.0772	5.17095	1						32.6096		8.652	0.915608
124.407	6.9115	1						34.4066		8.858	0.892872
220.385	12.2436	1						23.4352		9.064	0.844941
155.68	8.64888	1						13.7363		9.27	0.849242
135.244	7.51355	1						26.0826		9.476	0.893486
164.991	9.16615	1						18.8593		9.682	0.857231
59.6269	3.3126	1						27.9931		9.888	0.87628
419.14	23.2855	1						8.62019		10.094	0.948177
45.5115	2.52842	1						21.8253		10.3	0.873822
137.34	7.63002	1						41.4464		10.506	0.866448
78.1301	4.34056	1						22.1051		10.712	0.921139
59.5055	3.30586	1						22.2648		10.918	0.905162
69.944	3.88578	1						29.4741		11.124	0.881811
260.139	14.4521	1						25.784		11.33	0.935272
666.149	37.0083	1						21.9838		11.536	0.973986
72.0583	4.00324	1						23.5213		11.742	0.927898
127.769	7.09827	1						28.1166		11.948	0.941417
64.2409	3.56894	1						16.7707		12.154	0.935272
34.0985	1.89436	1						20.1891		12.36	0.897173
56.719	3.15105	1						19.7374		12.566	0.889799
309.472	17.1929	1						17.1353		12.772	0.917452
468.636	26.0353	1						21.6599		12.978	0.910078
310.811	17.2673	1						30.0876		13.184	0.987505
99.4949	5.5275	1						35.3749		13.39	0.89533
498.302	27.6834	1						12.367		13.596	0.916837
57.3696	3.1872	1						9.97916		13.802	0.965383
290.843	16.158	1						16.9511		14.008	0.941417
64.3811	3.57673	1						28.3402		14.214	0.921753
177.048	9.83598	1						16.6201		14.42	0.910078
111.98	6.2211	1						26.3418		14.626	0.905776
40.8084	2.26713	1						18.4784		14.832	0.918066
158.287	8.79373	1						19.334		15.038	0.91315
79.2845	4.40469	1						35.0224		15.244	0.88857
195.824	10.8791	1						28.0714		15.45	0.92544
118.202	6.56677	1						11.2923		15.656	0.866448
30.1886	1.67714	1						7.97122		15.862	0.879967
30.9363	1.71868	1						17.8443		16.068	0.911921
196.819	10.9344	1						29.6812		16.274	0.917452
196.254	10.903	1						31.7245		16.48	0.943261
66.7648	3.70916	1						19.6758		16.686	0.96907
256.385	14.2436	1						23.9228		16.892	0.967227
109.401	6.07782	1						18.0794		17.098	0.875051
83.4028	4.63349	1						21.2485		17.304	0.918681
352.429	19.5794	1						23.5272		17.51	0.929127
135.596	7.53311	1						22.4722		17.716	0.918066
46.7823	2.59902	1						5.40759		17.922	0.889185
43.9579	2.44211	1						44.7014		18.128	0.928513
162.451	9.02506	1						17.1051		18.334	0.916223
79.9244	4.44025	1						15.2499		18.54	0.975215
68.8107	3.82282	1						21.869		18.746	0.93773
56.4561	3.13645	1						23.5056		18.952	0.926669
125.244	6.95801	1						41.248		19.158	0.929742
50.6048	2.81138	1						14.5093		19.364	0.989963
33.2328	1.84626	1						44.9614		19.57	0.964154
49.4842	2.74912	1						8.42516		19.776	0.965383
179.287	9.96042	1						12.3251		19.982	0.983204
77.6502	4.3139	1						24.0998		20.188	0.949406
103.259	5.73664	1						28.9319		20.394	0.94449
198.318	11.0177	1						37.3732		20.6	1.03236
54.4617	3.02565	1						15.5567
344.32	19.1289	1						12.2839
216.495	12.0275	1						18.1999
33.0255	1.83475	1						26.9352
140.059	7.78104	1						11.3673
169.094	9.39409	1						27.9726
195.159	10.8422	1						16.9709
190.659	10.5922	1						20.9539
210.555	11.6975	1						24.0758
259.471	14.4151	1						31.7553
268.354	4.4923	1						18.1955
216.792	12.044	1						23.9618
185.883	10.3268	1						12.915
120.385	6.68803	1						19.9292
58.8848	3.27138	1						17.3988
72.4574	4.02541	1						11.0539
743.375	41.2986	1						22.9368
150.374	8.35409	1						9.154
107.581	5.97675	1						9.86557
54.7094	3.03941	1						61.5602
97.2794	5.40441	1						17.3282
113.307	6.29486	1						19.8646
352.688	19.5938	1						35.6477
54.7318	3.04066	1						25.2122
160.693	8.92737	1						26.4923
85.6582	4.75879	1						19.0215
357.552	19.864	1						19.1193
200.791	11.155	1						17.6425
51.9426	2.8857	1						26.3053
63.7607	3.54226	1						24.0404
98.3598	5.46443	1						14.1576
109.504	6.08357	1						18.1086
627.062	34.8368	1						13.8781
197.293	10.9607	1						21.3621
203.993	11.3329	1						31.8923
158.261	8.79227	1						31.8664
103.464	5.74798	1						34.5017
102.099	5.67218	1						28.5916
51.1624	2.84236	1						32.6837
354.499	19.6944	1						39.9523
31.8974	1.77208	1						29.5088
152.199	8.45552	1						16.4591
62.0209	3.44561	1						15.6285
140.685	7.81583	1						22.7655
143.878	7.99322	1						19.0218
109.337	6.07428	1						31.4904
192.572	10.6984	1						36.6879
98.7212	5.48451	1						13.2745
95.1775	5.28764	1						15.7192
147.244	8.18023	1						32.0425
52.631	2.92394	1						30.1216
274.667	15.2593	1						23.7371
167.519	9.30661	1						32.147
96.757	5.37539	1						23.0398
109.332	6.07397	1						19.4152
288.597	16.0331	1						26.9459
109.939	6.10774	1						14.3799
139.249	7.73604	1						40.0367
551.584	30.6436	1						23.1705
90.0769	5.00427	1						29.6389
42.043	2.33572	1						21.4329
258.624	14.368	1						24.5657
60.1953	3.34418	1						28.7429
430.28	23.9044	1						21.5078
137.908	7.66154	1						18.3155
252.526	14.0292	1						30.8204
141.539	7.86326	1						32.3172
122.815	6.82306	1						11.868
289.921	16.1067	1						19.4564
236.392	13.1329	1						25.7618
299.496	16.6387	1						17.9521
138.062	7.67011	1						55.0968
98.5838	5.47688	1						35.1066
77.4247	4.30137	1						16.5179
86.8866	4.82703	1						7.4825
197.252	10.9584	1						23.9909
313.265	17.4036	1						24.2071
36.9995	2.05553	1						31.7612
115.77	6.43165	1						14.3476
91.0727	5.0596	1						14.9662
258.333	14.3518	1						46.4786
219.331	12.185	1						17.2483
119.386	2.39255	1						41.7008
165.57	9.19832	1						28.608
98.405	5.46694	1						21.4175
120.469	6.6927	1						9.54199
93.1282	5.17379	1						36.3206
107.985	5.99916	1						20.644
142.235	7.90196	1						17.779
269.236	14.9576	1						15.018
36.8063	2.04479	1						47.2325
236.112	13.1174	1						41.3593
99.5129	5.52849	1						30.2751
357.705	19.8725	1						34.6527
313.657	17.4254	1						28.838
38.0893	0.536118	1						19.1369
191.961	10.6645	1						21.8485
106.068	5.89266	1						36.6567
234.398	13.0221	1						20.8627
74.3626	4.13126	1						18.5446
159.184	8.84357	1						24.6601
160.57	8.92055	1						14.4281
83.2509	4.62505	1						28.2292
87.9935	4.88853	1						23.52
66.7362	3.70756	1						12.958
133.382	7.41014	2						48.7009
82.7043	4.59468	2						4.25552
26.2782	1.4599	2						22.7643
134.093	7.44958	2						23.0272
142.195	7.89971	2						11.893
169.004	9.38911	2						27.9657
38.1284	2.11825	2						19.1339
168.675	9.37082	2						23.9878
91.5637	5.08687	2						67.0666
68.1197	3.78443	2						27.0751
134.579	7.47663	2						23.518
195.53	10.8628	2						31.6858
126.729	7.0405	2						10.6009
25.3436	0.361562	2						19.708
45.8029	2.5446	2						23.7197
118.534	6.5852	2						13.3777
86.185	4.78806	2						17.3813
114.393	6.35517	2						47.2211
143.99	7.99946	2						18.3348
106.597	5.92203	2						31.2445
143.44	7.96891	2						60.8879
116.299	6.46106	2						32.3251
50.3983	2.79991	2						42.3016
87.5581	4.86434	2						26.8094
94.7693	5.26496	2						15.4091
177.284	9.84911	2						23.2379
254.122	14.1179	2						26.8803
157.226	8.73475	2						13.0481
57.0682	3.17046	2						24.7935
29.3506	1.63059	2						25.4802
56.5445	3.14136	2						25.1387
17.5585	0.975472	2						19.2421
70.0275	3.89041	2						12.8762
296.215	16.4564	2						23.1735
59.4613	1.50119	2						11.4268
53.5571	2.97539	2						11.8457
226.906	12.6059	2						23.933
223.773	12.4318	2						24.2722
107.526	5.97367	2						35.3017
79.742	4.43011	2						27.4965
88.2405	4.90225	2						23.2419
123.166	6.84255	2						24.0598
102.758	5.70877	2						21.3676
214.825	11.9347	2						20.2953
150.808	8.37821	2						25.5532
95.3619	5.29788	2						13.9455
157.909	8.77272	2						23.1378
68.2858	3.79365	2						30.1306
100.763	5.59793	2						24.4134
90.6817	5.03787	2						30.9762
63.542	3.53011	2						23.2045
36.3263	2.01813	2						27.6628
80.7307	1.40688	2						28.9925
341.21	18.9561	2						23.751
116.549	6.47496	2						36.474
67.2894	3.7383	2						11.5876
144.827	8.04594	2						18.6782
53.7346	2.98526	2						11.4411
223.767	12.4315	2						30.6413
220.188	12.2327	2						11.7138
79.5641	4.42023	2						15.8587
141.577	7.86541	2						41.0969
1167.78	64.8764	2						15.0599
170.804	9.48909	2						9.71507
149.822	8.32346	2						15.2918
108.571	6.0317	2						14.4323
117.183	6.51019	2						48.0013
92.5687	5.14271	2						25.8359
104.376	5.79867	2						48.3493
232.073	12.893	2						28.8639
454.808	25.2671	2						15.4506
97.6004	5.42225	2						40.7109
2394.03	133.001	2						29.7215
103.211	5.73395	2						26.7254
63.9659	3.55366	2						29.4514
183.423	10.1902	2						16.012
91.6661	5.09256	2						20.2819
86.6927	4.81626	2						15.5742
139.926	7.77366	2						16.5472
148.346	8.24145	2						22.8893
772.253	42.903	2						18.1398
99.0696	2.26076	2						20.739
52.5542	2.91968	2						31.4431
164.826	9.15698	2						19.0634
335.138	18.6188	2						19.6045
353.185	19.6214	2						27.5435
510.887	28.3826	2						43.1728
130.08	7.22666	2						22.2729
35.3781	1.96545	2						18.8958
162.78	9.04331	2						36.051
124.222	6.9012	2						21.4573
111.25	6.18054	2						17.7445
151.392	8.41068	2						18.3466
60.9775	3.38764	2						31.4625
25.1035	1.39464	2						25.3785
51.1577	2.8421	2						19.0923
113.156	6.28643	2						8.55347
254.135	14.1186	2						22.9759
208.474	11.5819	2						39.7666
61.6304	1.10022	2						18.7636
46.9107	2.60615	2						22.9778
63.683	3.53795	2						34.212
236.747	13.1526	2						26.2131
88.8537	4.93632	2						9.69362
342.235	19.013	2						65.7501
117.766	6.54254	2						18.3647
44.6248	2.47916	2						28.5328
429.573	23.8652	2						19.3003
260.265	14.4591	2						30.9673
109.852	6.10289	2						26.2449
92.7182	5.15101	2						26.9992
65.4852	3.63807	2						18.1779
118.016	6.55646	2						21.3601
130.239	7.2355	2						10.9843
183.086	10.1714	2						25.8619
81.9241	4.55134	2						13.3841
21.4597	1.1922	2						19.047
81.8647	4.54804	2						12.8903
125.96	6.99777	2						23.5929
117.15	6.50835	2						19.8687
188.255	10.4586	2						18.1386
41.9348	2.32971	2						24.0636
177.482	9.86011	2						14.0368
62.6141	3.47856	2						18.973
178.44	9.91334	2						26.312
175.833	9.76853	2						20.7554
73.7653	4.09807	2						18.7755
85.2289	4.73494	2						16.8543
108.974	6.05412	2						25.5694
45.3915	2.52175	2						16.3227
142.354	7.90856	2						20.0933
63.2219	3.51233	2						23.1639
50.4469	2.80261	2						9.11106
117.834	6.54631	2						38.1286
193.932	10.774	2						30.5839
118.992	6.61068	2						21.0245
86.8713	4.82618	2						32.7069
357.462	19.859	2						17.2118
35.9076	1.99486	2						16.9332
99.4787	5.52659	2						20.5843
98.257	5.45872	2						32.3442
90.2293	5.01274	2						23.0225
98.6369	5.47983	2						19.3555
101.796	5.65535	2						11.7736
626.771	34.8206	2						23.8863
120.68	6.70447	2						17.221
236.205	13.1225	2						16.7253
87.8269	4.87927	2						26.9386
91.1091	5.06161	2						13.6594
210.289	11.6827	2						12.6463
154.817	8.60094	2						19.422
108.11	6.00612	2						15.7551
115.486	6.41589	2						15.1126
385.461	21.4145	2						45.9149
135.311	7.51729	2						24.8536
115.916	6.43975	2						13.6494
77.4829	4.30461	2						23.9173
151.889	8.43828	2						22.6558
233.613	12.9785	2						10.8275
120.772	6.70958	2						61.5035
82.2645	4.57025	2						29.3739
127.662	7.09236	2						13.8917
82.7378	4.59655	2						16.2366
95.6572	5.31429	2						37.3316
82.8819	4.60455	2						22.9373
195.664	10.8702	2						5.78192
48.1039	2.67244	2						21.9845
99.2094	5.51163	2						23.9393
56.6837	3.14909	2						22.2215
107.27	5.95945	2						22.7836
107.18	5.95447	2						30.3042
160.496	8.91642	2						16.3881
68.8707	3.82615	2						9.97386
77.1706	4.28725	2						23.3893
90.056	5.00311	2						22.2181
92.8145	5.15636	3						25.1059
257.762	14.3201	3						22.4804
85.8792	4.77106	3						29.1906
128.722	7.15121	3						22.2084
131.474	7.3041	3						18.5316
77.3699	4.29833	3						43.8925
73.6237	4.09021	3						13.7664
87.9393	4.88552	3						12.0257
71.3274	3.96263	3						18.1365
63.5979	3.53322	3						39.7046
87.6675	4.87042	3						19.1433
38.9918	2.16621	3						31.8262
189.921	10.5512	3						12.6092
50.6151	2.81195	3						23.3425
42.3594	2.3533	3						8.85368
94.3435	5.24131	3						31.1916
26.329	1.46272	3						17.9883
96.6257	5.3681	3						25.1917
97.2796	5.40442	3						28.4324
83.9077	4.66154	3						19.0746
50.1292	2.78495	3						9.47808
112.001	6.22229	3						28.1948
154.097	8.56092	3						23.8721
55.123	3.06239	3						29.868
68.7597	3.81999	3						19.9048
83.7999	4.65555	3						22.9407
123.32	6.8511	3						23.2545
793.418	44.0788	3						14.9588
136.952	7.60842	3						29.4056
103.718	5.76213	3						26.1363
240.984	13.388	3						28.2247
82.5834	4.58796	3						22.9261
175.665	9.75917	3						20.9709
350.236	19.4575	3						14.2475
168.125	9.34026	3						30.6607
208.863	11.6035	3						14.6599
75.4377	4.19098	3						28.2952
71.7401	3.98556	3						21.311
209.353	11.6307	3						20.2392
72.5231	4.02906	3						21.6852
224.231	12.4573	3						32.8039
128.64	7.14668	3						18.2838
407.213	22.623	3						17.2442
62.1564	3.45313	3						11.7306
732.969	40.7205	3						28.4367
178.567	9.92037	3						28.016
52.8988	1.44218	3						22.7087
107.466	5.97035	3						16.0678
282.096	15.672	3						25.5381
93.4194	5.18997	3						68.892
61.6218	3.42344	3						24.9964
112.016	6.22313	3						32.5367
38.6722	2.14846	3						44.3661
39.9186	2.2177	3						18.106
165.372	9.18736	3						61.8902
176.263	9.79239	3						10.7706
41.1642	2.2869	3						26.5841
51.104	2.83911	3						12.0954
102.107	5.6726	3						47.9216
37.9417	2.10787	3						12.1102
80.3957	4.46643	3						11.8824
149.598	8.311	3						18.4488
131.05	7.28054	3						69.0794
129.279	7.18218	3						27.7692
117.783	6.5435	3						23.6379
204.185	11.3436	3						21.9731
112.568	6.25377	3						11.5746
105.631	5.86841	3						22.8259
56.4733	3.13741	3						20.3554
364.826	20.2681	3						6.62594
178.403	9.91128	3						35.7334
46.9963	2.6109	3						12.6036
41.4197	2.30109	3						28.6896
104.875	5.82641	3						20.4304
108.333	6.01851	3						27.9889
496.609	27.5894	3						12.8046
99.7221	5.54012	3						19.8986
126.439	7.02438	3						12.8758
21.0641	1.17023	3						27.8381
287.752	15.9862	3						21.025
130.26	7.23669	3						18.423
139.884	7.77131	3						20.6835
197.167	10.9537	3						35.4371
150.422	8.35677	3						26.0506
94.5199	5.2511	3						17.9442
54.6191	3.0344	3						20.4021
53.6296	2.97942	3						25.1121
186.982	10.3879	3						26.4457
282.382	15.6879	3						26.9896
320.912	17.8284	3						28.525
75.8406	4.21336	3						14.7246
118.844	6.60245	3						38.5407
92.2439	1.76766	3						9.17782
166.681	9.26006	3						29.3688
57.3254	3.18475	3						26.2862
70.4005	3.91114	3						22.8893
132.067	7.33705	3						27.7249
291.885	16.2158	3						68.7258
66.326	3.68478	3						33.2684
179.453	9.96961	3						9.16663
108.263	6.01463	3						27.6403
130.209	7.23384	3						43.0925
195.33	10.8517	3						23.4515
90.2045	5.01136	3						16.3037
130.075	7.22638	3						25.31
49.2071	2.73373	3						25.2936
55.1051	3.0614	3						31.0671
309.114	17.173	3						35.7447
194.963	10.8313	3						15.7595
121.686	6.76036	3						7.89844
58.4761	3.24867	3						17.05
287.088	15.9493	3						12.3336
178.332	9.90733	3						20.9997
58.9262	3.27368	3						15.7867
56.2759	3.12644	3						18.2867
153.634	8.53524	3						19.1831
151.325	8.40694	3						7.71076
78.7363	4.37424	3						12.5166
124.358	6.90878	3						12.5476
42.6818	2.37121	3						35.3427
610.901	33.939	3						11.8887
303.366	16.8537	3						27.4219
385.972	21.4429	3						32.2998
166.636	9.25755	3						9.4359
58.2537	3.23631	3						19.968
41.1523	2.28624	3						23.4992
179.891	9.99395	3						12.3929
343.974	19.1096	3						14.4241
280.327	15.5737	3						9.13339
126.612	7.03399	3						37.9047
55.0171	3.0565	3						26.5722
74.415	4.13416	3						16.9203
69.5328	3.86294	3						18.6154
39.8433	2.21351	3						23.8919
196.594	10.9219	3						27.4811
131.448	7.30266	3						16.4822
166.531	9.25174	3						17.7829
120.585	6.69919	3						23.413
60.3516	3.35287	3						18.198
118.18	6.56557	3						30.7648
358.126	19.8959	3						24.6945
111.188	6.17709	3						20.9377
86.2731	4.79295	3						20.0962
68.7771	3.82095	3						31.5285
39.6068	2.20038	3						13.0446
54.2189	3.01216	3						8.60585
43.3264	2.40702	3						35.3128
117.383	6.5213	3						18.3018
285.322	15.8512	3						26.8547
64.0799	3.55999	3						33.7518
145.213	8.06739	3						23.2244
155.635	8.64642	3						21.758
130.873	7.27074	3						19.8937
182.512	10.1396	3						25.4802
59.3274	3.29597	3						14.6774
126.474	7.02635	3						24.1329
161.95	8.9972	3						47.9549
171.739	9.54105	3						22.3429
60.0139	3.33411	3						30.1907
357.619	19.8677	3						21.5403
73.0328	4.05738	3						7.95732
114.774	6.37632	3						16.1034
90.2074	1.98043	3						21.6788
99.7451	5.5414	3						4.96346
88.3371	4.90762	3						43.6493
121.801	6.76674	3						20.9687
146.392	8.13286	3						50.4206
83.2796	4.62664	3						20.6373
105.743	5.87459	3						34.4418
144.825	8.04585	3						19.3954
82.0196	4.55665	3						25.4289
384.234	21.3463	3						14.1972
96.9083	5.38379	3						14.02
75.8086	4.21159	3						32.8964
41.9863	2.33257	3						20.4759
318.233	17.6796	3						33.5241
95.6094	5.31163	3						13.7923
37.4698	2.08165	4						14.1881
113.784	6.32135	4						14.3245
96.6987	5.37215	4						11.9477
43.3126	2.40626	4						22.5304
49.9973	2.77763	4						27.8269
143.333	7.96292	4						42.3585
123.938	6.88544	4						37.6476
137.439	7.63552	4						58.2721
174.159	9.6755	4						8.67091
145.057	8.05873	4						26.2838
37.1487	2.06382	4						12.5722
48.6624	2.70347	4						13.7496
104.362	5.79788	4						29.4491
81.8392	4.54662	4						17.4503
34.5337	1.91854	4						19.0108
100.183	5.5657	4						14.9713
102.653	5.70294	4						18.6528
79.4578	4.41432	4						13.4531
30.0059	1.667	4						63.5562
65.1772	3.62096	4						16.6164
96.8752	5.38196	4						21.2463
128.947	7.16375	4						17.6721
95.7985	5.32214	4						19.2351
183.566	10.1981	4						23.6377
108.981	6.05449	4						22.1
54.4406	3.02448	4						26.9904
256.457	14.2476	4						36.1794
108.811	6.04505	4						54.7988
189.23	10.5128	4						30.3196
70.9536	3.94187	4						8.51773
140.488	2.71058	4						35.3071
87.2856	4.8492	4						9.27444
85.2631	4.73684	4						25.2537
94.8998	5.27221	4						25.6476
21.7211	0.53723	4						17.9067
73.9492	4.10829	4						21.0068
170.985	9.49917	4						17.7842
69.1193	3.83996	4						17.7919
51.3076	2.85042	4						19.44
54.8534	3.04741	4						10.6741
42.9136	2.38409	4						19.142
41.7596	2.31998	4						15.1423
109.967	6.10929	4						19.1135
135.782	7.54347	4						14.8255
121.873	6.77071	4						11.4623
108.327	6.01817	4						15.6658
40.9542	2.27524	4						35.9025
56.9515	1.46006	4						45.2832
56.1339	3.11855	4						22.676
120.012	6.66732	4						17.1199
97.9443	5.44135	4						22.4721
88.4219	4.91233	4						17.1226
64.2411	3.56895	4						20.9369
108.57	6.03167	4						21.4609
110.619	6.14548	4						8.05063
35.2063	1.95591	4						18.4987
326.348	18.1304	4						16.3855
359.657	19.981	4						26.555
73.3856	4.07698	4						19.5415
72.5764	4.03202	4						21.3084
92.9297	5.16276	4						25.4459
106.475	5.91528	4						13.9685
590.933	32.8296	4						19.9213
114.856	6.38088	4						13.3012
219.863	12.2146	4						8.08041
84.3306	4.68503	4						23.2622
131.43	7.30169	4						20.2354
66.4389	3.69105	4						22.6713
80.9665	4.49814	4						48.8074
187.781	10.4323	4						13.2032
130.791	7.26619	4						23.2839
139.043	7.72459	4						57.0158
92.1281	5.11823	4						12.2425
90.5524	5.03069	4						20.0655
55.9272	3.10707	4						27.5187
120.445	6.69139	4						42.969
63.7224	3.54013	4						20.1761
62.1395	3.4522	4						13.6802
54.0589	0.920607	4						27.7564
350.232	19.4573	4						15.6166
66.315	3.68417	4						13.491
58.0953	3.22752	4						34.1208
103.011	5.72285	4						24.5547
120.284	6.68243	4						19.4738
35.1991	1.95551	4						22.7552
68.5496	3.80831	4						19.9493
53.2826	2.96014	4						19.9481
76.9844	1.32023	4						38.7372
125.624	6.9791	4						25.0045
63.8291	3.54606	4						34.4899
23.7018	1.31677	4						21.1702
55.5681	3.08712	4						20.2576
19.1541	0.329271	4						24.9115
62.6064	3.47814	4						16.9288
90.7663	5.04257	4						18.1123
187.131	10.3962	4						13.2784
206.546	11.4748	4						25.0529
53.3666	2.96481	4						13.2754
95.4241	5.30134	4						20.5251
454.858	25.2699	4						17.2468
176.005	9.77807	4						21.9759
147.463	8.19238	4						20.4319
127.781	7.09896	4						11.3692
296.048	16.4471	4						4.70801
54.3754	3.02086	4						29.3263
89.6371	4.97984	4						9.052
349.56	19.42	4						14.8375
234.652	13.0362	4						33.7494
166.898	9.27211	4						26.3563
49.6041	2.75579	4						13.5544
82.3911	4.57728	4						27.0612
226.556	12.5864	4						60.0782
55.3987	3.07771	4						19.1792
125.515	6.97308	4						21.8863
241.995	13.4442	4						36.04
100.813	5.60072	4						15.5936
99.5264	5.52924	4						8.5491
106.481	5.91561	4						24.4528
146.125	8.11805	4						19.8366
251.481	13.9712	4						13.5437
134.236	7.45755	4						15.1014
100.757	5.59759	4						26.4977
53.2692	2.9594	4						22.1918
95.5242	5.3069	4						38.4008
66.6474	3.70263	4						21.9154
46.512	2.584	4						23.6691
113.13	6.28498	4						28.0901
57.1667	3.17593	4						13.937
27.2035	1.51131	4						13.2772
101.612	5.6451	4						28.639
281.667	15.6482	4						22.4892
46.2301	2.56834	4						29.6437
182.102	10.1168	4						15.6905
33.7482	1.8749	4						9.85185
192.716	10.7065	4						32.2286
64.5954	3.58864	4						14.9496
28.8111	1.60062	4						26.7149
65.8373	3.65763	4						17.6722
99.2636	5.51464	4						23.7883
410.207	22.7893	4						19.1826
44.8348	2.49082	4						17.6579
44.039	2.44661	4						9.21347
112.514	6.25075	4						26.4233
67.9001	3.77223	4						28.2821
56.9281	3.16267	4						18.5339
413.078	22.9488	4						39.9304
45.7647	2.54248	4						11.8637
67.3342	3.74079	4						8.45355
87.3269	4.8515	4						14.9821
186.839	10.38	4						27.5362
89.4973	4.97207	4						9.55946
103.359	5.74217	4						24.9885
229.724	12.7625	4						14.3366
61.5711	3.42062	4						21.8744
148.265	8.23692	4						27.7566
130.414	7.24523	4						22.9976
63.8703	3.54835	4						17.7836
149.904	8.32802	4						19.0537
66.4011	3.68895	4						19.3203
39.8287	2.2127	4						23.7068
108.716	6.03978	4						21.1149
153.028	8.50153	4						25.4511
58.9892	3.27718	4						33.0845
60.02	3.33444	4						18.8603
49.9078	2.77266	4						15.5685
50.6391	2.81328	4						8.72422
30.4961	1.69423	4						27.7995
91.6588	5.09215	4						27.555
55.5187	3.08437	4						18.2716
93.7074	5.20597	4						12.0065
40.1394	2.22997	4						13.5618
141.883	2.30747	4						32.5946
159.422	8.85679	4						31.703
86.5736	4.80964	4						27.0132
35.4517	1.96954	4						23.8623
111.626	6.20143	4						23.2315
61.6203	3.42335	4						15.9294
45.3628	2.52015	4						46.5311
163.493	9.08296	5						15.7355
52.0888	2.89382	5						10.8227
49.1492	2.73051	5						36.9844
52.5752	2.92085	5						13.5398
181.98	10.11	5						7.1967
395.838	21.991	5						17.8665
38.6129	2.14516	5						24.5863
145.201	8.06671	5						10.1728
43.885	2.43805	5						39.6326
36.6165	2.03425	5						15.489
124.815	6.93419	5						22.6966
120.704	6.70577	5						22.1789
55.2993	3.07218	5						9.07777
182.509	10.1394	5						42.5138
100.39	5.57724	5						10.7761
61.7419	3.4301	5						29.3315
374.43	20.8017	5						10.2322
39.1193	2.1733	5						13.8714
26.9989	1.49994	5						21.0155
92.8412	5.15784	5						35.0736
72.5635	4.03131	5						15.4623
47.5566	2.64203	5						16.1807
296.942	16.4968	5						18.6116
83.605	4.64472	5						47.8067
49.5611	2.7534	5						21.6307
65.8443	1.26376	5						13.8883
68.1651	3.78695	5						7.43899
125.289	6.96053	5						19.2055
205.057	11.392	5						17.4414
121.968	6.77597	5						29.4611
50.5254	2.80696	5						25.0861
146.528	8.14046	5						22.7467
225.532	12.5296	5						16.8538
160.827	8.93483	5						12.0445
316.24	17.5689	5						38.5453
63.9054	3.5503	5						54.6796
80.7624	4.4868	5						13.0199
221.413	12.3007	5						19.4803
156.585	8.69916	5						8.86216
352.971	19.6095	5						22.0874
92.2324	5.12402	5						29.7019
58.1446	3.23025	5						32.3002
59.4369	3.30205	5						30.5724
56.9245	3.16247	5						15.6625
124.492	6.91623	5						11.6721
42.8735	2.38186	5						11.6104
54.2681	3.01489	5						18.9931
40.9548	2.27527	5						24.717
42.4761	2.35978	5						15.9171
235.919	13.1066	5						40.0237
125.323	6.96239	5						13.59
122.511	6.80615	5						18.209
112.925	6.2736	5						15.8244
99.8463	5.54702	5						23.6534
42.0909	2.33838	5						30.8567
94.5447	5.25248	5						42.7338
138.32	7.68444	5						27.306
224.189	12.455	5						17.6597
269.733	14.9852	5						29.3904
39.7416	0.677179	5						28.2743
65.4029	3.6335	5						14.0153
233.221	12.9567	5						16.7626
162.972	9.05402	5						30.7521
135.204	7.51135	5						6.38654
76.0373	4.22429	5						19.886
76.1269	4.22927	5						17.0145
84.938	4.71878	5						19.26
102.982	5.72122	5						31.412
61.3769	3.40983	5						24.118
48.7461	2.70812	5						16.798
168.727	9.37372	5						35.7159
35.4502	1.96946	5						11.2797
139.902	7.77233	5						17.1509
150.009	8.33385	5						28.0079
46.7696	2.59831	5						36.587
74.7045	4.15025	5						9.83483
52.2247	2.90137	5						16.0181
112.812	6.26733	5						18.4592
101.621	5.64562	5						32.9416
66.9219	3.71788	5						21.3427
70.0857	3.89365	5						50.2062
130.263	7.23683	5						18.4739
86.9144	4.82858	5						16.5344
57.3077	3.18376	5						11.0328
98.9077	5.49487	5						33.0897
113.992	6.3329	5						18.677
41.0533	2.28074	5						9.78219
44.0128	2.44516	5						22.0695
226.093	12.5607	5						20.7855
99.8823	5.54902	5						10.3529
99.182	5.51011	5						29.9423
53.3358	2.9631	5						18.2057
381.265	21.1814	5						10.9133
114.029	6.33496	5						20.5513
102.789	5.7105	5						22.2805
221.824	12.3236	5						29.0259
63.7654	3.54252	5
264.11	14.6728	5
40.9237	2.27354	5
44.1921	2.45512	5
246.755	13.7086	5
227.578	12.6432	5
151.989	8.44383	5
2163.8	120.211	5
47.4086	2.63381	5
35.6943	1.98301	5
112.377	6.24315	5
72.5662	4.03145	5
50.6885	2.81603	5
93.9957	5.22198	5
94.9384	5.27436	5
112.855	6.26971	5
96.0471	5.33595	5
45.2172	2.51207	5
218.734	12.1519	5
192.7	10.7056	5
98.1104	5.45058	5
261.577	14.5321	5
43.9034	2.43908	5
50.4089	2.80049	5
112.338	6.24099	5
305.479	16.9711	5
148.33	8.24055	5
97.8836	5.43798	5
128.287	7.12705	5
101.216	5.62311	5
131.139	7.28552	5
127.986	2.35912	5
56.1839	3.12133	5
130.192	7.23291	5
44.4516	2.46953	5
61.0073	3.3893	5
36.2237	2.01243	5
65.9394	3.6633	5
113.984	6.33246	5
131.515	7.30637	5
279.321	15.5178	5
45.5344	2.52969	5
38.4189	2.13438	5
241.865	13.437	5
257.657	14.3143	5
232.609	12.9227	5
81.4299	4.52388	5
35.1188	1.95104	5
39.582	2.199	5
36.2523	2.01402	5
67.609	3.75606	5
462.626	25.7015	5
89.1924	4.95513	5
45.0213	2.50118	5
63.4339	3.52411	5
154.498	8.58322	5
38.0531	2.11406	5
228.851	12.7139	5
40.1247	2.22915	5
32.7462	1.81924	5
89.0462	4.94701	5
64.1775	3.56542	5
58.2167	3.23426	5
298.593	16.5885	5
144.498	8.02767	5
65.7374	3.65208	5
38.0085	2.11158	5
260.755	14.4864	5
61.5382	1.36935	5
67.0681	3.726	5
104.487	5.80484	5
71.0823	3.94902	5
109.393	6.07737	5
56.4125	3.13403	5
63.4084	3.52269	5
78.3654	4.35363	5
138.495	7.69415	5
43.9098	2.43943	5
301.268	16.7371	5
197.933	10.9963	5
164.526	9.14034	5
73.2321	4.06845	5
37.899	2.1055	5
185.252	10.2918	5
75.9082	4.21712	6
159.481	8.86004	6
133.265	7.40359	6
102.756	5.70866	6
89.7392	4.98551	6
41.1346	2.28526	6
42.03	2.335	6
143.638	7.97991	6
119.8	6.65554	6
51.8528	2.88071	6
135.682	7.5379	6
165.931	9.21836	6
30.0129	1.66738	6
171.961	9.55341	6
43.4253	2.41252	6
81.66	4.53666	6
106.539	5.91882	6
34.1757	1.89865	6
278.206	15.4559	6
90.2766	5.01537	6
213.556	11.8642	6
234.305	13.0169	6
59.6528	3.31404	6
142.974	7.94299	6
75.6846	4.2047	6
171.509	9.5283	6
263.181	14.6212	6
51.024	2.83467	6
44.94	2.49667	6
89.7839	4.98799	6
64.825	3.60139	6
155.557	8.64208	6
96.1305	5.34059	6
90.7019	5.039	6
118.892	6.60513	6
136.063	7.55906	6
281.713	15.6507	6
109.683	6.09351	6
48.9719	2.72066	6
394.595	21.9219	6
28.4927	1.58293	6
96.9869	5.38816	6
191.293	10.6274	6
243.497	13.5276	6
166.84	9.26891	6
52.3773	2.90985	6
50.1139	2.7841	6
66.4328	3.69071	6
38.7974	2.15541	6
90.7096	5.03942	6
176.887	9.82705	6
70.4575	3.91431	6
75.4158	4.18977	6
54.1727	3.0096	6
603.591	33.5328	6
69.9921	3.88845	6
88.6586	4.92548	6
40.6666	2.25925	6
41.1479	2.28599	6
77.4494	4.30274	6
30.4598	1.69221	6
31.6799	1.75999	6
83.8323	4.65735	6
165.974	9.22076	6
40.6743	2.25969	6
275.455	15.3031	6
70.569	3.9205	6
52.7264	2.92924	6
93.5107	5.19504	6
28.2429	1.56905	6
83.8158	4.65643	6
315.215	17.512	6
90.9397	5.0522	6
144.523	8.02907	6
56.9938	3.16632	6
98.3234	5.46241	6
74.0805	4.11558	6
80.7474	4.48597	6
111.862	6.21456	6
42.8855	2.38253	6
81.233	4.51295	6
82.9996	4.61109	6
37.2501	2.06945	6
45.0301	2.50167	6
45.5032	2.52796	6
165.679	9.20439	6
52.5382	2.91879	6
33.6341	1.86856	6
404.073	22.4485	6
156.972	8.72068	6
45.4768	2.52649	6
75.764	4.20911	6
62.2453	3.45807	6
270.071	15.004	6
86.3792	4.79884	6
88.5228	4.91793	6
75.4807	4.19337	6
109.664	6.09246	6
311.134	17.2852	6
43.1231	2.39573	6
95.2762	5.29312	6
114.35	6.35278	6
269.675	14.9819	6
124.297	6.90539	6
33.4948	1.86082	6
36.7284	2.04047	6
79.5998	4.42221	6
307.772	17.0984	6
28.0758	1.55977	6
74.4733	4.13741	6
76.3024	4.23902	6
60.3184	3.35102	6
40.372	2.24289	6
139.99	7.77724	6
86.4798	4.80443	6
167.32	9.29556	6
140.083	7.78239	6
46.3309	2.57394	6
59.482	3.30455	6
130.141	7.23003	6
44.8565	2.49203	6
145.616	8.08976	6
191.192	10.6218	6
124.185	6.89918	6
46.4711	2.58173	6
52.9025	2.93903	6
214.906	11.9392	6
66.9826	3.72126	6
84.8921	4.71623	6
27.6966	1.5387	6
222.606	12.367	6
65.5936	3.64409	6
71.7409	3.98561	6
45.0578	2.50321	6
106.701	5.92785	6
240.987	13.3882	6
577.587	32.0882	6
152.446	8.46925	6
419.71	23.3172	6
70.3735	3.90964	6
124.63	6.92388	6
132.129	7.34051	6
108.398	6.02212	6
288.054	16.003	6
254.137	14.1187	6
27.0449	1.50249	6
44.0354	2.44641	6
152.779	8.48771	6
101.993	5.66628	6
78.0232	4.33462	6
408.987	22.7215	6
28.9772	1.60984	6
138.972	7.72068	6
190.215	10.5675	6
29.7616	1.65342	6
121.759	6.76441	6
435.745	24.208	6
54.9887	3.05493	6
131.902	7.32789	6
140.025	7.77916	6
45.1972	2.51096	6
49.9608	2.7756	6
40.3532	2.24185	6
74.3423	4.13013	6
115.944	6.44131	6
39.1006	0.663901	6
169.634	9.42412	6
60.8784	3.38213	6
112.754	6.2641	6
92.9743	5.16524	6
44.8242	2.49023	6
46.9391	2.60773	6
57.7566	3.2087	6
268.81	14.9339	6
66.9416	3.71898	6

## Sheet: Fig.12
				Surface protein conc [nmol/m2] range
				0-0.4	>0.4	0-2.4
HisFGF2-Y81pCMF-WT-GFP	without memrane pores	%of GUVs in class		90	10	100
		Oligomeric State	Average	5.22252	14.1156	6.11183
			SD	2.85955	0.698091	3.83771
		Diffusion coefficient [µm2/s]	Average	2.76034	1.99927	2.68423
			SD	0.49585	0.622323	0.548699
		Surface protein concentration	Average	0.0931889	0.874006	0.171271
			SD	0.0676143	0.41924	0.270154
	with memrane pores	%of GUVs in class		43.3333	56.6667	100
		Oligomeric State	Average	5.23522	9.22533	7.49629
			SD	3.49759	2.95744	3.73255
		Diffusion coefficient [µm2/s]	Average	2.50898	1.72756	2.06618
			SD	0.804821	0.398599	0.714701
		Surface protein concentration	Average	0.234822	1.08069	0.714146
			SD	0.108017	0.599565	0.620412
HisFGF2-Y81pCMF-C77/95A-GFP	without memrane pores	%of GUVs in class		88.8889	11.1111	100
		Oligomeric State	Average	1.09085	1.82038	1.17191
			SD	0.461651	-	0.495596
		Diffusion coefficient [µm2/s]	Average	4.96884	3.83044	4.84235
			SD	1.03926	-	1.04357
		Surface protein concentration	Average	0.184668	0.664337	0.237964
			SD	0.103321	-	0.18683
	0-0.4	>0.4
	GUVs: PM+2%PIP2
	GUV		*Particle number	Brightness of a cluster	Oligomeric state	**Suface protein conc. I	Suface protein conc. II	Diffusion time	Diffusion coeficient	Diffusion coeficient
	Number			[counts/s]		[AU]	[nmol/m2]	[s]	[m2 /s]	[µm2 /s]
HisFGF2-Y81pCMF-WT-GFP	1	non-leaky	0.6156	0.0802077	3.81941	0.0493738	0.0218314	0.0047541	2.99524e-12	2.99524
without membrane pores	2	non-leaky	1.2136	0.0669482	3.18801	0.0787987	0.0359237	0.0053354	2.6689e-12	2.6689
	3	non-leaky	0.9574	0.0869343	4.13973	0.0832319	0.0368004	0.004001	3.55902e-12	3.55902
	4	non-leaky	0.912	0.0769158	3.66266	0.0701472	0.0310154	0.0044834	3.17608e-12	3.17608
	5	non-leaky	0.7734	0.0521713	2.48435	0.0403505	0.0178403	0.0036991	3.84949e-12	3.84949
	6	non-leaky	0.685	0.0844476	4.02132	0.0578422	0.0255767	0.0049705	2.86483e-12	2.86483
	7	non-leaky	0.9228	0.0522611	2.48862	0.0482244	0.0213232	0.0044155	3.22492e-12	3.22492
	8	non-leaky	0.9483	0.166754	7.94067	0.158121	0.069918	0.006135	2.32105e-12	2.32105
	9	non-leaky	1.2477	0.0998561	4.75505	0.124585	0.0550874	0.0050047	2.84526e-12	2.84526
	10	non-leaky	1.0029	0.200294	9.5378	0.200874	0.0888163	0.0053956	2.63912e-12	2.63912
	11	non-leaky	1.1743	0.130847	6.23081	0.153657	0.0679376	0.0056633	2.51437e-12	2.51437
	12	non-leaky	1.8749	0.21305	10.1452	0.399442	0.176615	0.0065821	2.16339e-12	2.16339
	13	non-leaky	1.7396	0.108313	5.15775	0.188423	0.0833099	0.005101	2.79154e-12	2.79154
	14	non-leaky	1.4644	0.1625	7.73812	0.237971	0.105216	0.0058935	2.41616e-12	2.41616
	15	non-leaky	2.0888	0.0218778	1.0418	0.0456971	0.0202054	0.0036502	3.90106e-12	3.90106
	16	non-leaky	2.4052	0.0360805	1.71812	0.0867833	0.0383699	0.0041721	3.41307e-12	3.41307
	17	non-leaky	3.3014	0.115087	5.48031	0.379919	0.167992	0.0050945	2.7951e-12	2.7951
	18	non-leaky	2.4628	0.171617	8.17225	0.422654	0.186878	0.0063963	2.22623e-12	2.22623
	19	non-leaky	1.1245	0.127822	6.08677	0.143738	0.0635525	0.0051736	2.75237e-12	2.75237
	20	non-leaky	1.4272	0.0940582	4.47896	0.134244	0.0593539	0.0056917	2.50183e-12	2.50183
	21	non-leaky	9.2171	0.0323975	2.15983	0.298599	0.184842	0.0057314	2.4845e-12	2.4845
	22	non-leaky	2.4327	0.0532299	3.54866	0.129498	0.0801566	0.005698	2.49906e-12	2.49906
	23	non-leaky	3.0098	0.0502317	3.34878	0.151189	0.093586	0.0048733	2.92197e-12	2.92197
	24	non-leaky	4.1569	0.0649192	4.32795	0.264025	0.167047	0.0060284	2.36209e-12	2.36209
	25	non-leaky	5.1399	0.0567261	3.78174	0.291566	0.180482	0.0060247	2.36354e-12	2.36354
	26	non-leaky	1.968	0.269786	12.8469	0.530949	0.234753	0.0069453	2.05026e-12	2.05026
	27	non-leaky	2.4947	0.182834	8.70638	0.456121	0.201671	0.0063894	2.22864e-12	2.22864
	28	non-leaky	3.286	0.299525	14.2631	0.984228	0.43518	0.0052619	2.70618e-12	2.70618
	29	non-leaky	7.3899	0.200333	13.3555	1.48051	0.916401	0.0092824	1.53405e-12	1.53405
	30	non-leaky	9.2901	0.220922	14.7281	2.05232	1.27044	0.0081019	1.75757e-12	1.75757
HisFGF2-Y81pCMF-WT-GFP	1	leaky	0.9844	0.152004	7.23827	0.149628	0.0661596	0.0054859	2.59568e-12	2.59568
with membrane pores	2	leaky	3.2714	0.0133688	0.636612	0.043734	0.0193373	0.0029211	4.87476e-12	4.87476
	3	leaky	1.7089	0.180231	8.58241	0.308	0.13618	0.0075659	1.88208e-12	1.88208
	4	leaky	10.1116	0.0313545	2.0903	0.317044	0.196253	0.0047087	3.02411e-12	3.02411
	5	leaky	3.639	0.193136	9.19694	0.702822	0.310751	0.0065357	2.17875e-12	2.17875
	6	leaky	1.7568	0.271164	12.9126	0.622015	0.210631	0.0083327	1.70889e-12	1.70889
	7	leaky	8.0594	0.0473319	3.15546	0.381468	0.23613	0.0062349	2.28386e-12	2.28386
	8	leaky	6.0706	0.103744	6.91628	0.629772	0.389844	0.0066501	2.14127e-12	2.14127
	9	leaky	7.2675	0.0603865	4.02577	0.438859	0.271657	0.0066553	2.1396e-12	2.1396
	10	leaky	6.3409	0.0695163	4.63442	0.440804	0.272855	0.006766	2.10459e-12	2.10459
	11	leaky	11.1202	0.0505856	3.37238	0.56253	0.348205	0.0063392	2.24628e-12	2.24628
	12	leaky	12.8272	0.0367939	2.45293	0.471955	0.292148	0.0057528	2.47526e-12	2.47526
	13	leaky	11.4586	0.0426534	2.84356	0.488763	0.302538	0.0048081	2.9616e-12	2.9616
	14	leaky	6.3613	0.151995	7.23786	0.966919	0.427507	0.0056503	2.52016e-12	2.52016
	15	leaky	8.4004	0.15902	7.57239	1.33584	0.590635	0.0075764	1.87947e-12	1.87947
	16	leaky	6.0875	0.166511	7.9291	1.01366	0.448177	0.0061203	2.32663e-12	2.32663
	17	leaky	7.2075	0.214452	10.212	1.5575	0.683411	0.009216	1.5451e-12	1.5451
	18	leaky	6.7298	0.213281	10.1562	1.43532	0.634632	0.0109951	1.29509e-12	1.29509
	19	leaky	6.7062	0.221561	10.5505	1.44125	0.656957	0.0055986	2.54343e-12	2.54343
	20	leaky	12.7995	0.0864113	5.76075	1.10601	0.684635	0.0084463	1.6859e-12	1.6859
	21	leaky	16.496	0.0937817	6.25211	1.54706	0.957617	0.0082129	1.73381e-12	1.73381
	22	leaky	12.5819	0.160601	7.64769	2.02058	0.893435	0.0126683	1.12404e-12	1.12404
	23	leaky	14.2636	0.263863	17.5909	3.7635	2.32972	0.0093852	1.51725e-12	1.51725
	24	leaky	11.5433	0.162182	10.8121	2.86577	1.15885	0.0092122	1.54574e-12	1.54574
	25	leaky	12.4182	0.141729	9.44863	1.76007	1.08947	0.0097939	1.45393e-12	1.45393
	26	leaky	12.8936	0.131569	8.77129	1.69647	1.05008	0.0077237	1.84363e-12	1.84363
	27	leaky	15.5754	0.10885	7.25666	1.69541	1.04945	0.0090231	1.57813e-12	1.57813
	28	leaky	12.0306	0.206344	13.7563	2.48244	1.53665	0.0092615	1.53751e-12	1.53751
	29	leaky	38.8498	0.0973943	6.49295	3.78377	2.34217	0.008152	1.74677e-12	1.74677
	30	leaky	21.0999	0.140748	9.38317	2.96973	1.8383	0.0095441	1.49198e-12	1.49198
HisFGF2-Y81pCMF-77/95-GFP	1	non-leaky	9.2015	0.0181703	0.86525	0.167194	0.0739242	0.0027088	5.25681e-12	5.25681
without membrane pores	2	non-leaky	8.9349	0.0191738	0.913038	0.17131	0.0757469	0.0025152	5.66144e-12	5.66144
	3	non-leaky	7.1138	0.0226925	1.08059	0.16143	0.0713757	0.0024402	5.83544e-12	5.83544
	4	non-leaky	49.145	0.00799248	0.380594	0.392786	0.173671	0.0049359	2.88491e-12	2.88491
	5	non-leaky	22.1478	0.0245638	1.16971	0.544036	0.240544	0.0023187	6.14122e-12	6.14122
	6	non-leaky	22.4219	0.0348421	1.65915	0.781221	0.345417	0.0029284	4.8626e-12	4.8626
	7	non-leaky	13.7697	0.0380064	1.80983	0.523356	0.231392	0.0029364	4.84936e-12	4.84936
	8	non-leaky	33.6646	0.0178218	0.848656	0.599938	0.265272	0.0033435	4.25891e-12	4.25891
	9	non-leaky	39.3044	0.0382279	1.82038	1.4578	0.664337	0.0037175	3.83044e-12	3.83044
* number of diffusing species in the focal plane
** determined by fluorescence intensity measurements
			Brightness of monomer unit
			GUVs: PM+2%Ni
				Particle number	Diffusion time	Brightness	Avarage of Brightness
					[s]	[counts/s]	[counts/s]
			1	3.1384	1.1134	0.0217777	0.0209524
			2	5.0008	1.2766	0.0203305
			3	3.6335	1.136	0.0218028
			4	5.927	1.2107	0.0208511
			5	3.63	1.2	0.02
			after change of microscope setting
				Particle number	Diffusion time	Brightness	Avarage of Brightness
					[s]	[counts/s]	[counts/s]
			1	23.4653	1.7955	0.0128175	0.015076
			2	29.4108	2.3917	0.0172631
			3	23.5521	1.9549	0.0139666
			4	35.4424	2.5351	0.0162364
			5	14.4783	2.5202	0.0149457
			6	21.4756	2.2904	0.0152269
