# Supplementary figures and images for: Key steps in unconventional secretion of fibroblast growth factor 2 reconstituted with purified components
Source: eLife journal article supplement (doi:10.7554/elife.28985), 2017-07-19

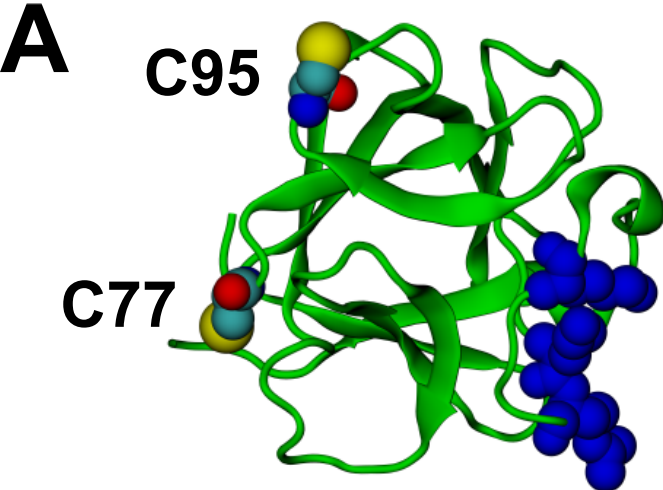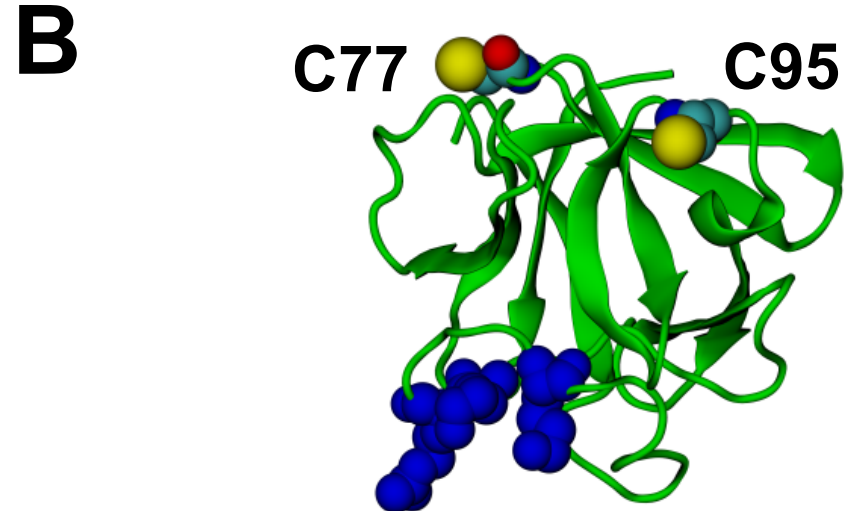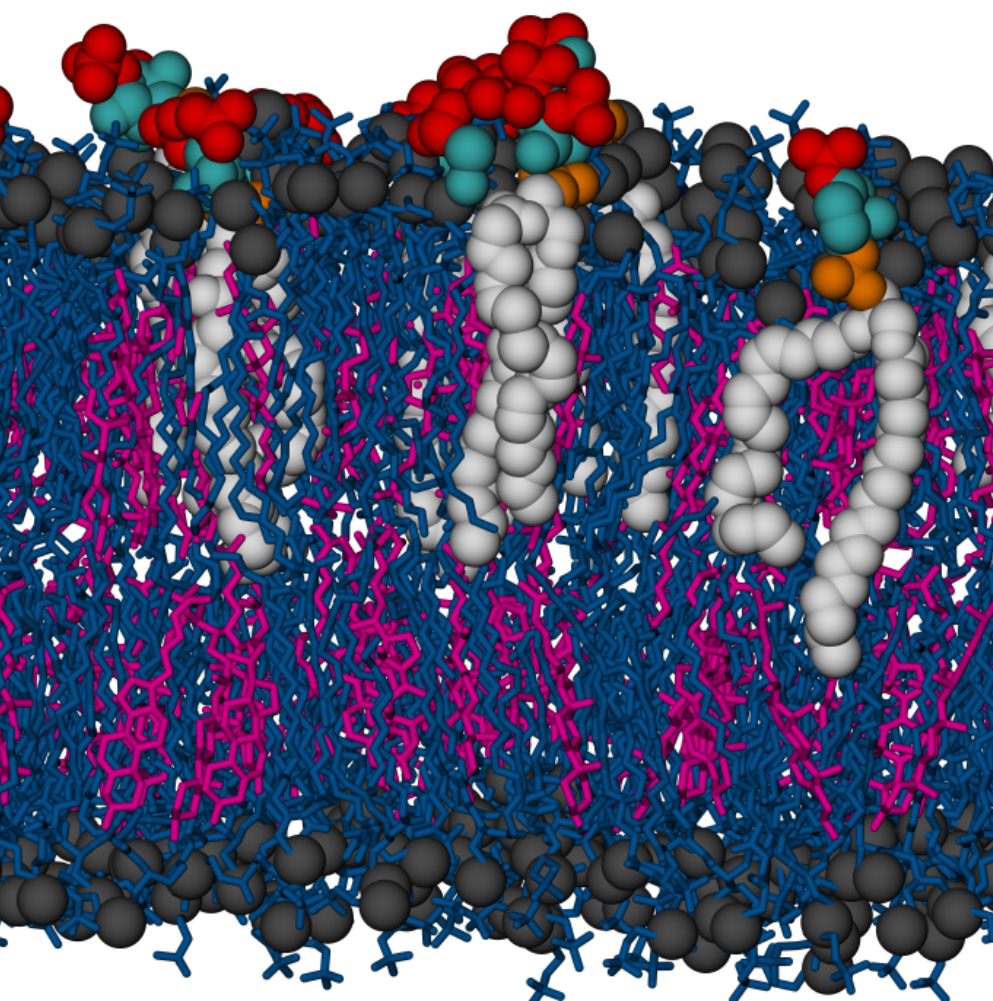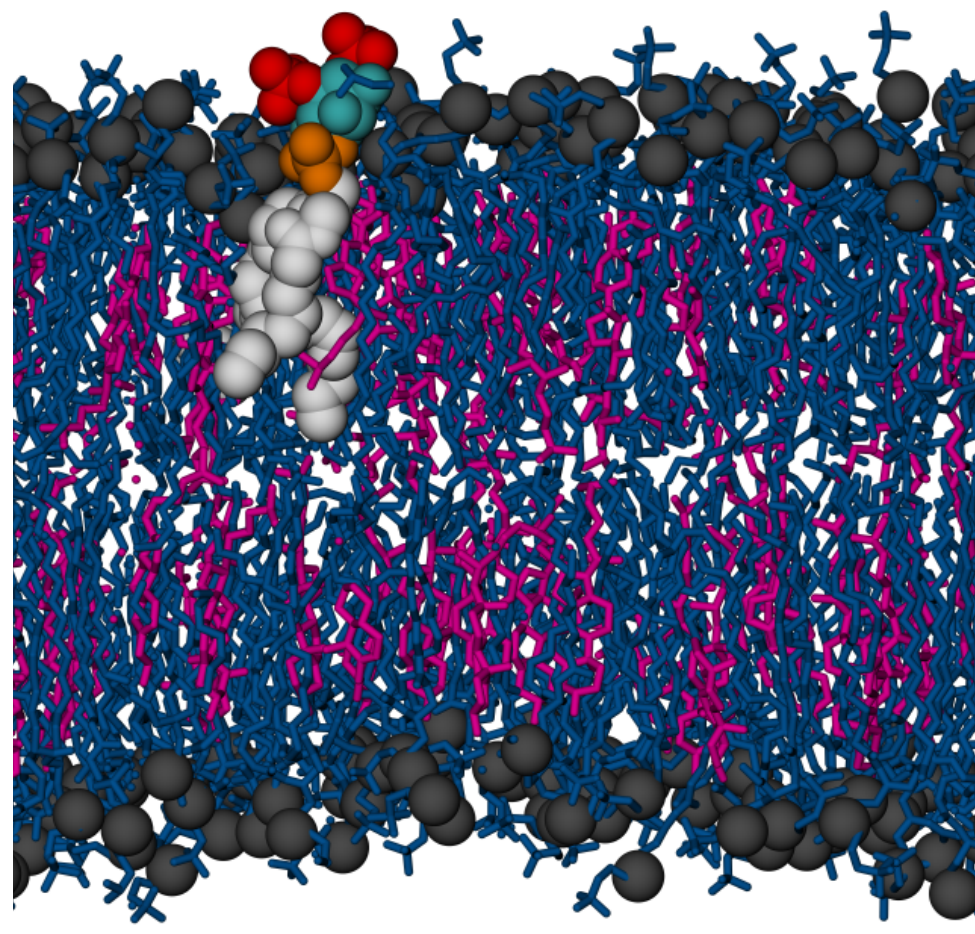

Supplement: supp [file elife_poa_e28985_Figure_13_Supplement_1.pdf › elife_poa_e28985_Figure_13_Supplement_1.pdf]

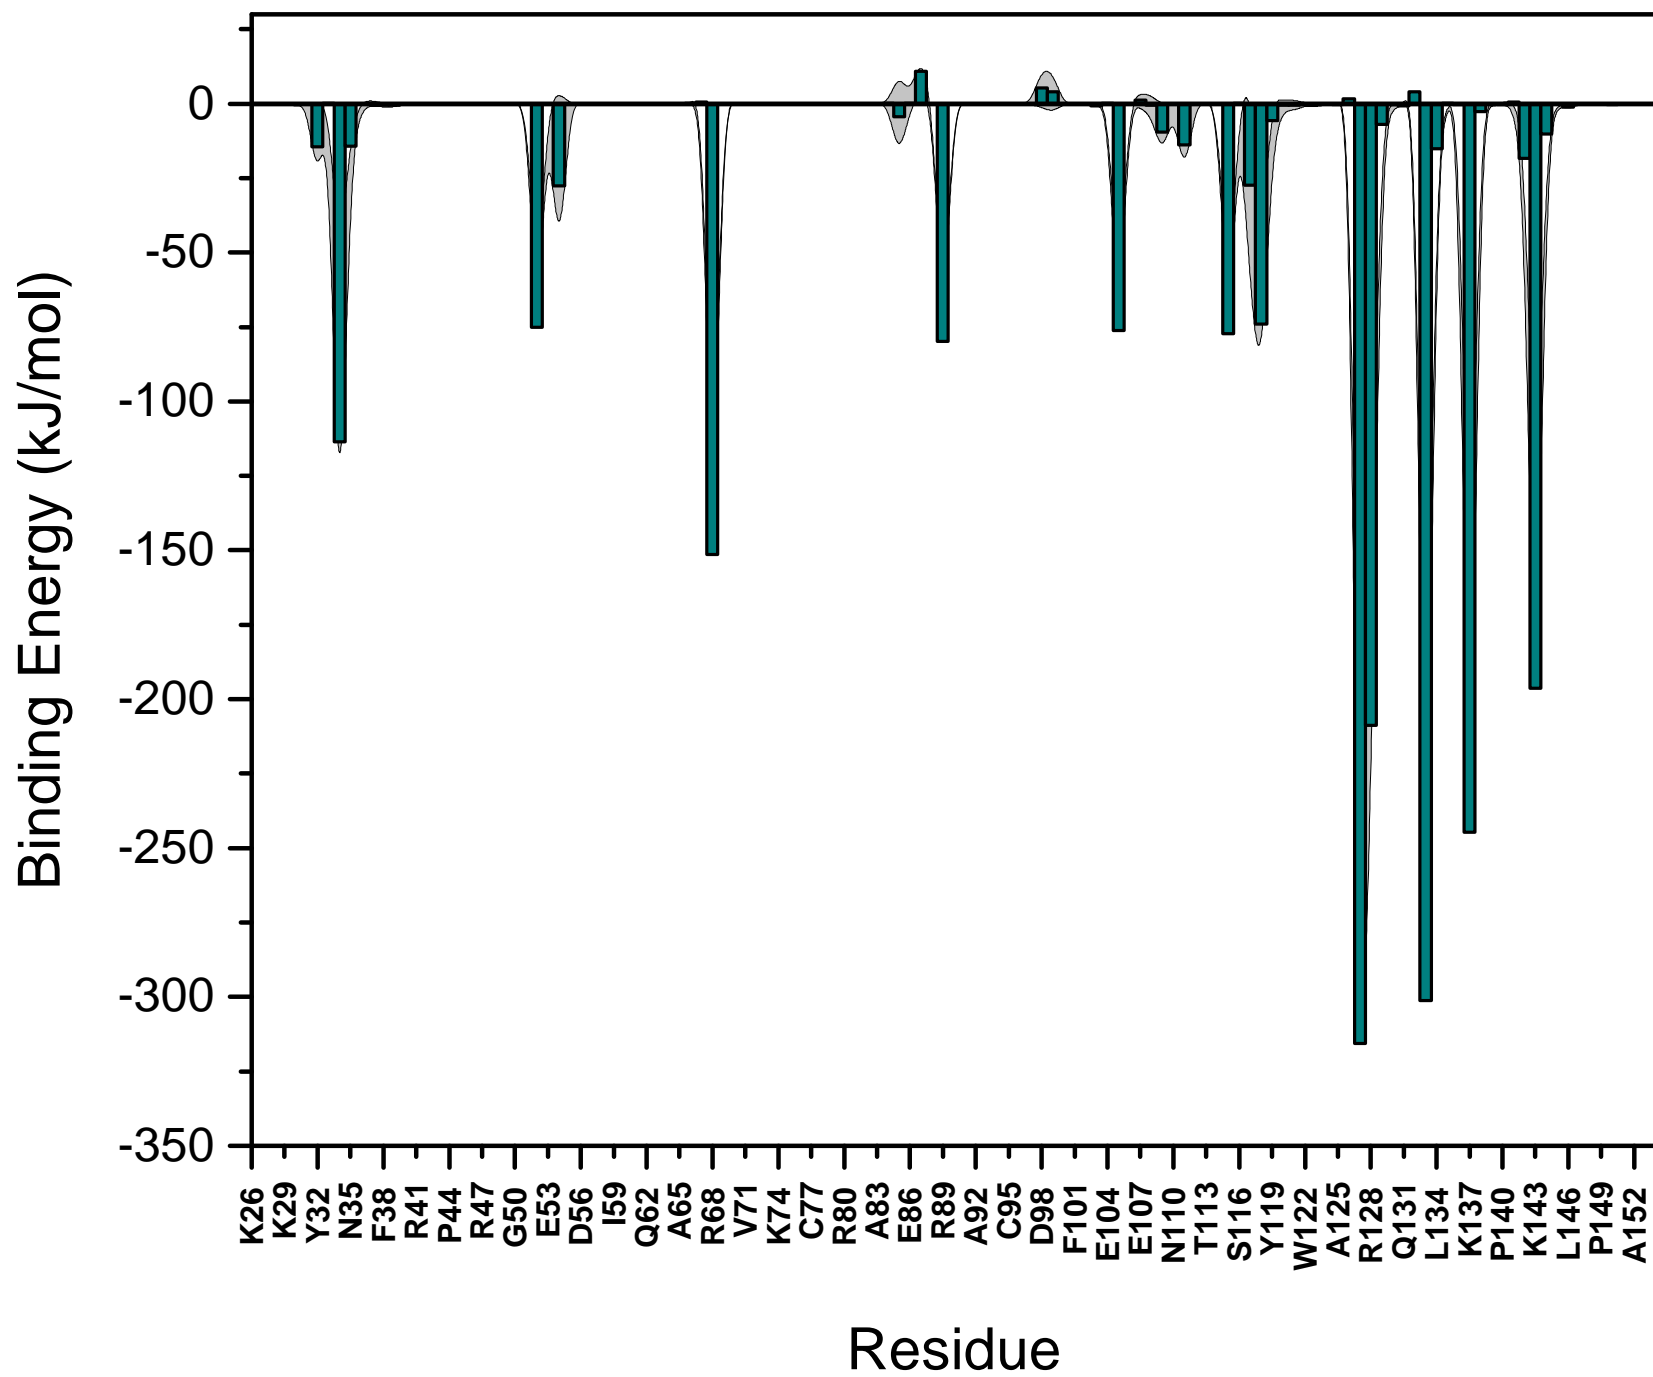

Supplement: supp [file elife_poa_e28985_Figure_13_Supplement_2.pdf › elife_poa_e28985_Figure_13_Supplement_2.pdf]

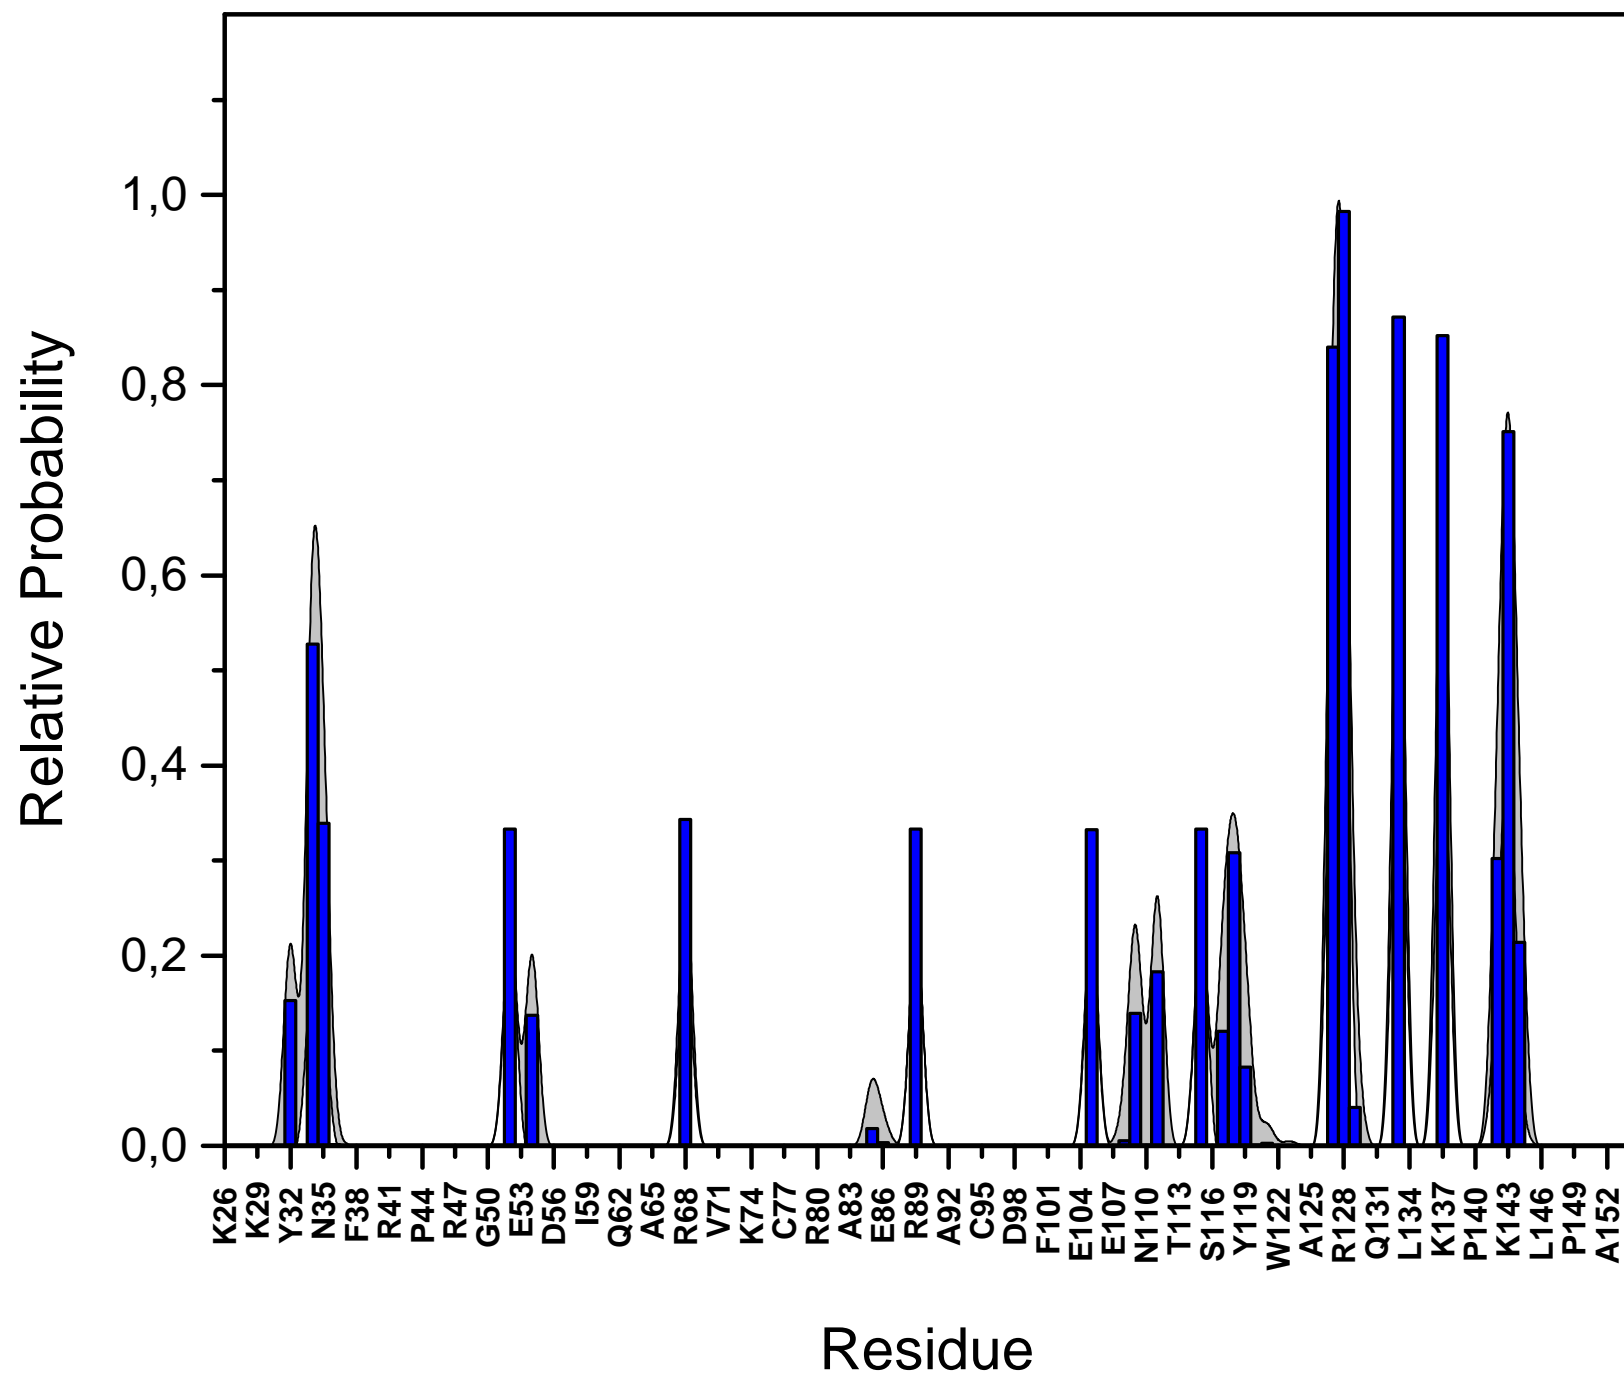

Supplement: supp [file elife_poa_e28985_Figure_13_Supplement_3.pdf › elife_poa_e28985_Figure_13_Supplement_3.pdf]

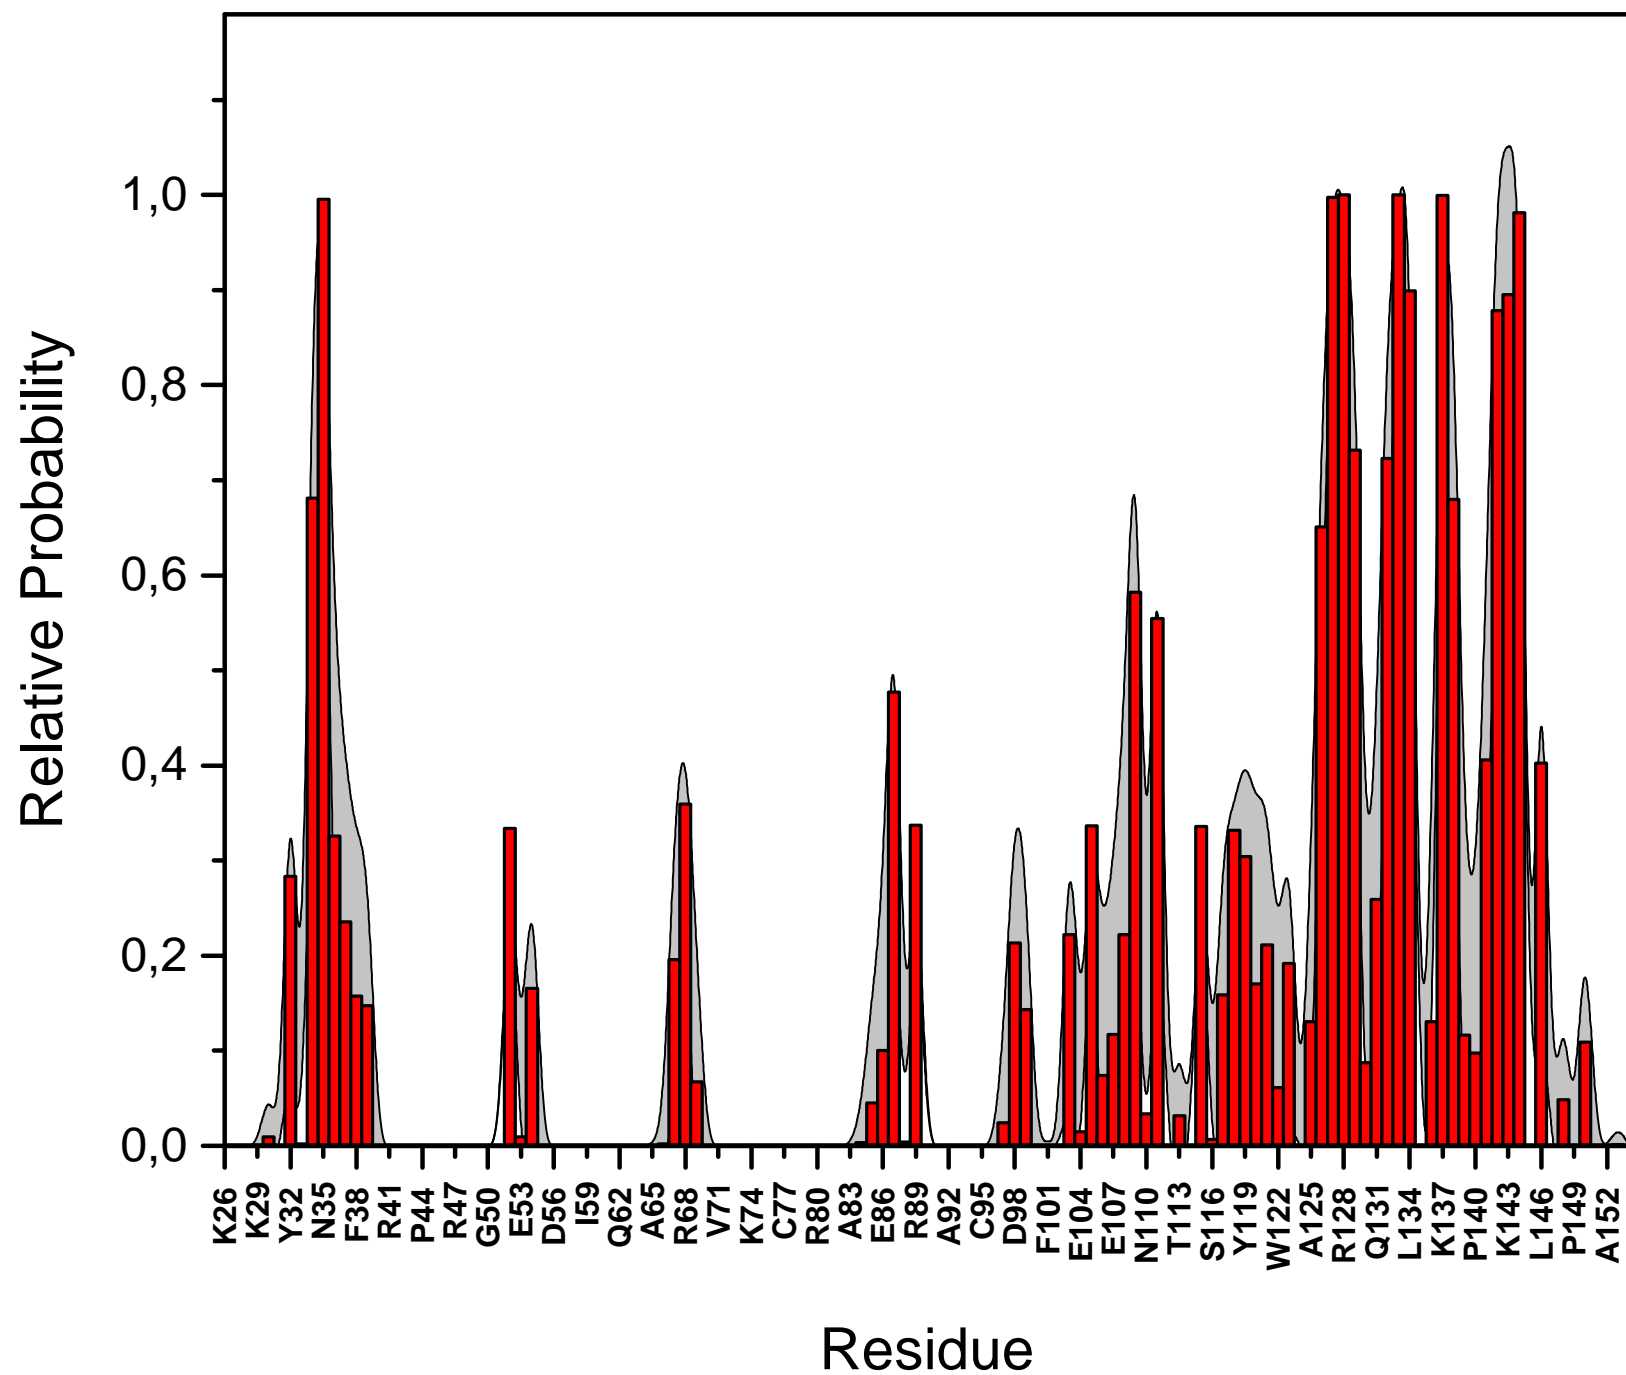

Supplement: supp [file elife_poa_e28985_Figure_13_Supplement_4.pdf › elife_poa_e28985_Figure_13_Supplement_4.pdf]

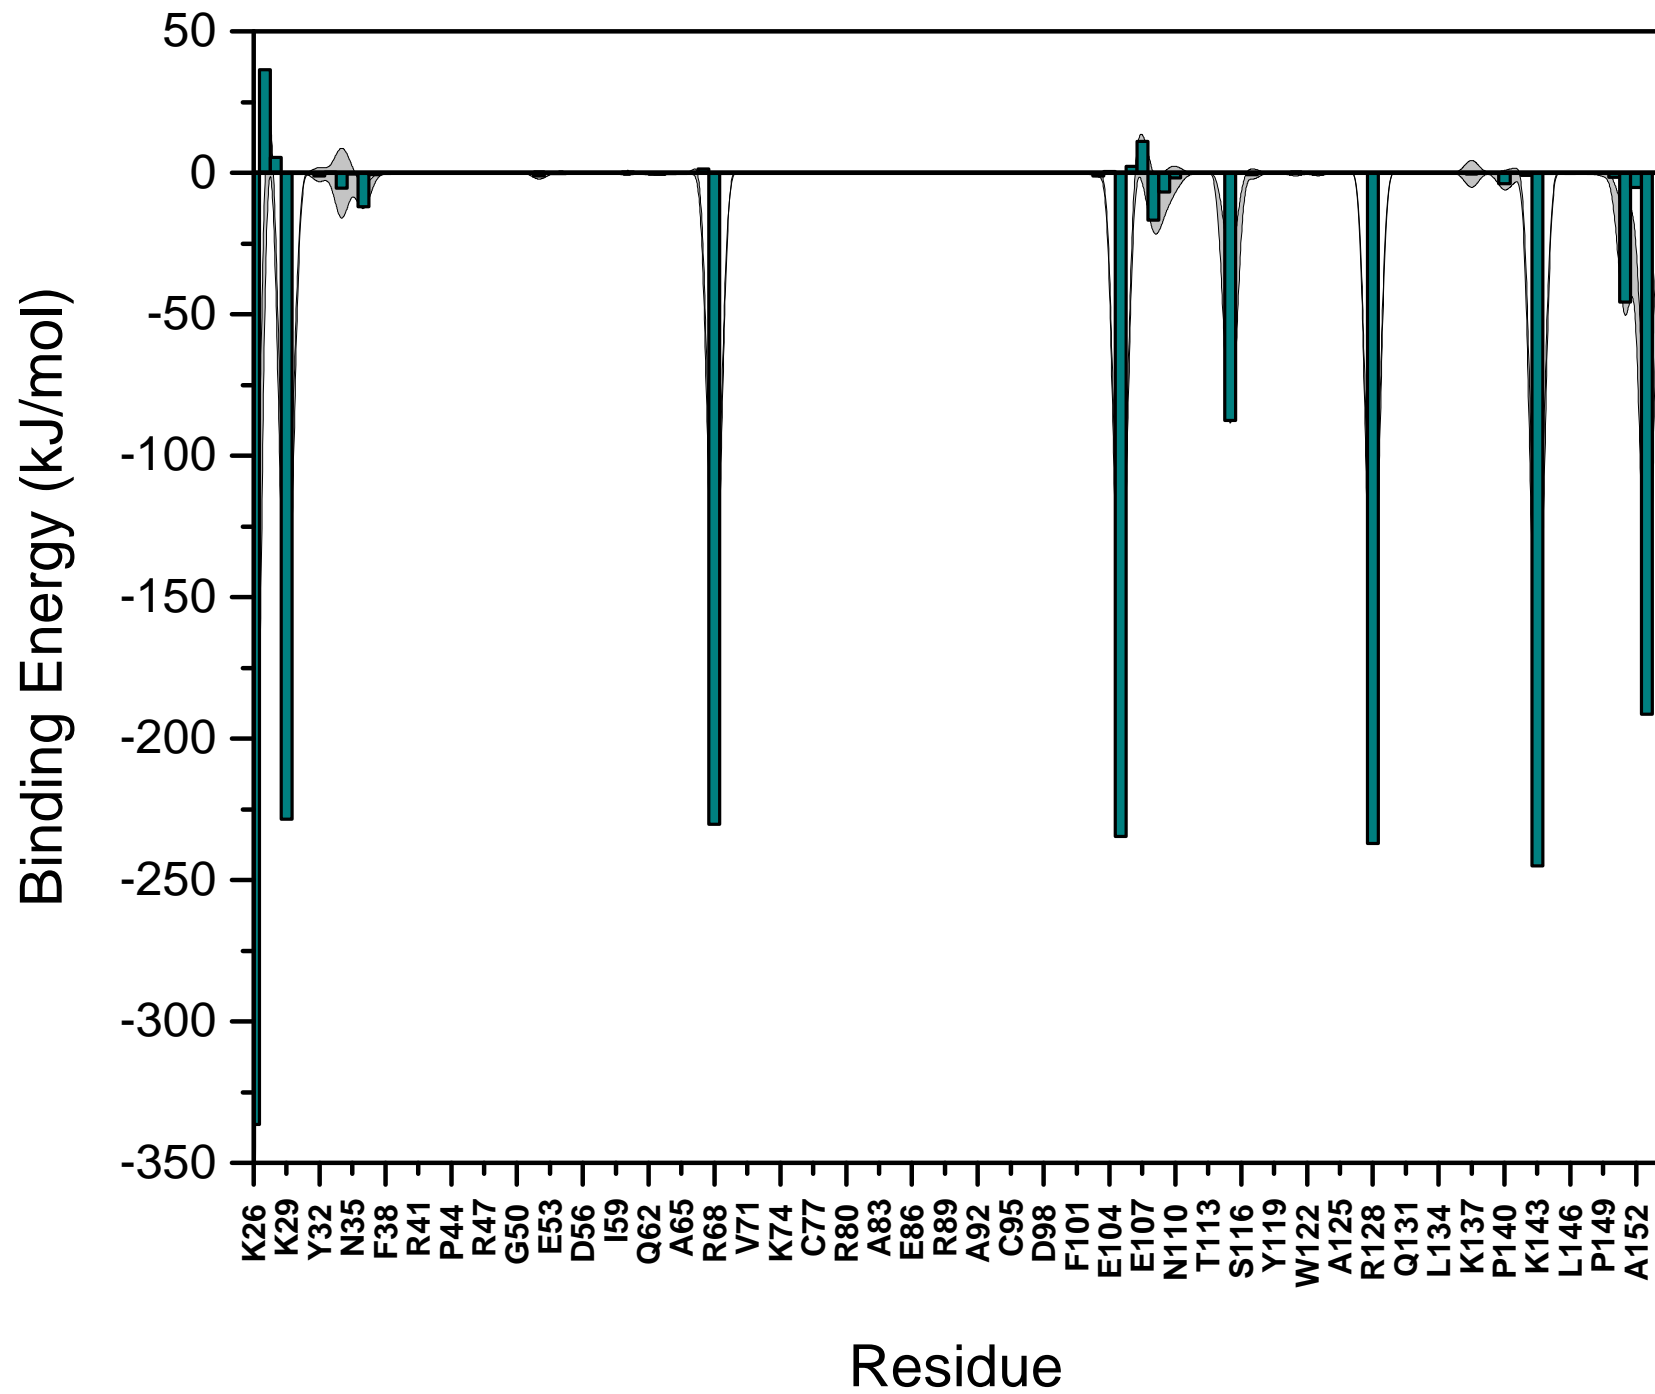

Supplement: supp [file elife_poa_e28985_Figure_13_Supplement_5.pdf › elife_poa_e28985_Figure_13_Supplement_5.pdf]

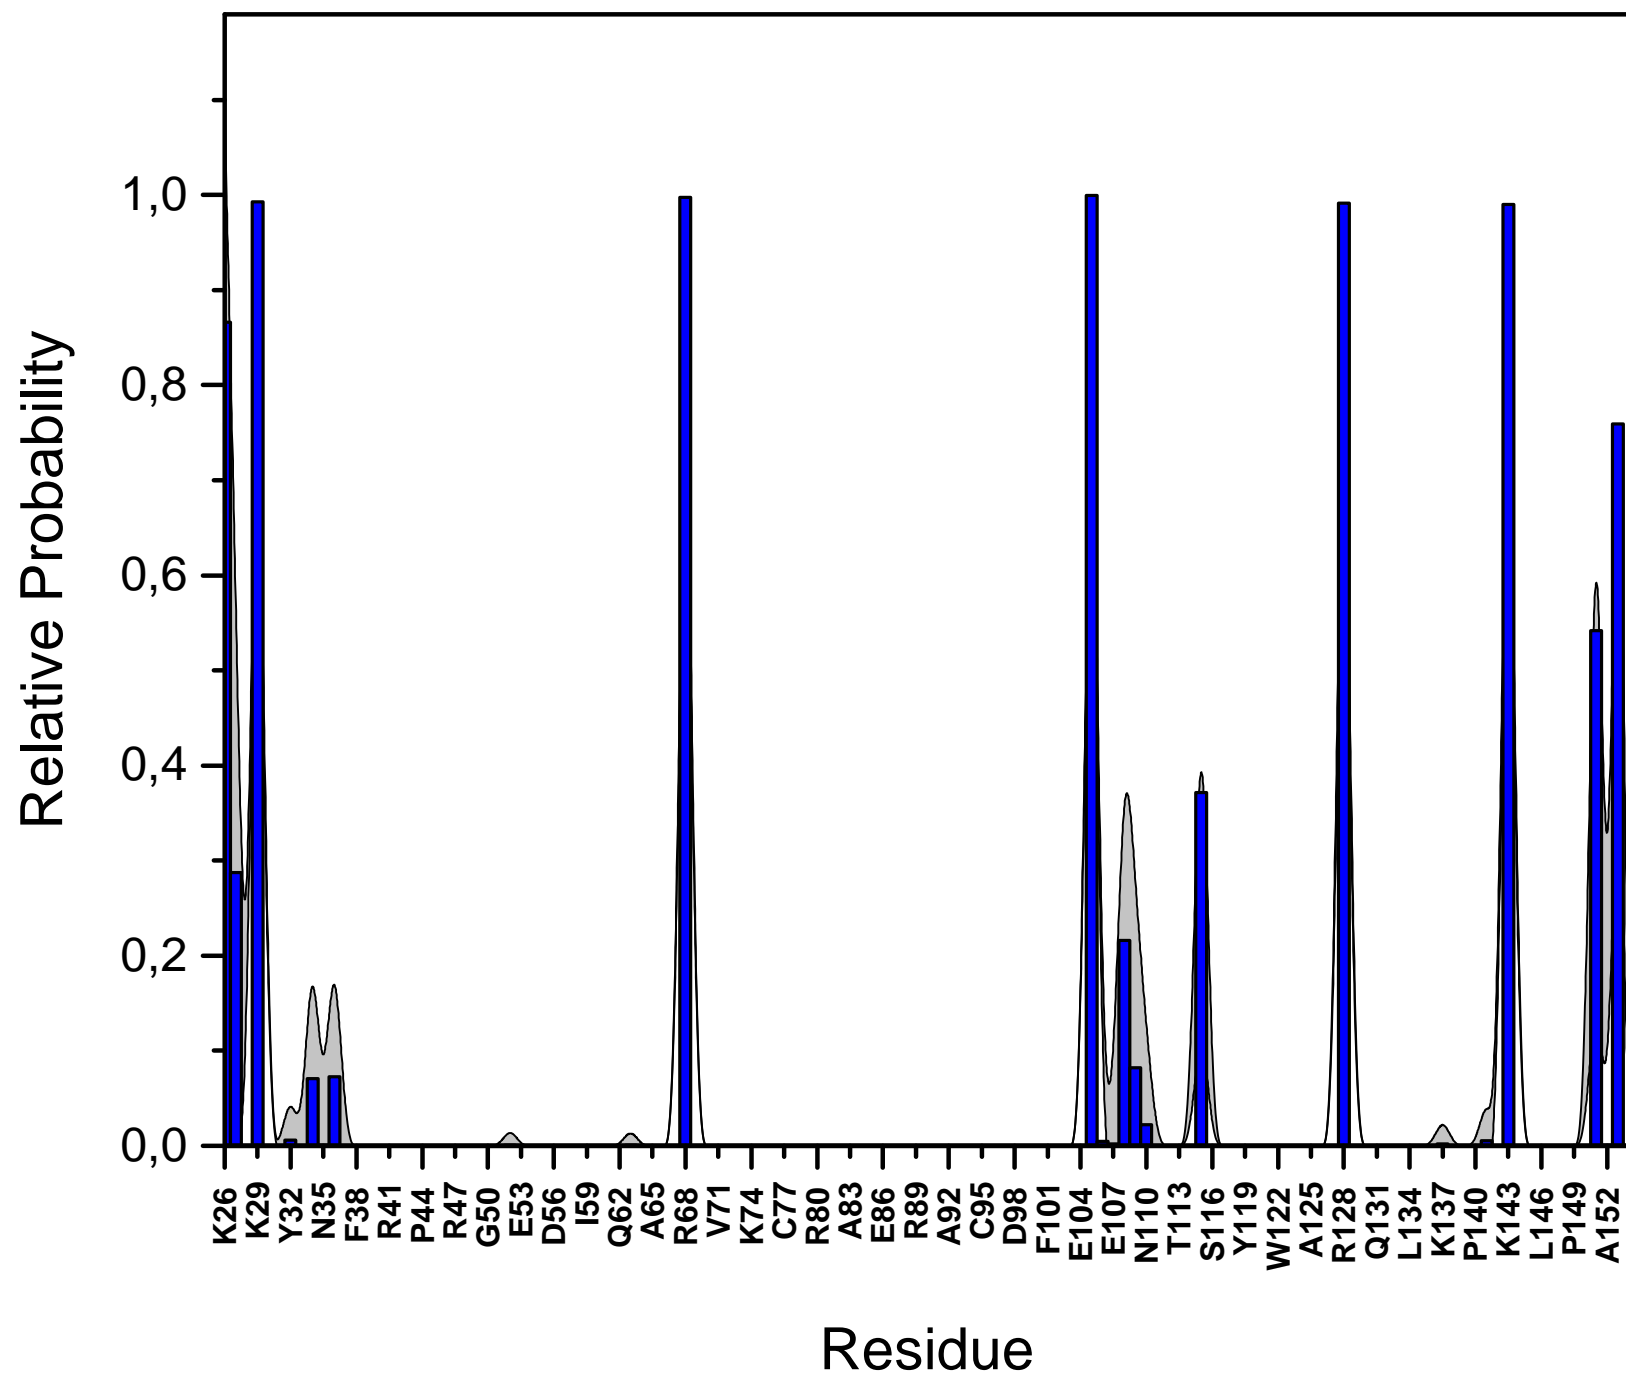

Supplement: supp [file elife_poa_e28985_Figure_13_Supplement_6.pdf › elife_poa_e28985_Figure_13_Supplement_6.pdf]

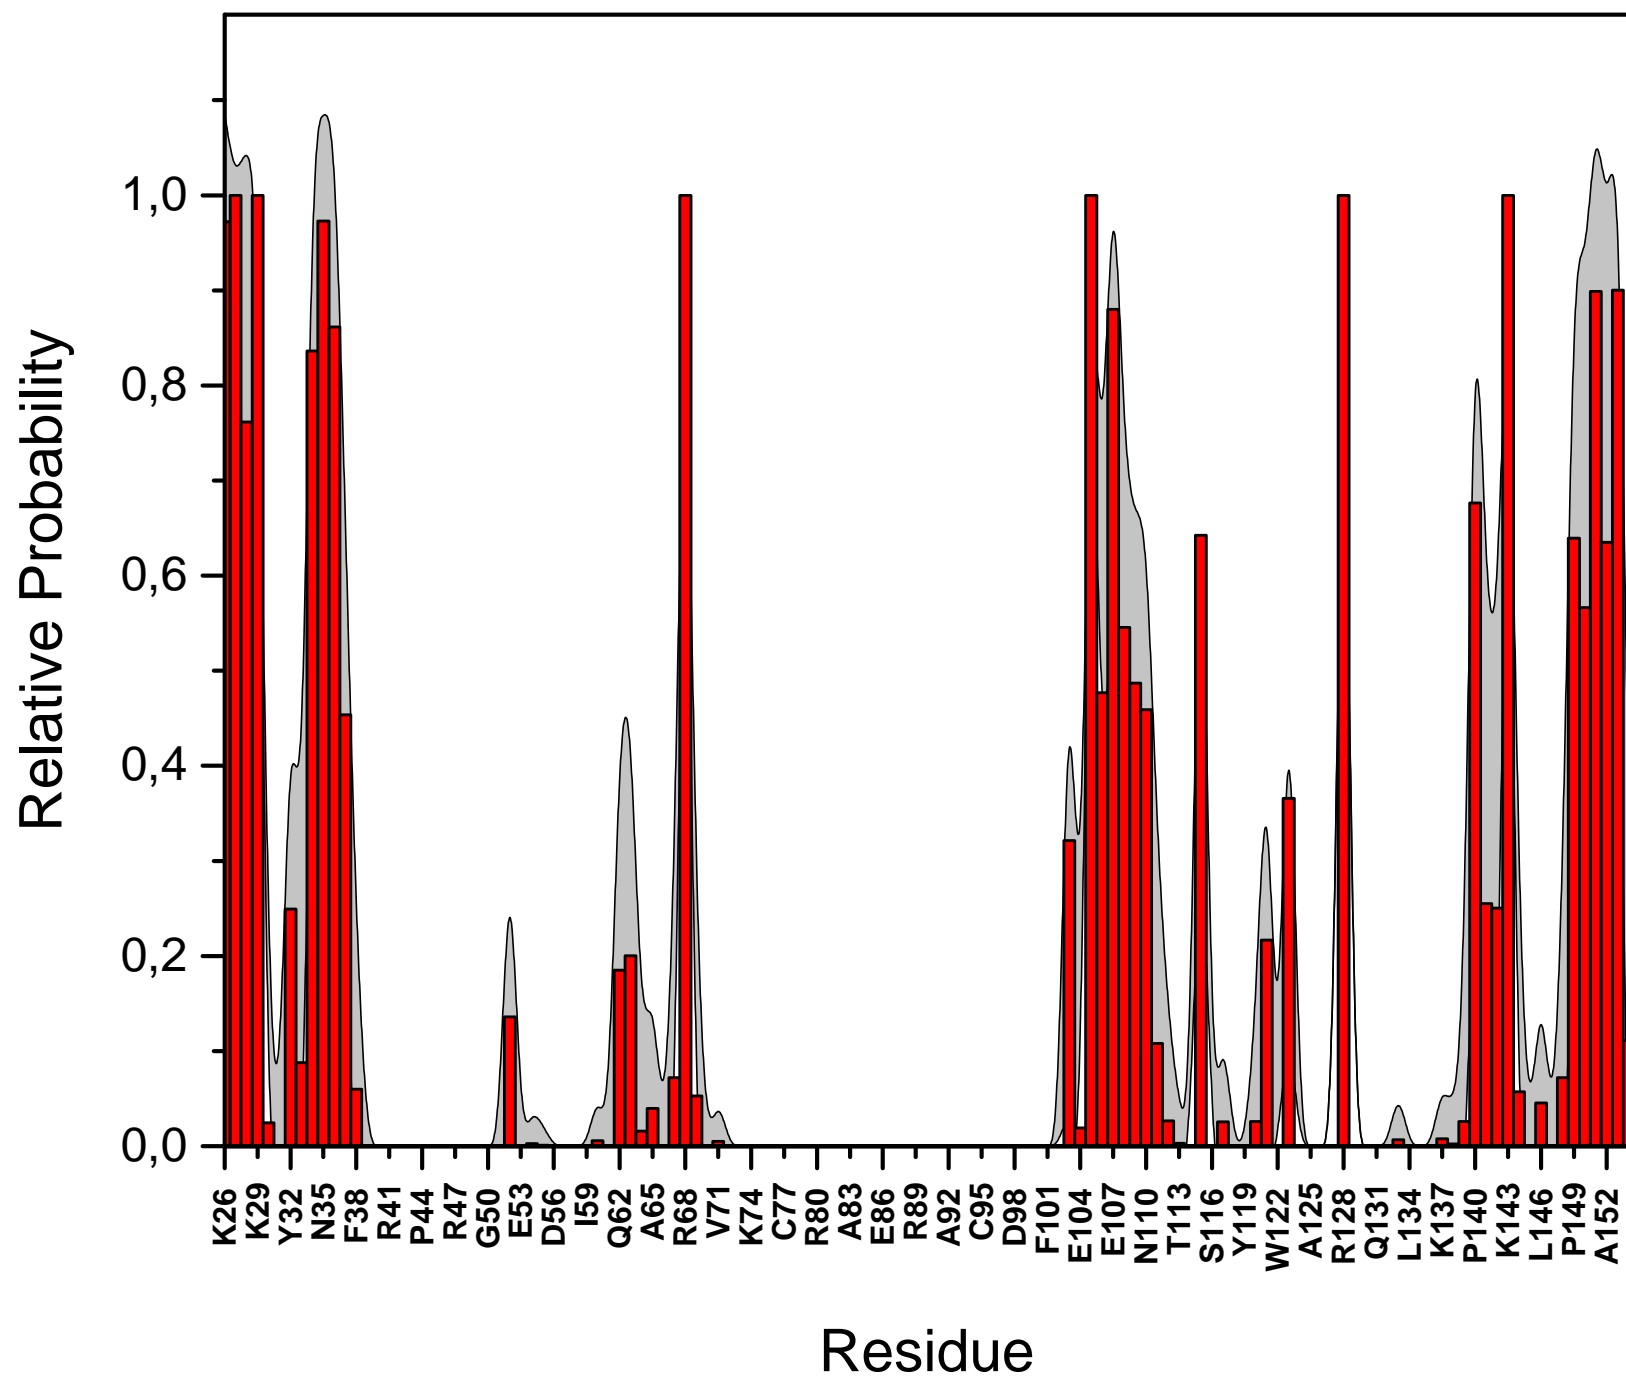

Supplement: supp [file elife_poa_e28985_Figure_13_Supplement_7.pdf › elife_poa_e28985_Figure_13_Supplement_7.pdf]

**C77**

**C95**

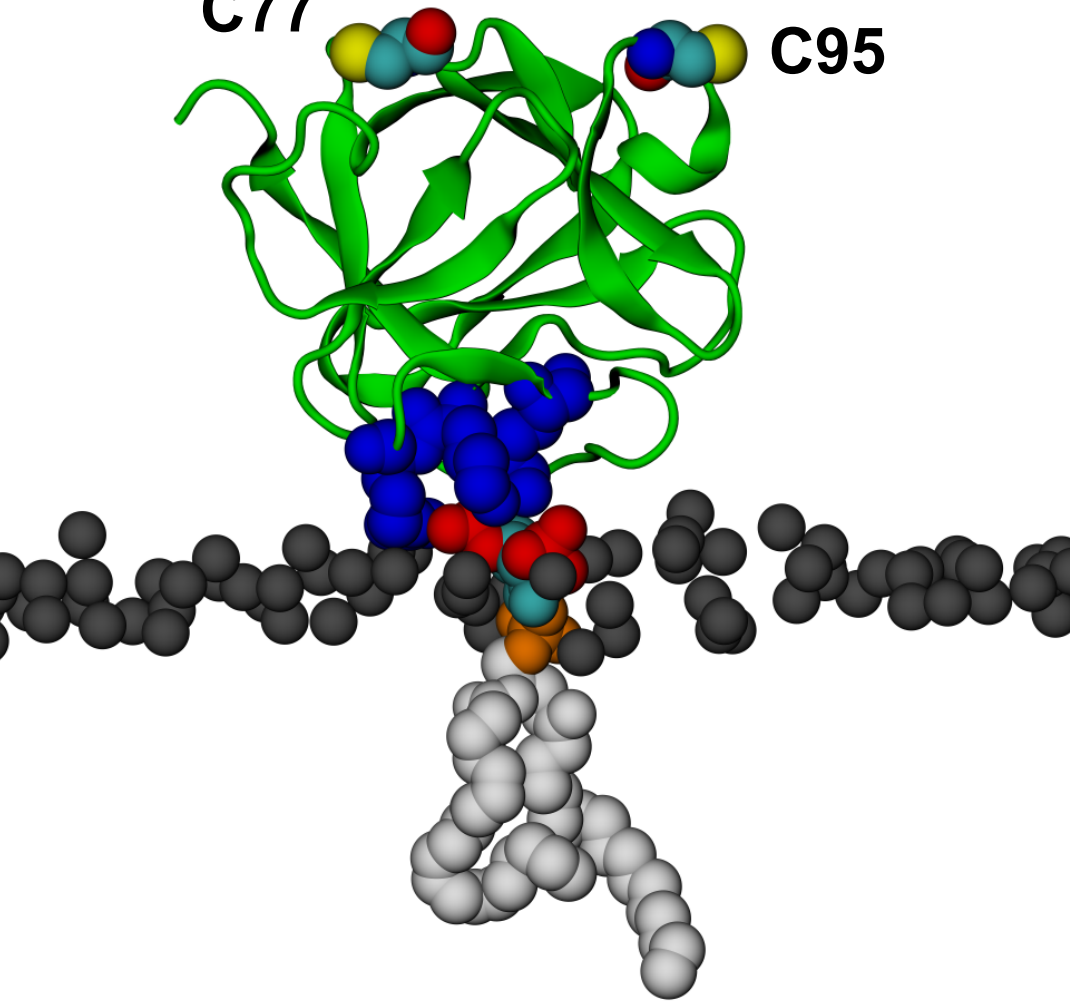

Supplement: supp [file elife_poa_e28985_Figure_13_Supplement_8.pdf › elife_poa_e28985_Figure_13_Supplement_8.pdf]

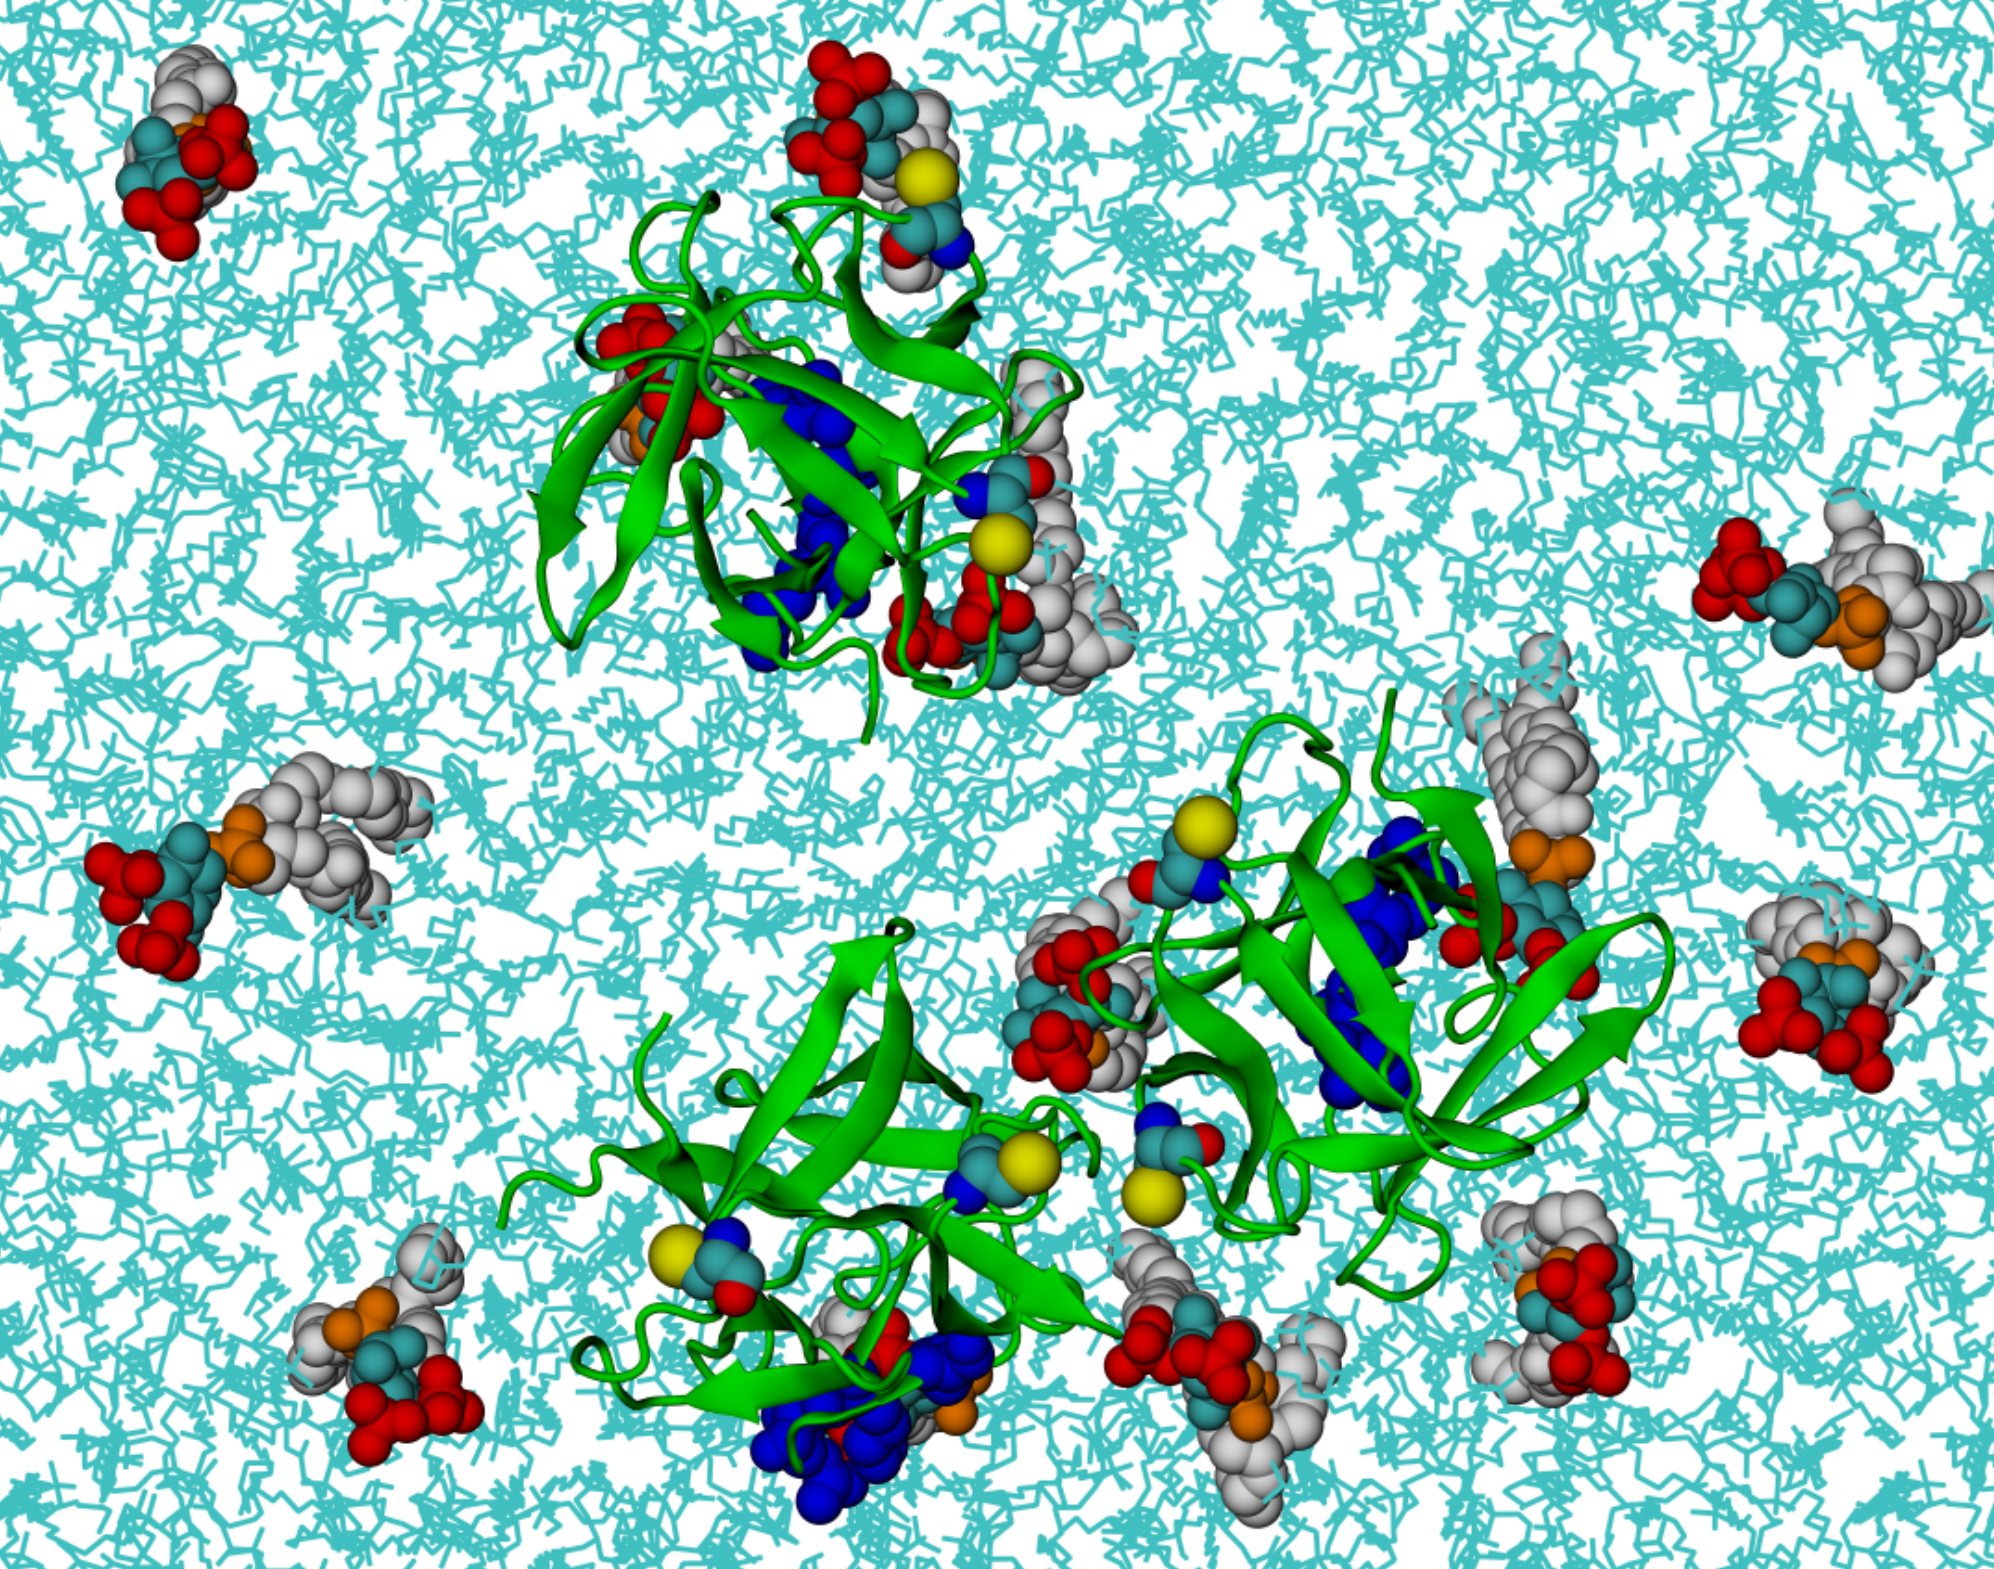

Supplement: supp [file elife_poa_e28985_Figure_14_Supplement_1.pdf › elife_poa_e28985_Figure_14_Supplement_1.pdf]

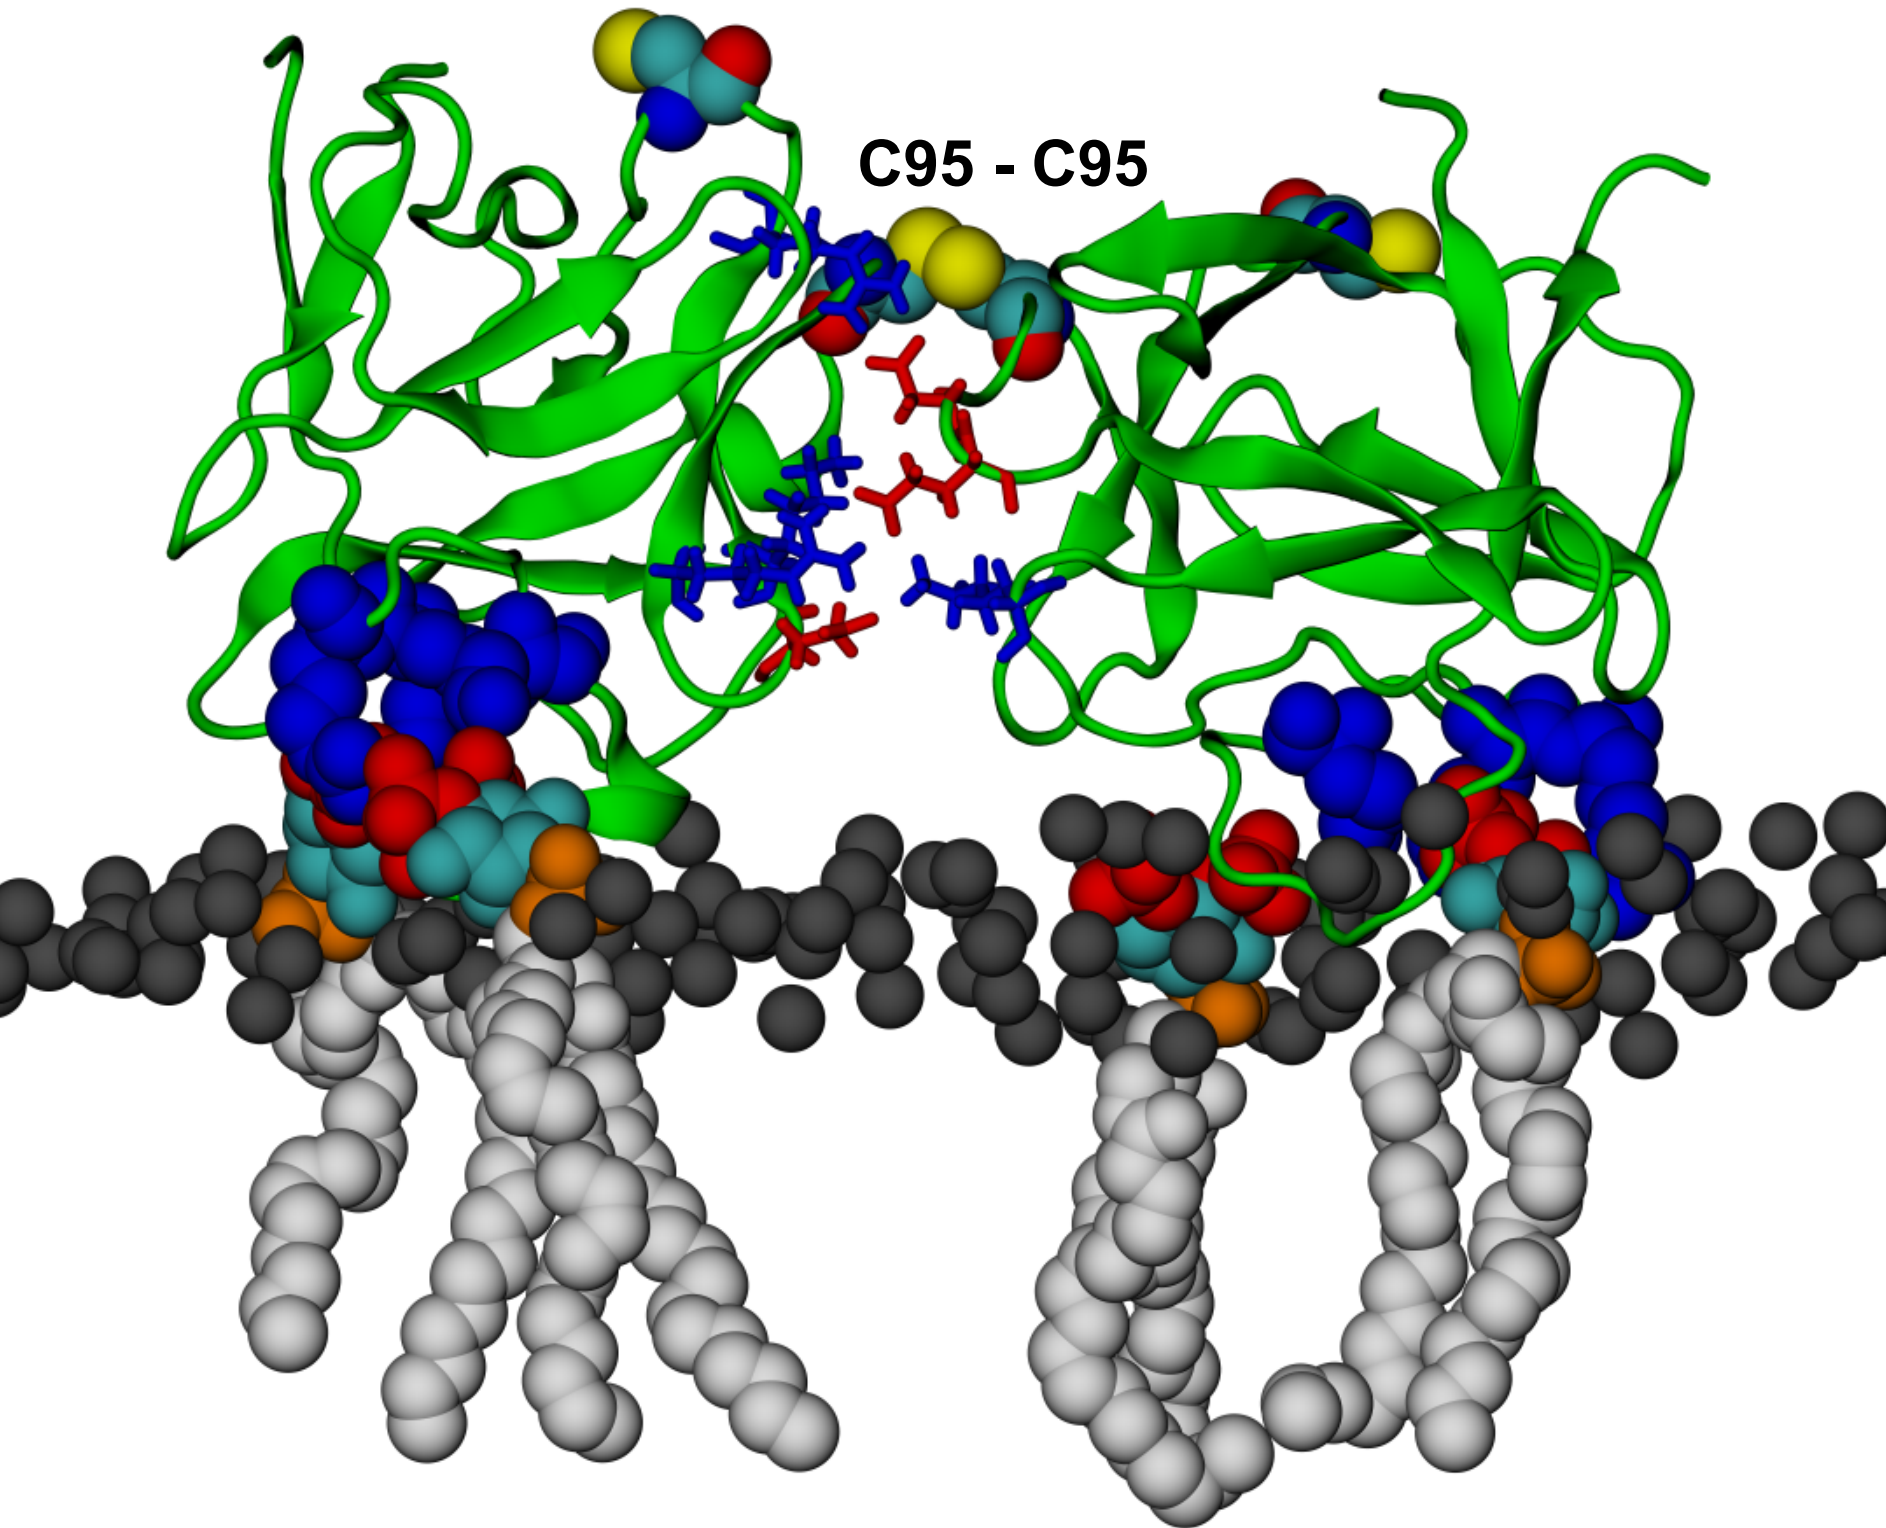

Supplement: supp [file elife_poa_e28985_Figure_14_Supplement_2.pdf › elife_poa_e28985_Figure_14_Supplement_2.pdf]

**A**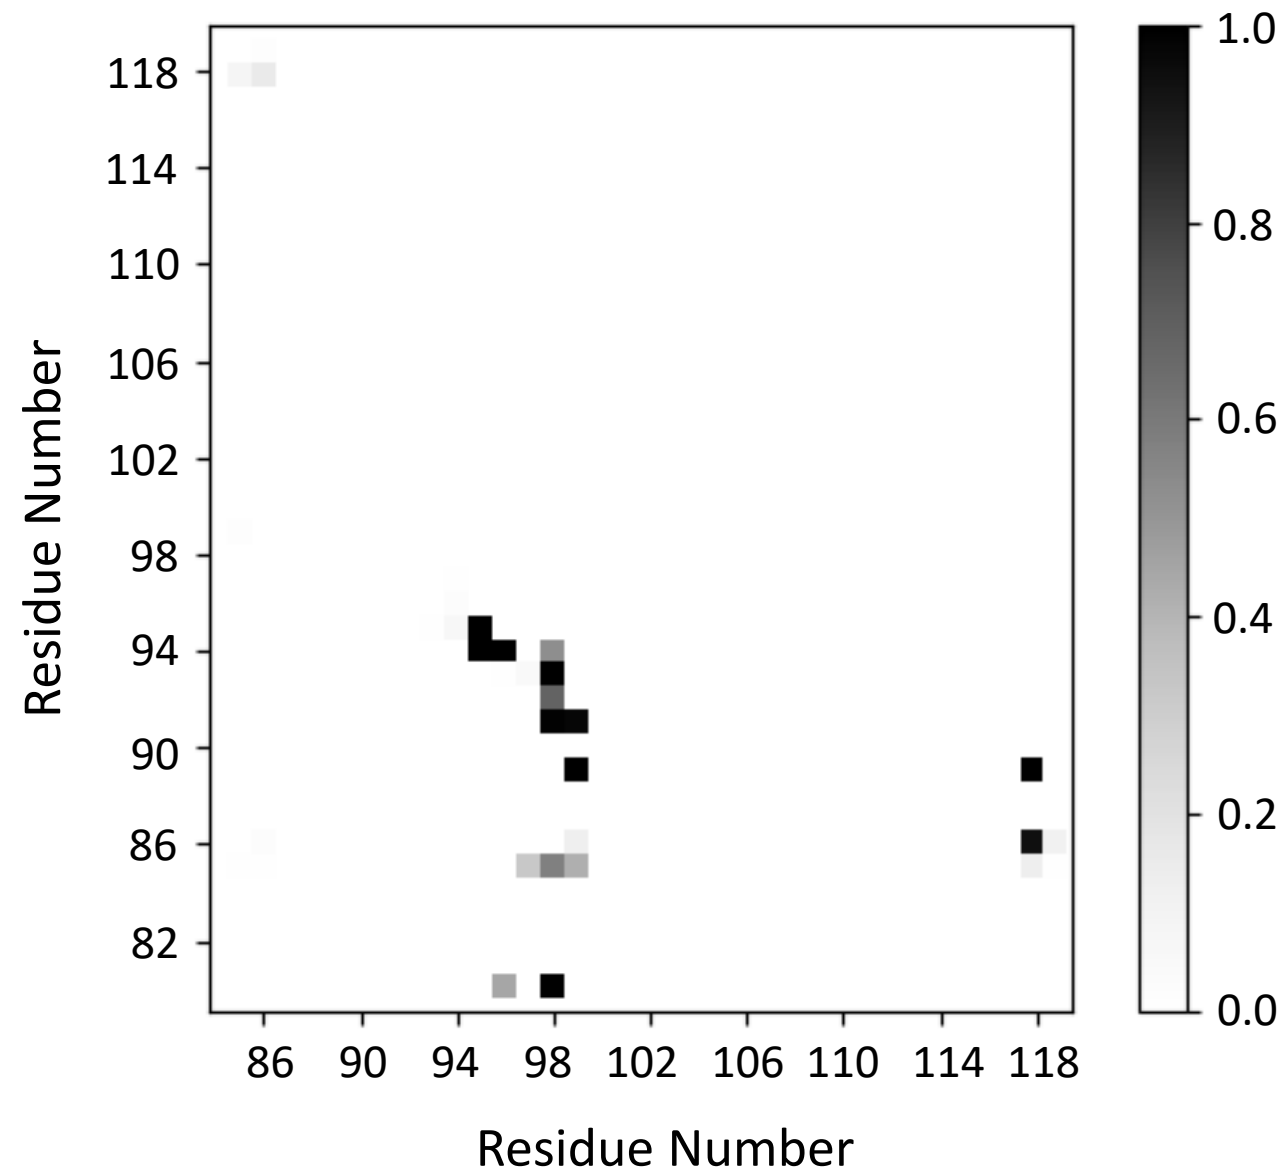**B**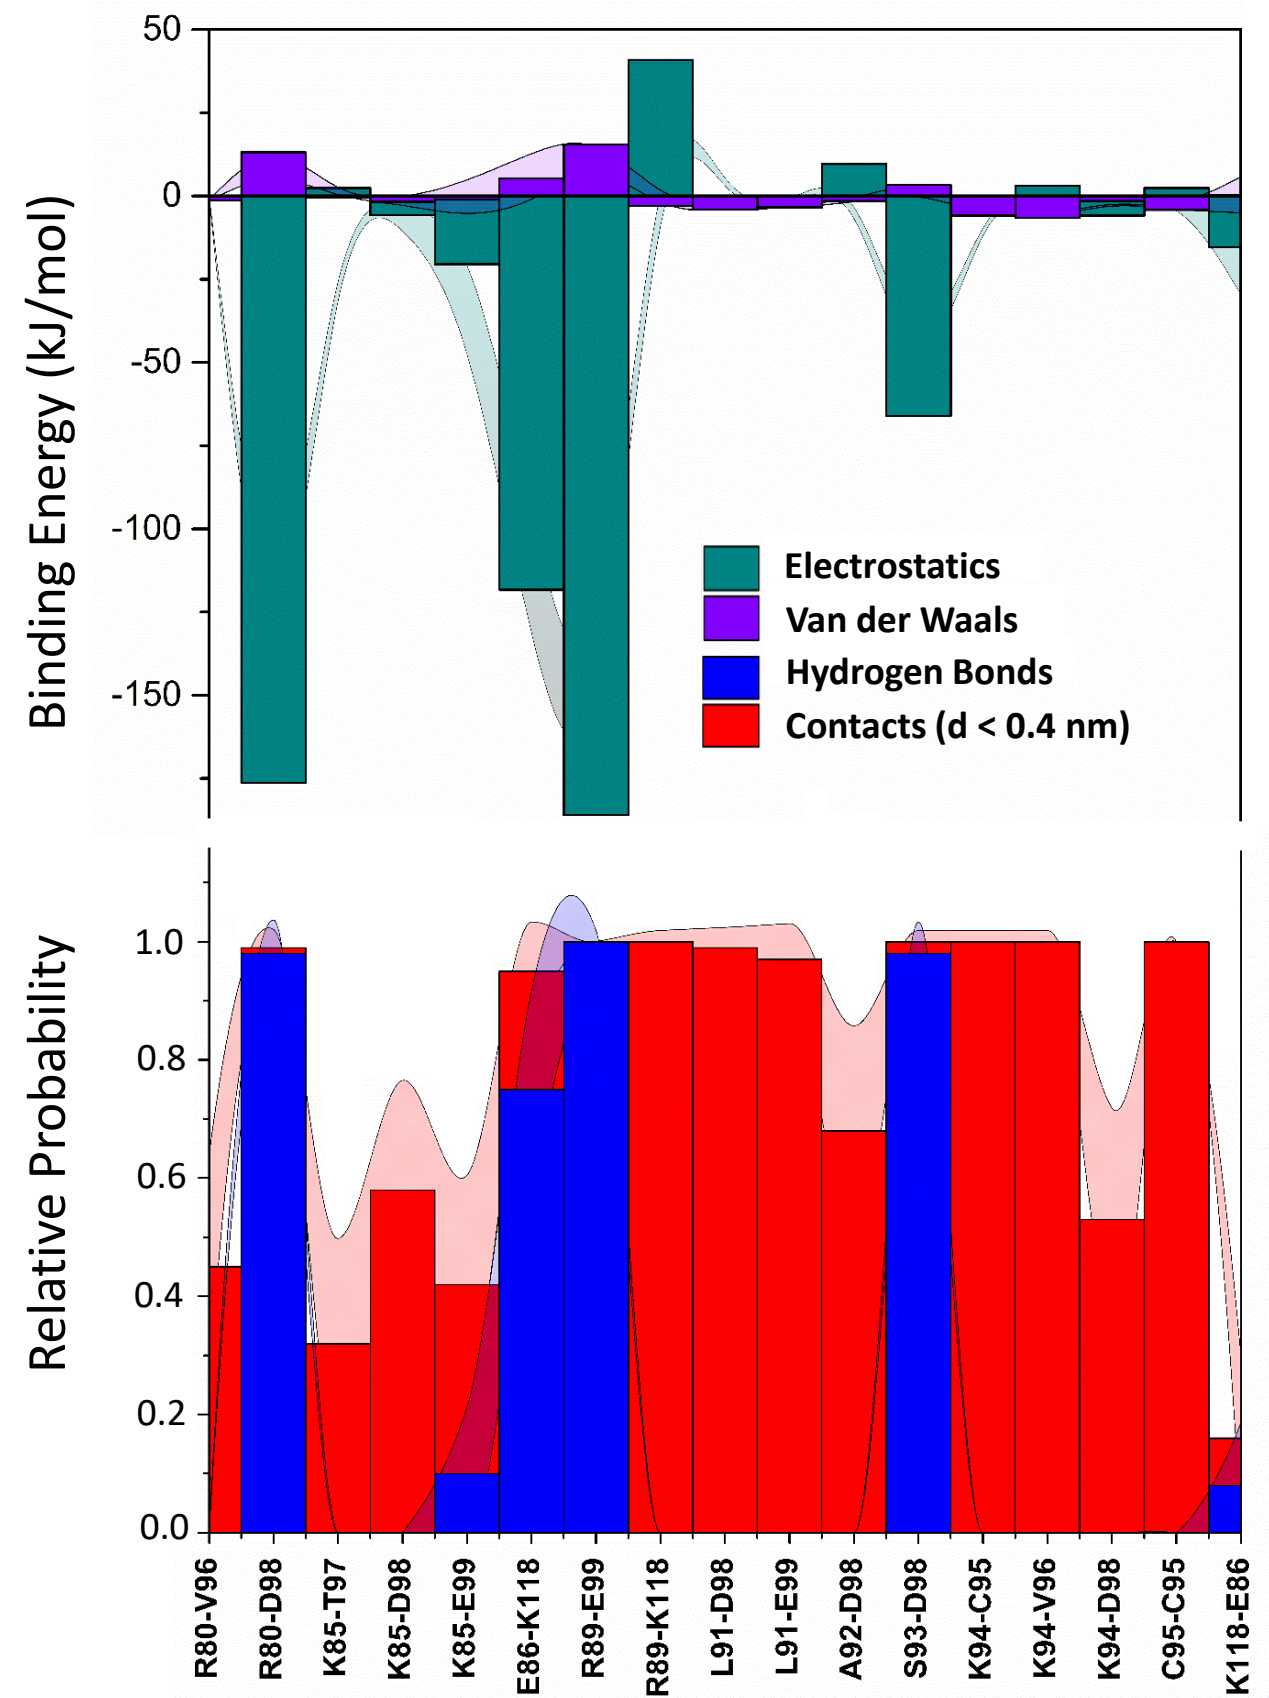

Supplement: supp [file elife_poa_e28985_Figure_14_Supplement_3.pdf › elife_poa_e28985_Figure_14_Supplement_3.pdf]
